# Supplementary material for: Data quality control and tools in passive seismic experimentsexemplified on Czech broad-band seismic pool MOBNET in theAlpArray collaborative project
Source: Copernicus journal article supplement (doi:10.5194/gi-2017-7), 2017-05-15

# A081A

## Dobřichov

### INSTALLATION

Start : 25.9.2015  
Lat : 50.0752  
Lon : 15.0341  
Alt : 228 m

### EQUIPMENT

Sensor : STS 2  
Depth : 3 m  
Recorder : Gaia 1  
Power : electricity grid

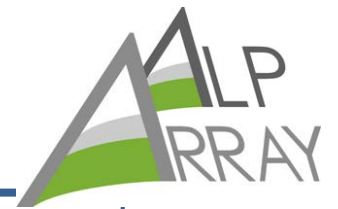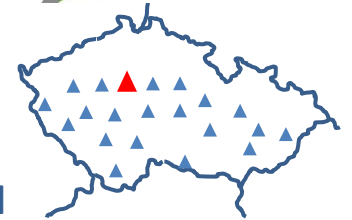

The station is located in the basement of an unused rectory near the Holy Trinity church in Dobřejov.

Seismometer is placed in a niche stone of the wall.

The GPS antenna is brought out through the vent, length - 10 m, direction N, open view.

Geomorphology: Elbe Lowland.

Subsoil: sand, gravel.

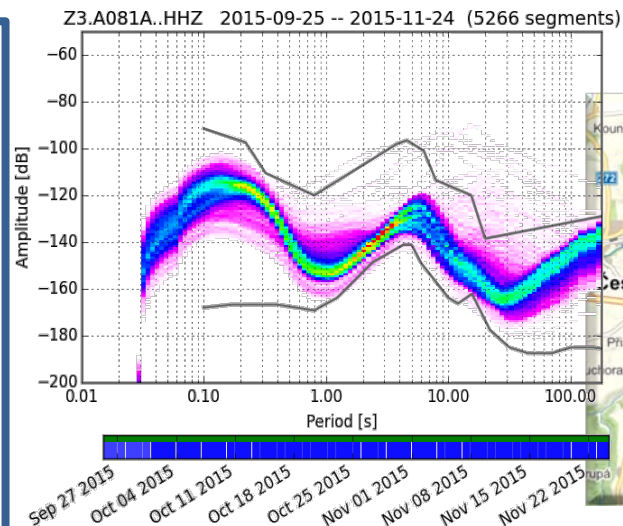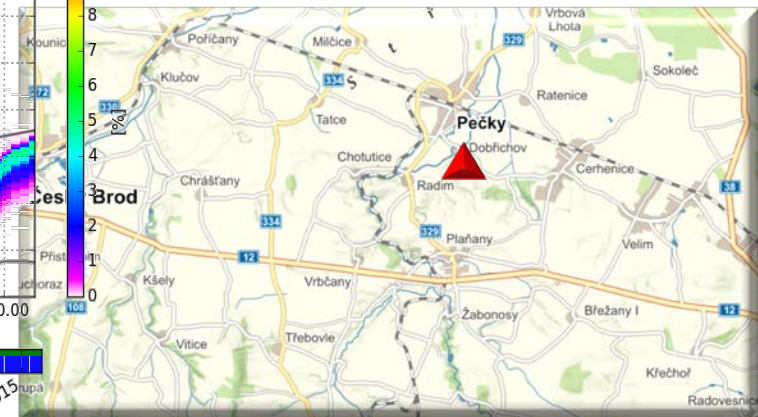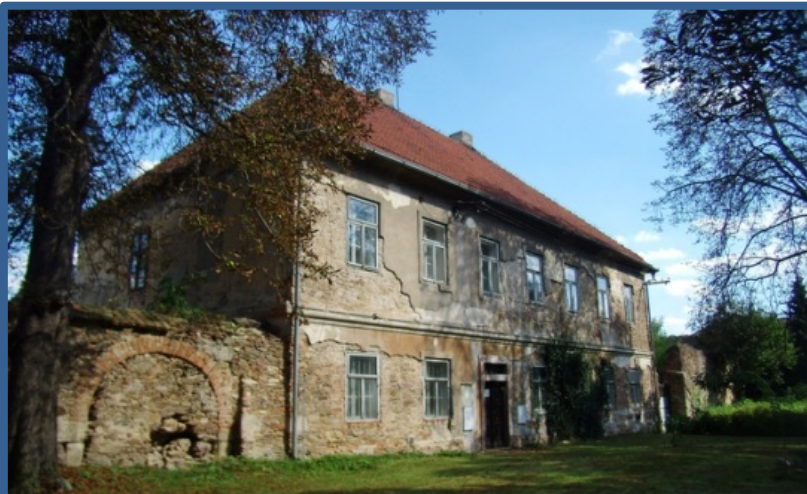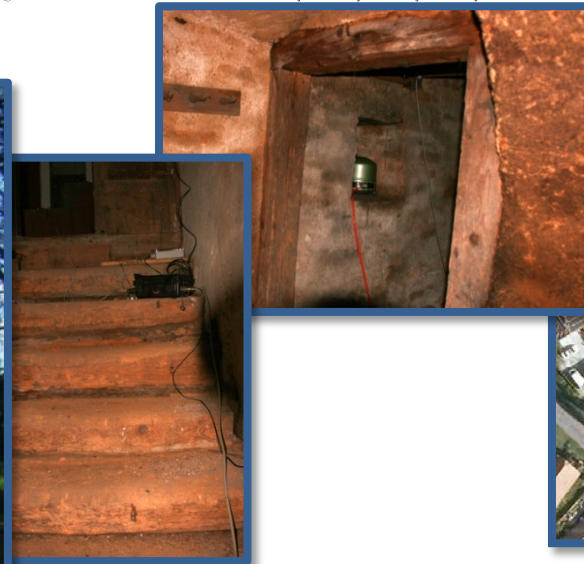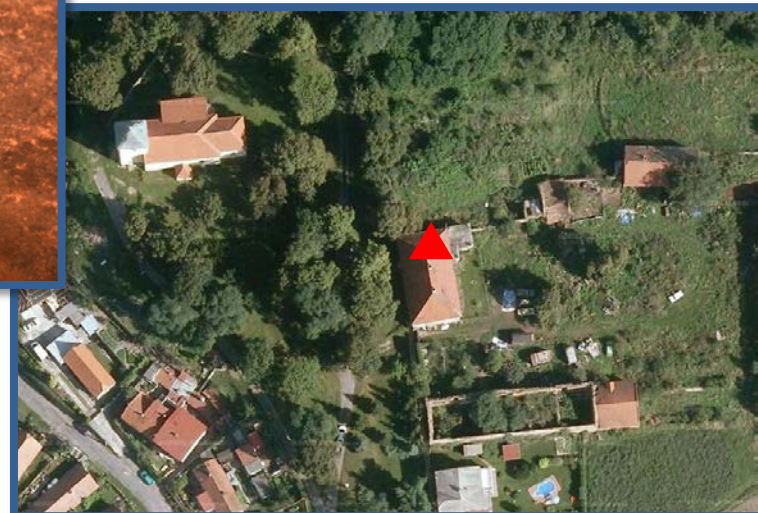

Supplement: Supplementary file 1 [file gi-2017-7-supplement.zip]
