# Supplementary material for: Data quality control and tools in passive seismic experimentsexemplified on Czech broad-band seismic pool MOBNET in theAlpArray collaborative project
Source: Copernicus journal article supplement (doi:10.5194/gi-2017-7), 2017-05-15

# AAE03

## Droužkovice

### INSTALLATION

Start : 24.6.2014  
Stop : 3.9. 2015  
Lat : 50.4306  
Lon : 13.4300  
Alt : 305 m

### EQUIPMENT

Sensor : CMG 40T 30 s  
Depth : 0 m  
Recorder : Gaia 1  
Power : electricity grid  
Data : miniSeed, 6 GB

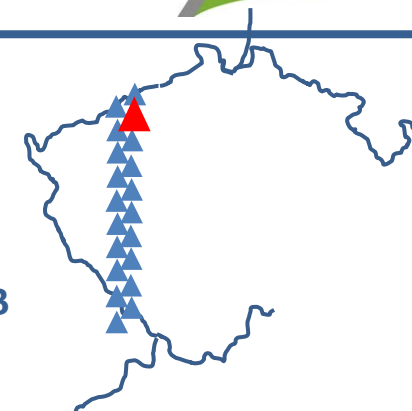

The station is located in the storeroom on the ground floor of the post office in Droužkovice.

Seismometer is built on a concrete floor.

The GPS antenna is brought out through the window, length - 5 m, direction - NE, unobstructed views.

Geomorphology: Švihov Highlands.

Bedrock: loess.

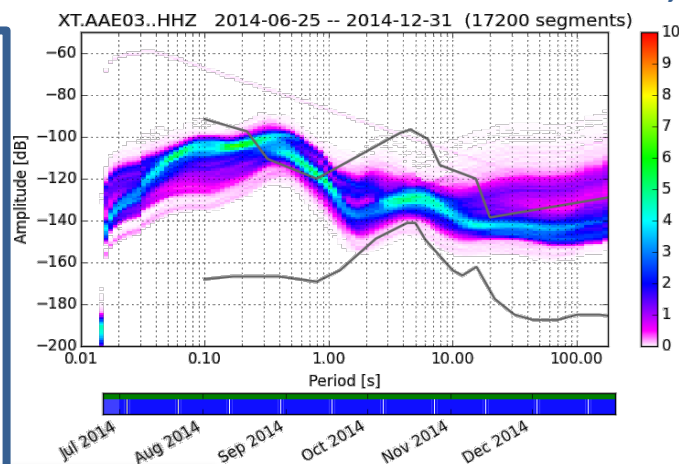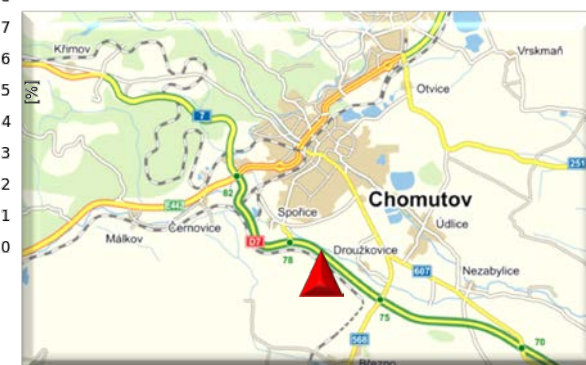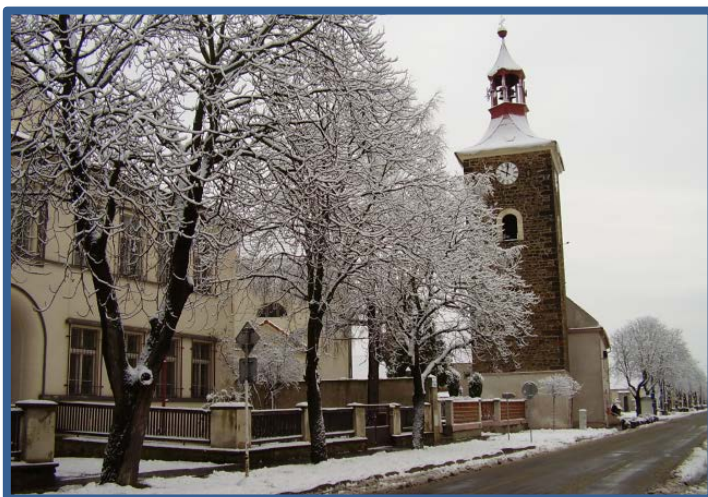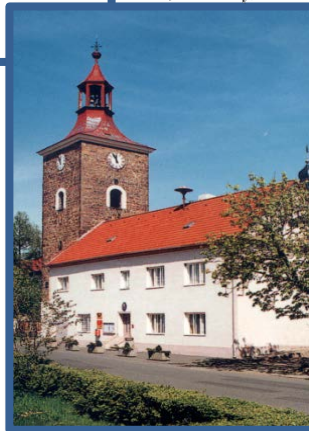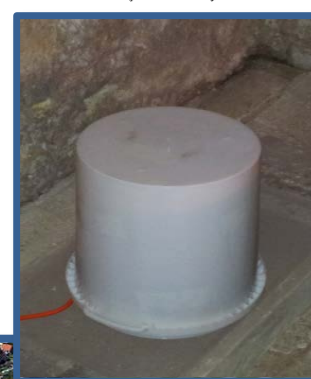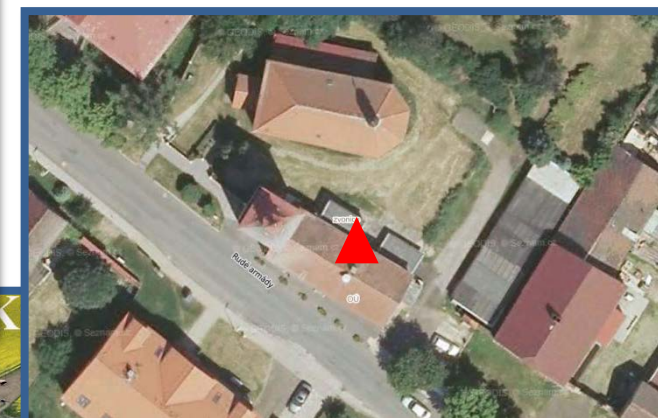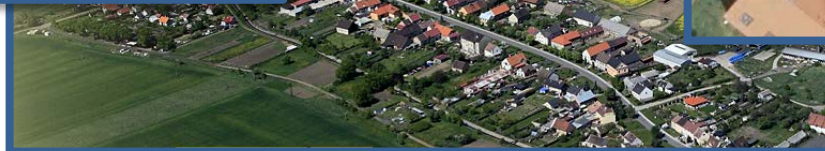

Supplement: Supplementary file 2 [file gi-2017-7-supplement.zip]
