# Supplementary material for: Data quality control and tools in passive seismic experimentsexemplified on Czech broad-band seismic pool MOBNET in theAlpArray collaborative project
Source: Copernicus journal article supplement (doi:10.5194/gi-2017-7), 2017-05-15

# A089A

## Nesovice

### INSTALLATION

Start : 8.11.2015  
 Lat : 49.1520  
 Lon : 17.0920  
 Alt : 263 m

### EQUIPMENT

Sensor : STS 2 120 s  
 Depth : 3 m  
 Recorder : Gaia 1  
 Power : electricity grid

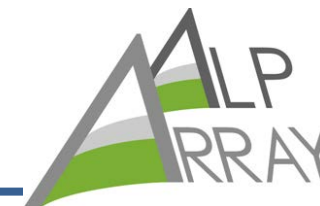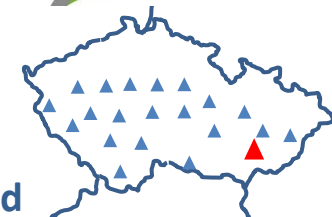

The station is located in the cellar below the chateau Nové Zámky in Nesovice. The cellar is not used.

Seismometer situated on the concrete floor. The GPS antenna is brought out through the window, length - 5 m, direction S, unlimited view.

Geomorphology: Litenčice Uplands.  
 Subsoil: sandstone, conglomerate.

Z3.A089A..HHZ 2015-11-08 -- 2015-12-02 (1192 segments)

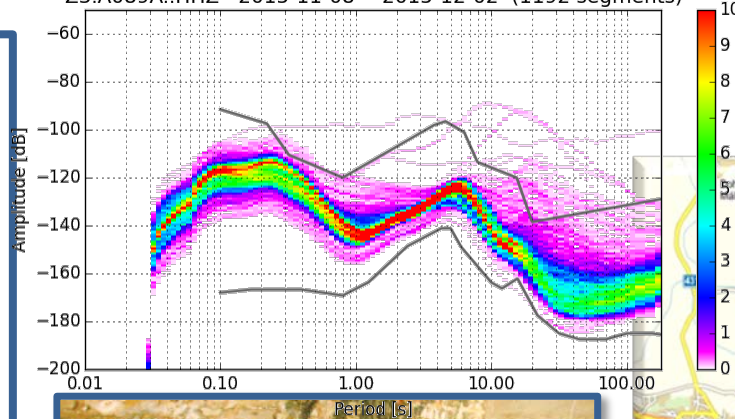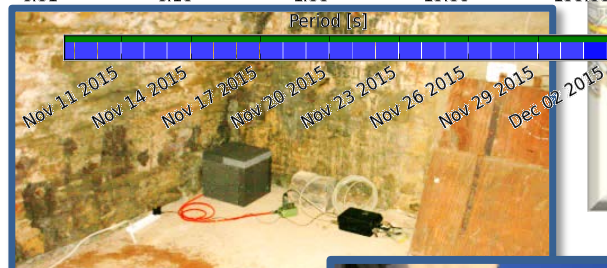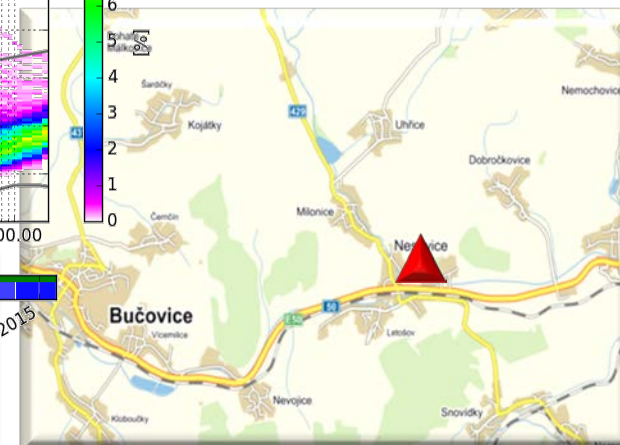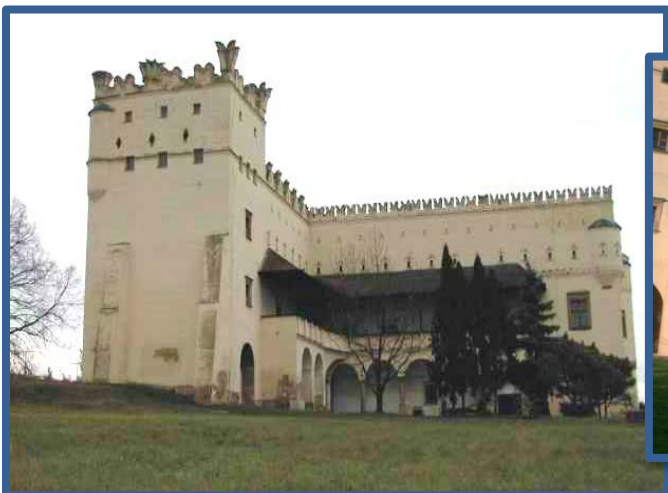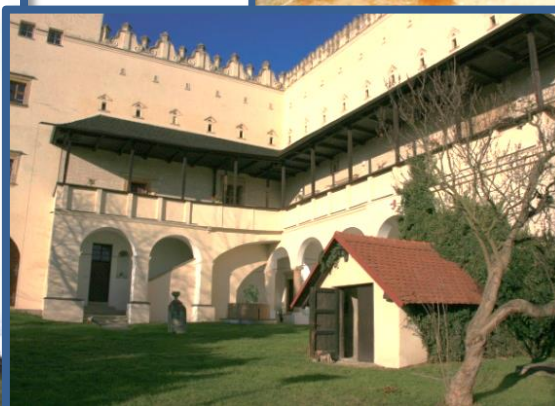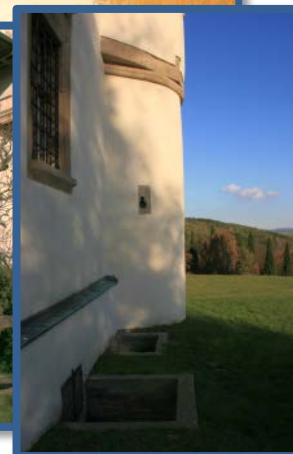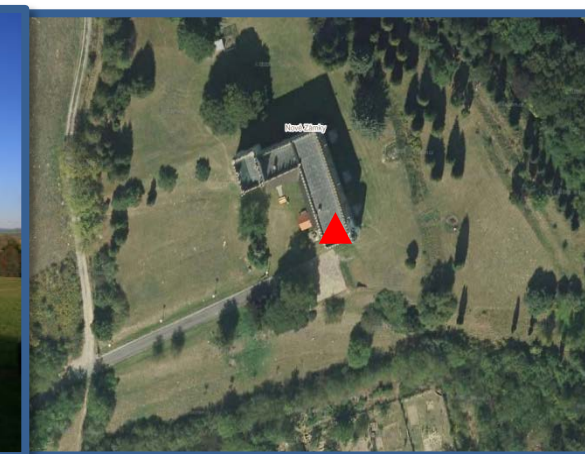

Supplement: Supplementary file 3 [file gi-2017-7-supplement.zip]
