# Supplementary material for: Data quality control and tools in passive seismic experimentsexemplified on Czech broad-band seismic pool MOBNET in theAlpArray collaborative project
Source: Copernicus journal article supplement (doi:10.5194/gi-2017-7), 2017-05-15

# A075A

## Křivoklát

### INSTALLATION

Start : 6.10.2015  
Lat : 50.0377  
Lon : 13.8737  
Alt : 285 m

### EQUIPMENT

Sensor : STS 2 120 s  
Depth : 0 m  
Recorder : Gaia 1  
Power : electricity grid

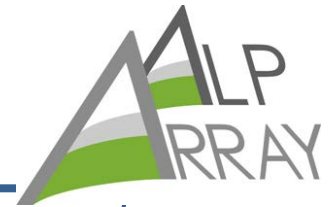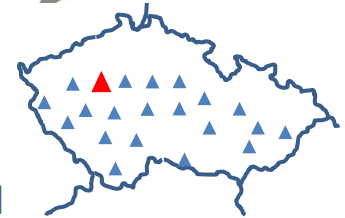

The station is located on the ground floor of a former brewery in the castle Křivoklát. The surrounding areas are not used.

Seismometer is built on a concrete floor

The GPS antenna is brought out by entrance gate, length - 5 m, direction - S, view open.

Geomorphology: Křivoklát Highlands.

Subsoil: greywacke, siltstone, slate.

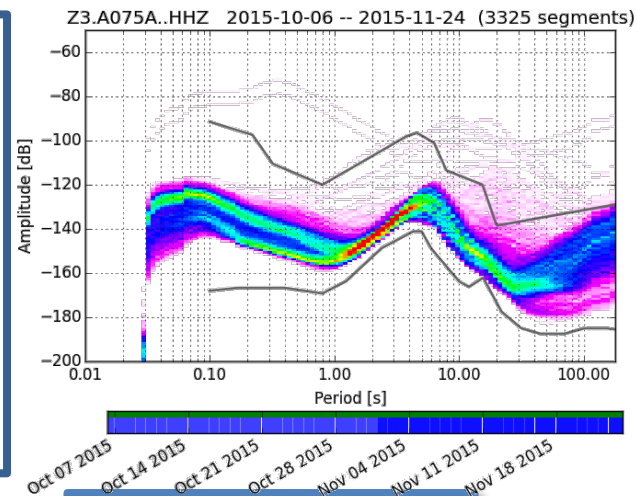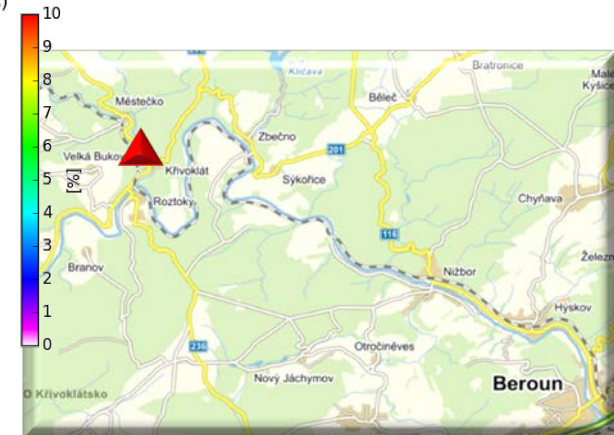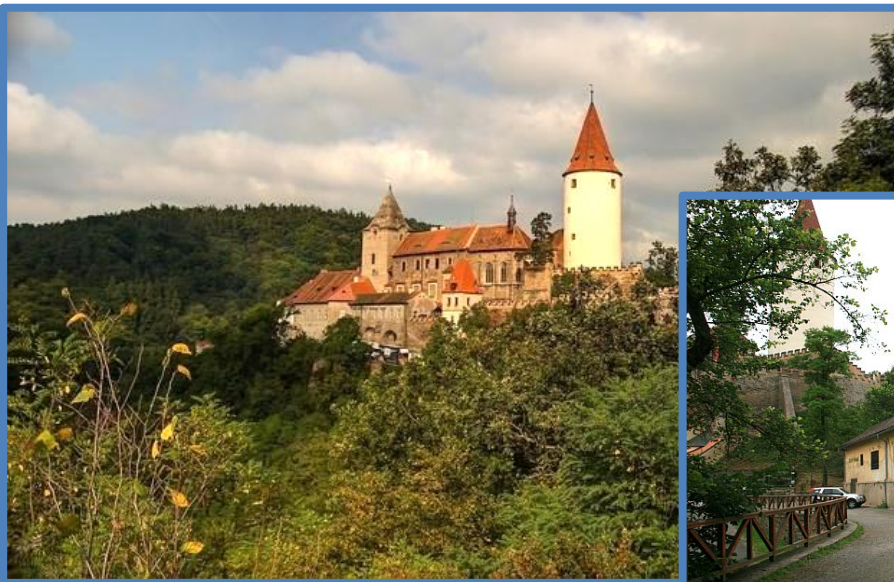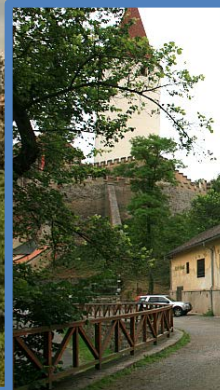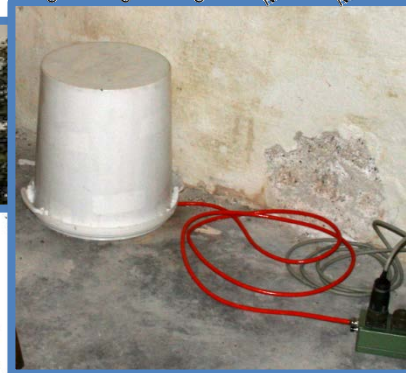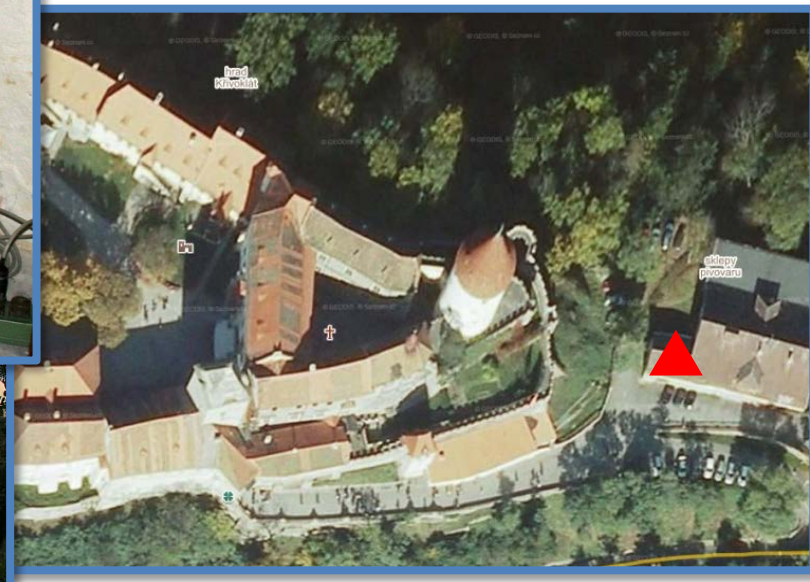

Supplement: Supplementary file 4 [file gi-2017-7-supplement.zip]
