# Supplementary material for: Data quality control and tools in passive seismic experimentsexemplified on Czech broad-band seismic pool MOBNET in theAlpArray collaborative project
Source: Copernicus journal article supplement (doi:10.5194/gi-2017-7), 2017-05-15

A080A

Loreta

## INSTALLATION

Start : 12.10.2015

Lat : 49.6840

Lon : 14.9288

Alt : 502 m

## EQUIPMENT

Sensor : STS 2 120 s

Depth : 0 m

Recorder : Gaia 1

Power : electricity grid

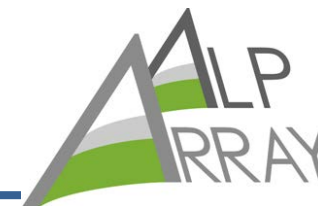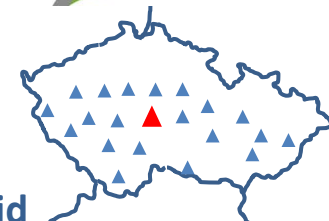

The station is located on the ground floor of the former rectory near the pilgrimage church Loreta. Part of the building is occasionally used for recreational purposes. Seismometer is built on a concrete floor. The GPS antenna is brought out through the window, length - 5 m, direction - NW, open views.

Geomorphology: Vlašim Uplands.

Subsoil: paragneiss.

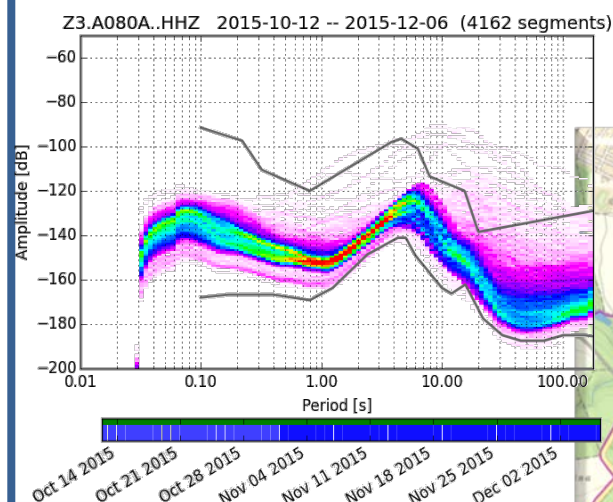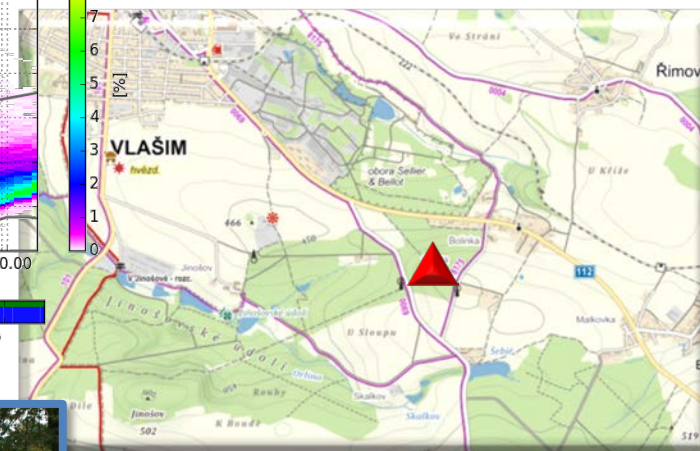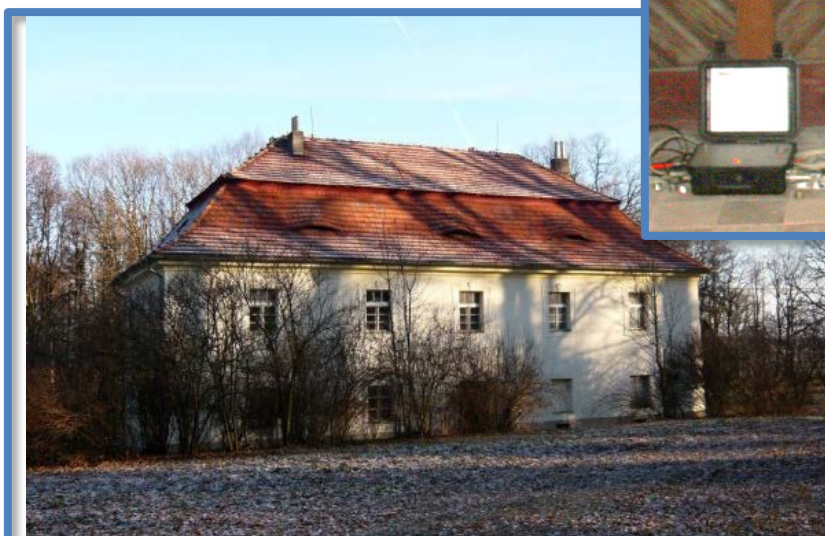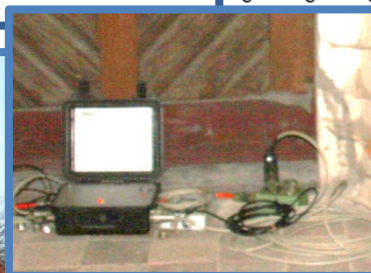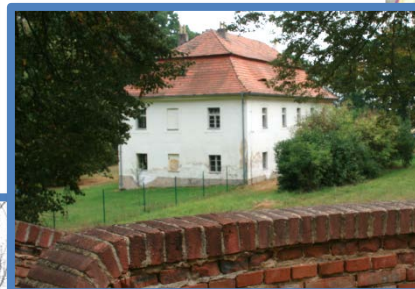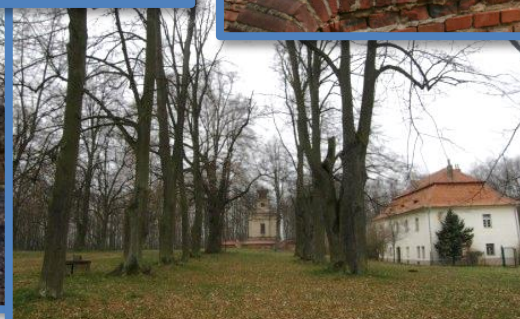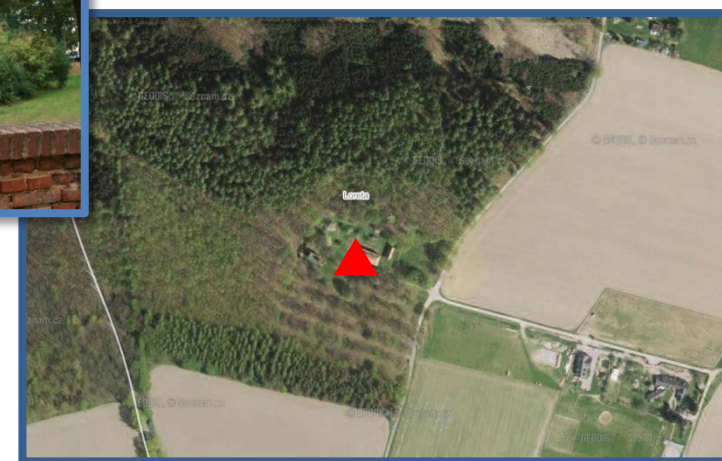

Supplement: Supplementary file 5 [file gi-2017-7-supplement.zip]
