# Supplementary material for: Data quality control and tools in passive seismic experimentsexemplified on Czech broad-band seismic pool MOBNET in theAlpArray collaborative project
Source: Copernicus journal article supplement (doi:10.5194/gi-2017-7), 2017-05-15

# AAE18

## Schwellhäusl

### INSTALLATION

### EQUIPMENT

|                   |                          |
|-------------------|--------------------------|
| Start : 28.8.2014 | Sensor : STS 2 120 s     |
| Stop : 10.9.2015  | Depth : 0 m              |
| Lat : 49.0981     | Recorder : Gaia 1        |
| Lon : 13.2165     | Power : electricity grid |
| Alt : 675 m       | Data : miniSeed, 6 GB    |

The station is located in a detached cellar near tourist restaurant Schwellhäusl.  
Seismometer is built on a concrete floor.  
The GPS antenna is brought out through the window, length - 5 m, omnidirectional view, partially obscured.  
Geomorphology: Bayerischer Wald.  
Subsoil: paragneiss.

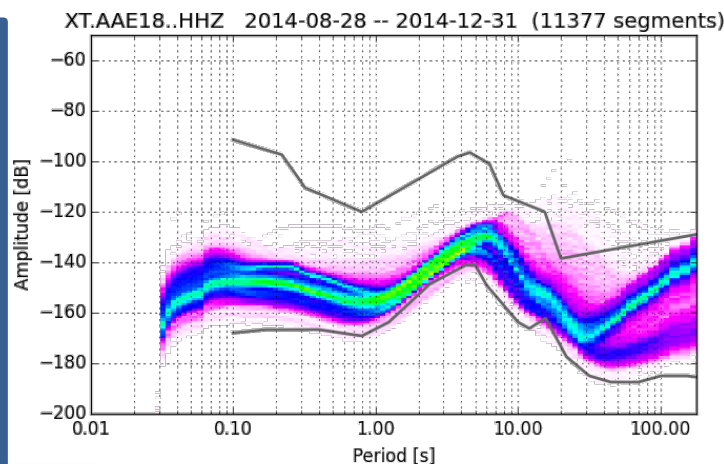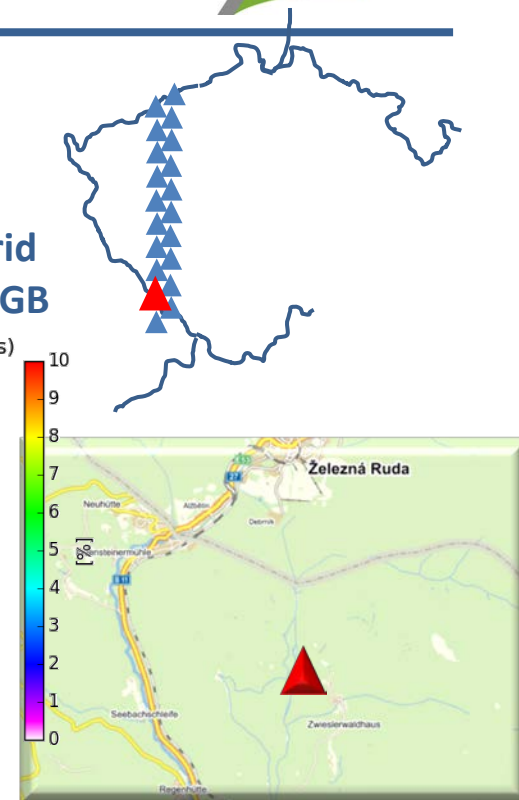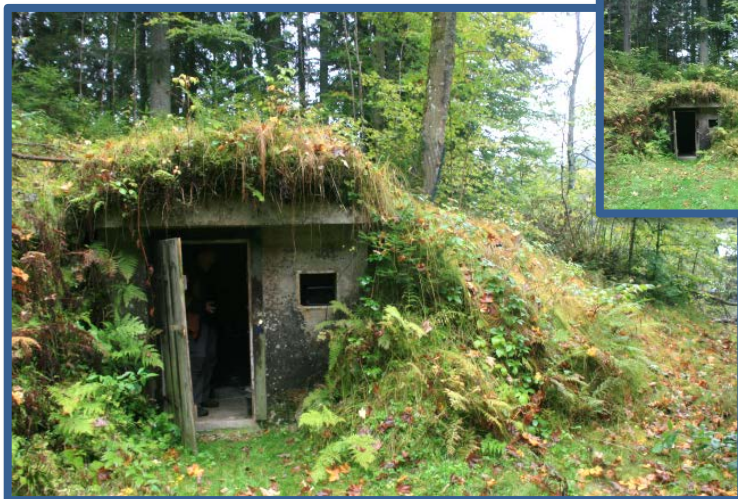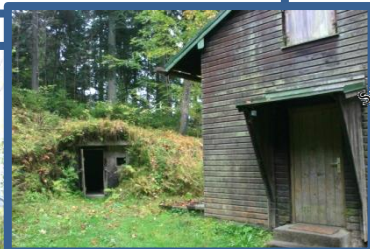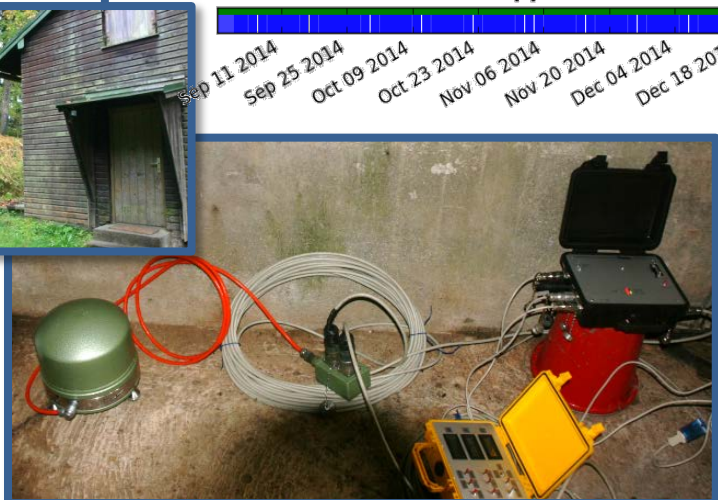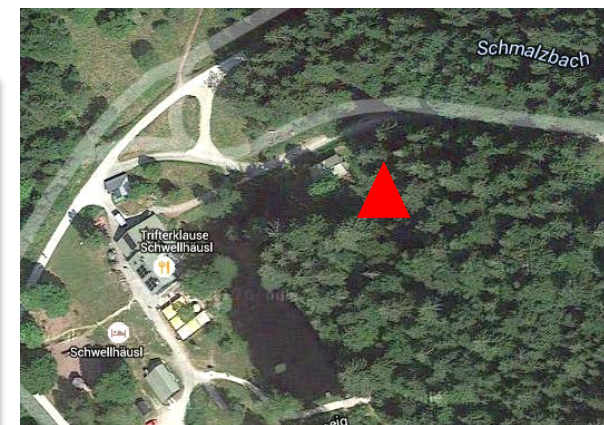

Supplement: Supplementary file 6 [file gi-2017-7-supplement.zip]
