# Supplementary material for: Data quality control and tools in passive seismic experimentsexemplified on Czech broad-band seismic pool MOBNET in theAlpArray collaborative project
Source: Copernicus journal article supplement (doi:10.5194/gi-2017-7), 2017-05-15

**AAE02**

**Hora Sv. Šebestiána**

## INSTALLATION

Start : 24.6.2014  
Stop : 3.9.2015  
Lat : 50.5107  
Lon : 13.2526  
Alt : 843 m

## EQUIPMENT

Sensor : STS 2 120 s  
Depth : 3 m  
Recorder : Gaia 1  
Power : electricity grid  
Data : miniSeed, 6 GB

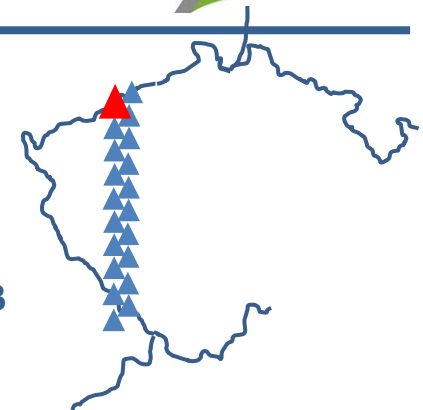

The station is located under the building of the municipal office in a disused cellar. Seismometer is built on the concrete floor. The GPS antenna is brought out down the hallway to the first floor and out of the window, length - 20 m, the view toward SE, free views.

Geomorphology: Ore Mountains.  
Subsoil: paragneiss.

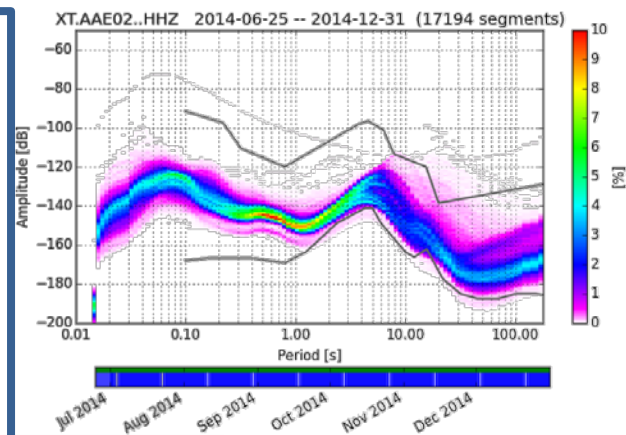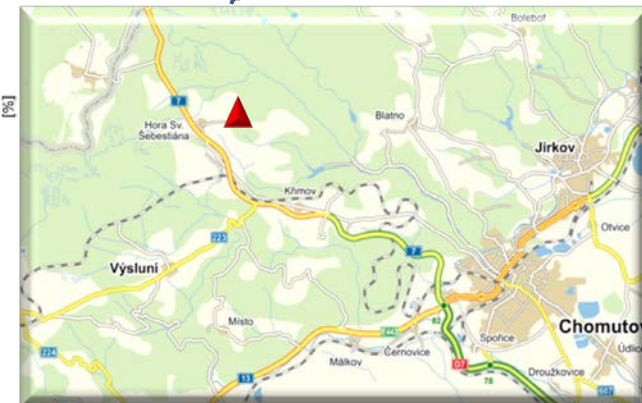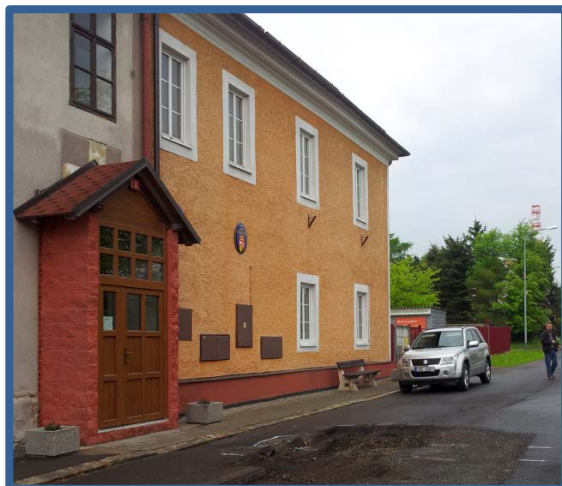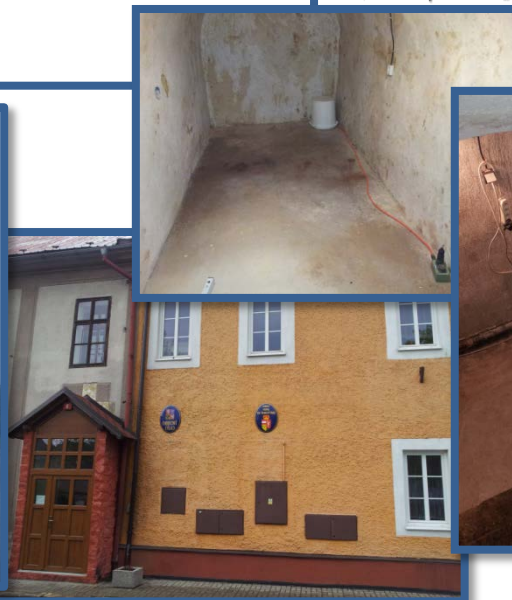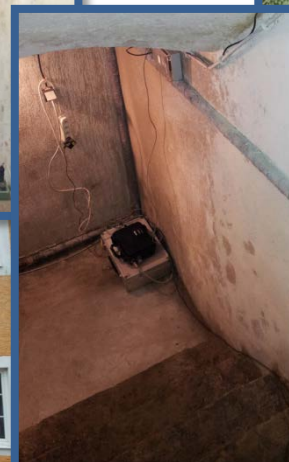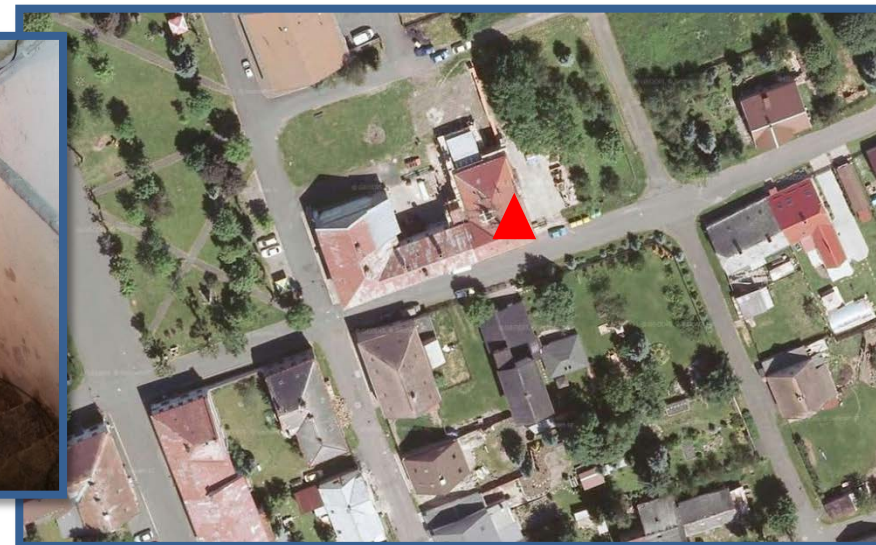

Supplement: Supplementary file 7 [file gi-2017-7-supplement.zip]
