# Supplementary material for: Data quality control and tools in passive seismic experimentsexemplified on Czech broad-band seismic pool MOBNET in theAlpArray collaborative project
Source: Copernicus journal article supplement (doi:10.5194/gi-2017-7), 2017-05-15

**A087A**

**Bouzov**

## INSTALLATION

Start : 19.9.2015

Lat : 49.7049

Lon : 16.8893

Alt : 430 m

## EQUIPMENT

Sensor : STS 2 120 s

Depth : 0 m

Recorder : Gaia 3

Power : electricity grid

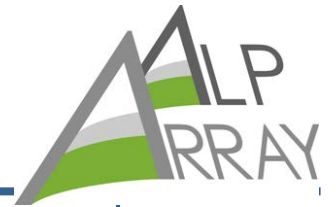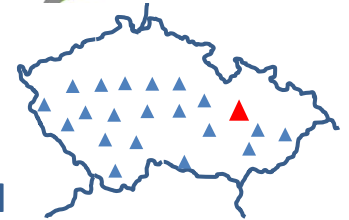

The station is located in the lapidary in the castle Bouzov. The room is 3 m below the castle courtyard.

Seismometer is placed on a concrete floor covered with ceramic tiles.

The GPS antenna is mounted on the inner side of the window. The iron bars is before the window, length - 5 m, direction S, limited the view is limited to the east.

Geomorphology: Zábřeh Highlands.

Subsoil: greywacke.

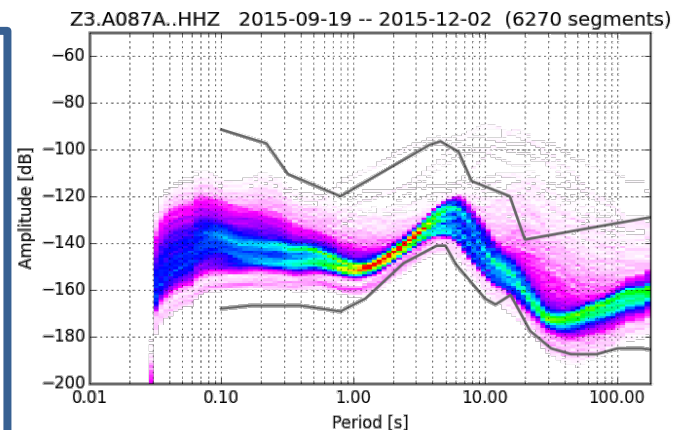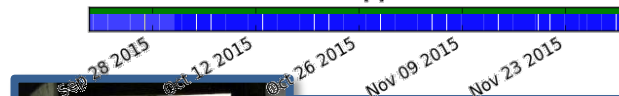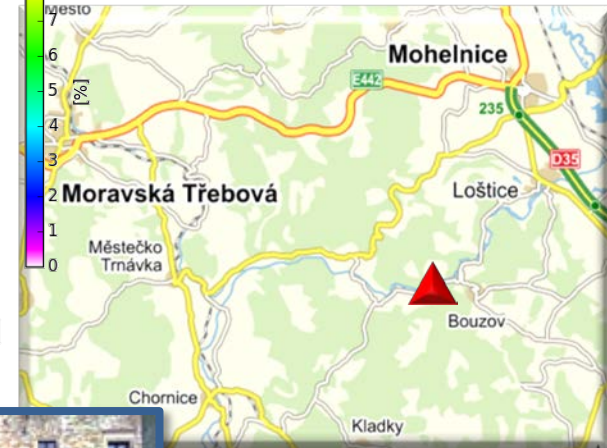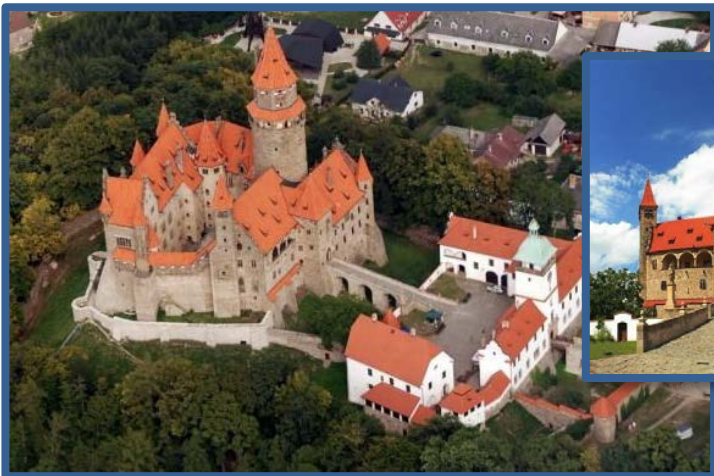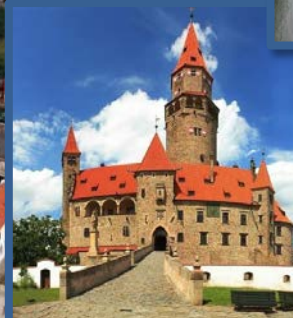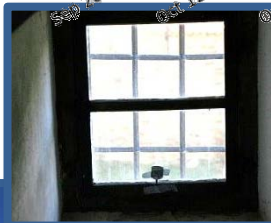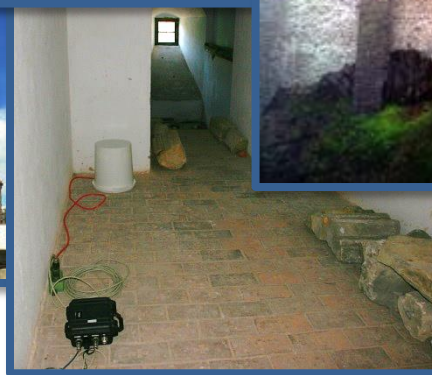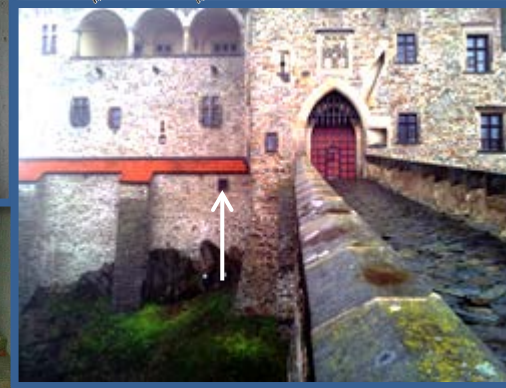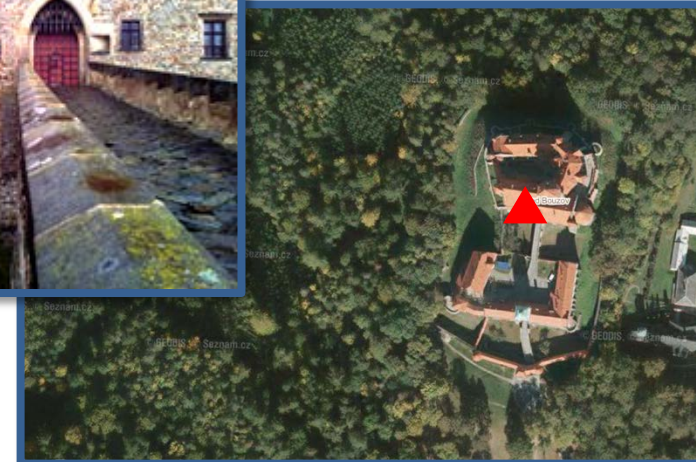

Supplement: Supplementary file 8 [file gi-2017-7-supplement.zip]
