# Supplementary material for: Data quality control and tools in passive seismic experimentsexemplified on Czech broad-band seismic pool MOBNET in theAlpArray collaborative project
Source: Copernicus journal article supplement (doi:10.5194/gi-2017-7), 2017-05-15

# A086A

## Nové Hrady

The station is located in the cellar of the chateau Nové Zámky. The cellar is used as a warehouse compote.

Seismometer is placed on the hard thick stone slab lying on the paving of brick.

The GPS antenna is brought out through the window, length - 5 m, direction S, open view.

Geomorphology: Svitavy Uplands.

Subsoil: clay calcareous sandstone.

### INSTALLATION

Start : 19.9.2015

Lat : 49.8528

Lon : 16.1457

Alt : 391 m

### EQUIPMENT

Sensor : STS 2 120 s

Depth : 2 m

Recorder : Gaia 1

Power : electricity grid

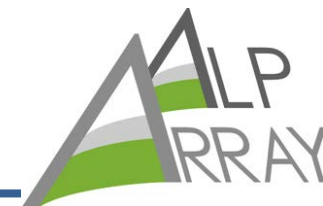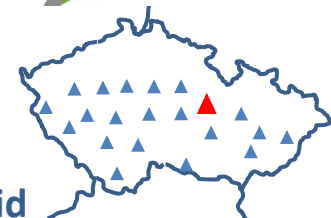

Z3.A086A..HHZ 2015-09-19 -- 2015-12-02 (5850 segments)

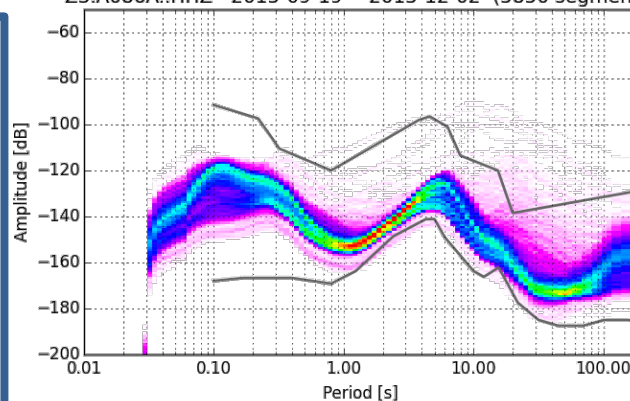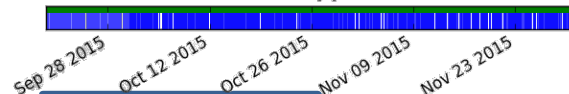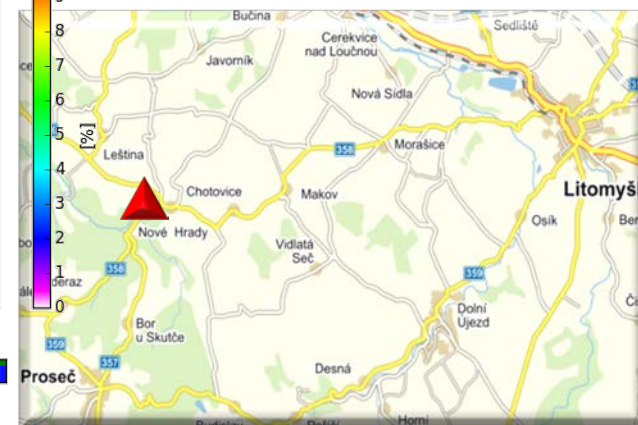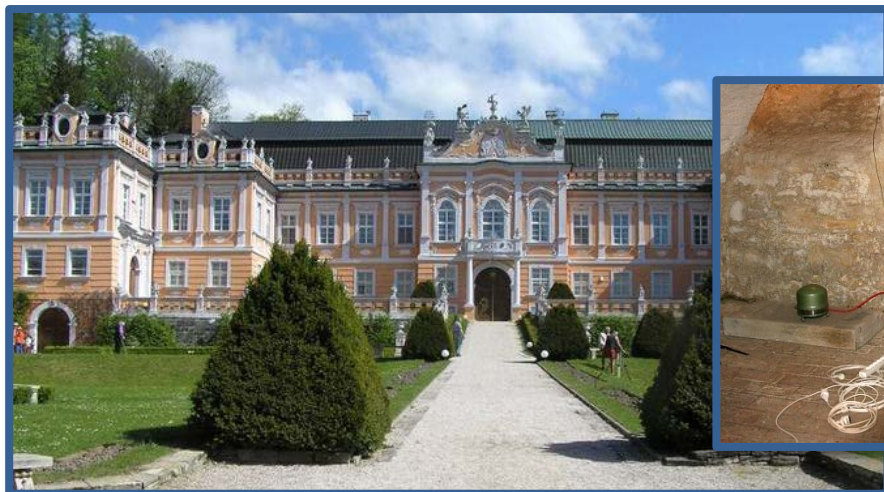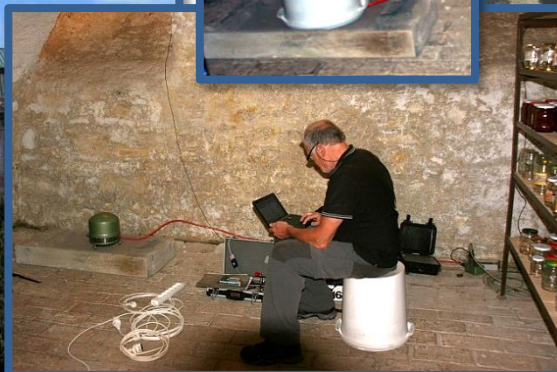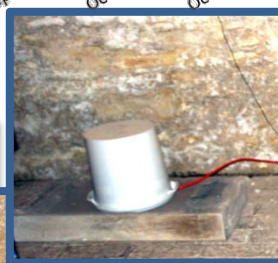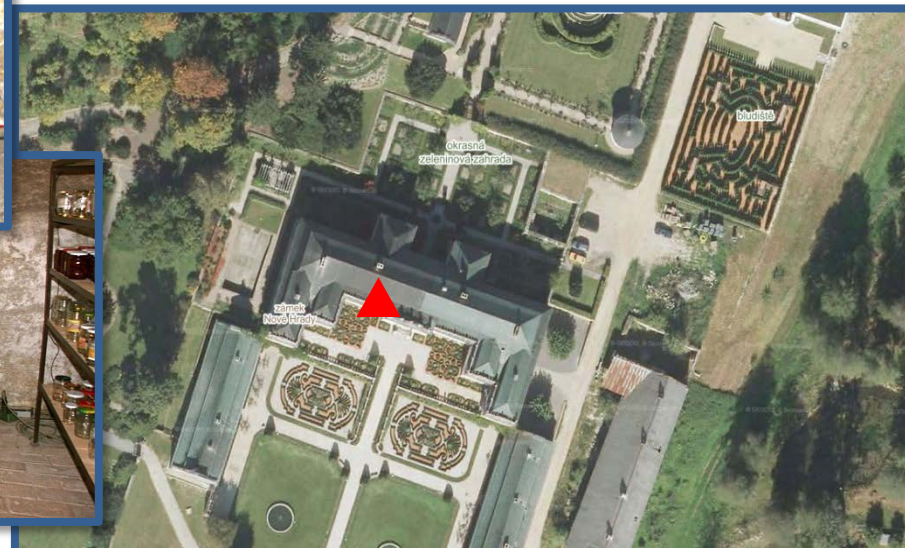

Supplement: Supplementary file 9 [file gi-2017-7-supplement.zip]
