# Supplementary material for: Data quality control and tools in passive seismic experimentsexemplified on Czech broad-band seismic pool MOBNET in theAlpArray collaborative project
Source: Copernicus journal article supplement (doi:10.5194/gi-2017-7), 2017-05-15

# AAE12 Dnešice

## INSTALLATION

## EQUIPMENT

|                   |                          |
|-------------------|--------------------------|
| Start : 10.7.2014 | Sensor : STS 2 120 s     |
| Stop : 2.10.2015  | Depth : 2 m              |
| Lat : 49.6045     | Recorder : Gaia 1        |
| Lon : 13.2629     | Power : electricity grid |
| Alt : 360 m       | Data : miniSeed, 6 GB    |

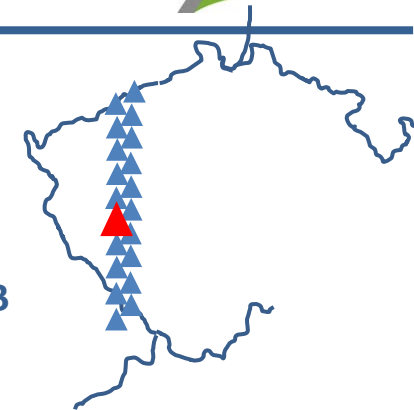

The station is located in the cellar of the municipal office in the village Dnešice. Seismometer is built on a concrete floor. The GPS antenna is brought out through the window, length - 5 m, direction - W, the view partially obscured. Geomorphology: Švihov Highlands. Subsoil: floodplain sediment.

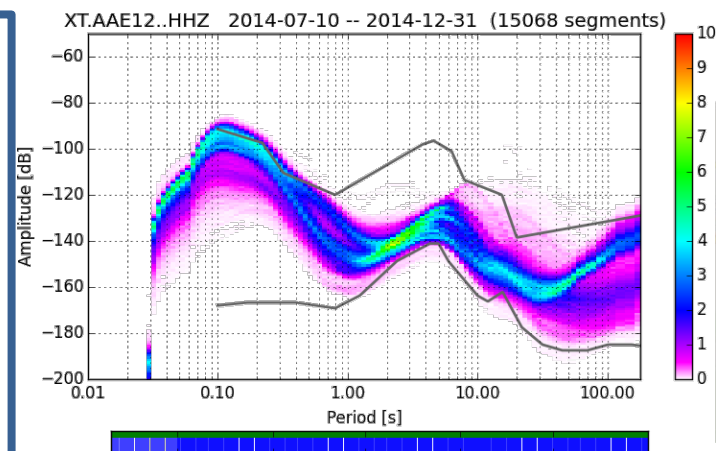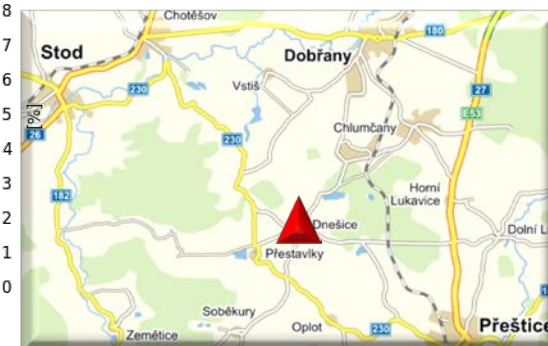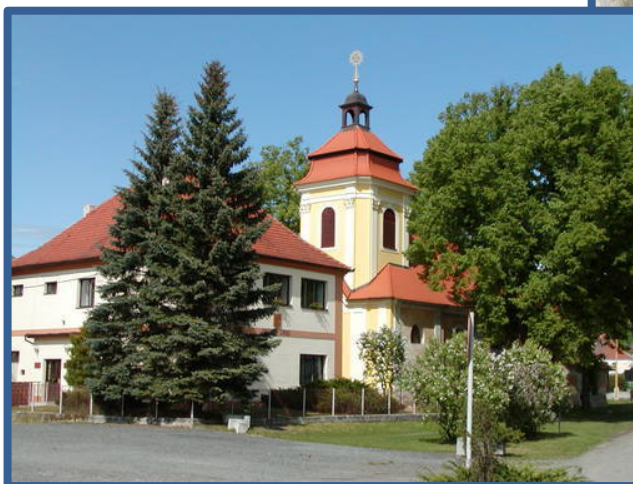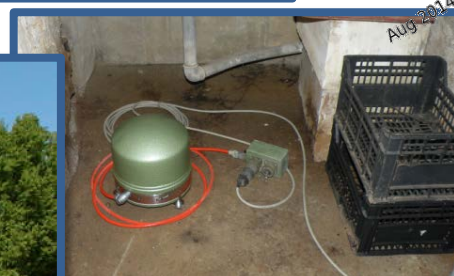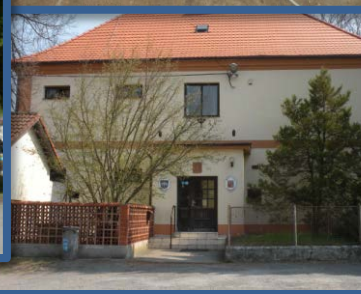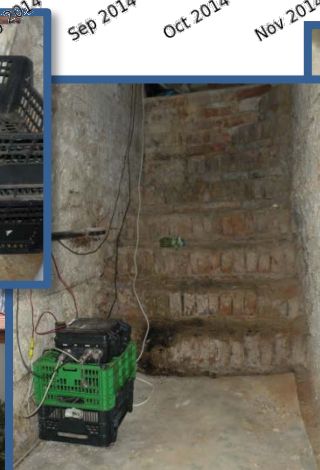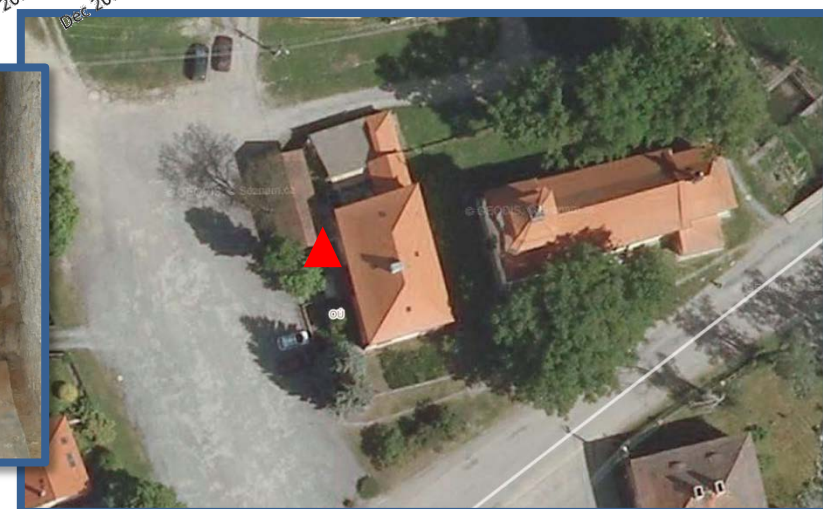

Supplement: Supplementary file 10 [file gi-2017-7-supplement.zip]
