# Supplementary material for: Data quality control and tools in passive seismic experimentsexemplified on Czech broad-band seismic pool MOBNET in theAlpArray collaborative project
Source: Copernicus journal article supplement (doi:10.5194/gi-2017-7), 2017-05-15

# AAE15 Zdebořice

## INSTALLATION

Start : 17.7.2014  
Stop : 13.9.2015  
Lat : 49.3648  
Lon : 13.4141  
Alt : 680 m

## EQUIPMENT

Sensor : STS 2 120 s  
Depth : 0m  
Recorder : Gaia 1  
Power : electricity grid  
Data : miniSeed, 6 GB

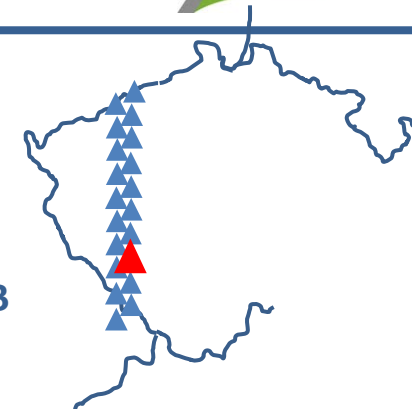

The station is located in the sacristy of the church St. Giles in the village Zdebořice. Seismometer is built on a stone floor. The GPS antenna is brought out through the window, length - 5 m, direction - N, the view is free. Geomorphology: Blatná Uplands. Subsoil: paragneiss.

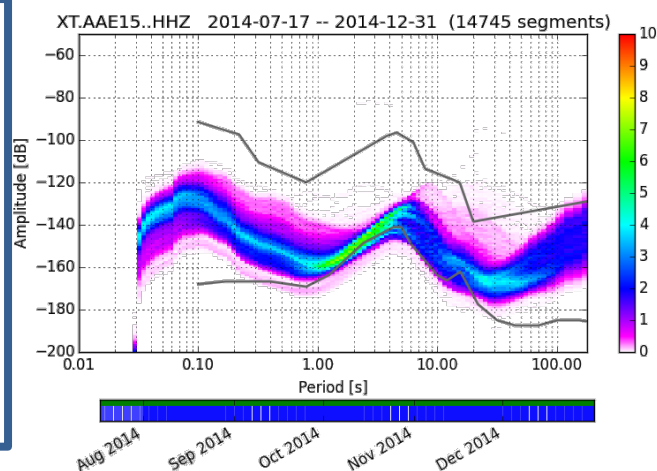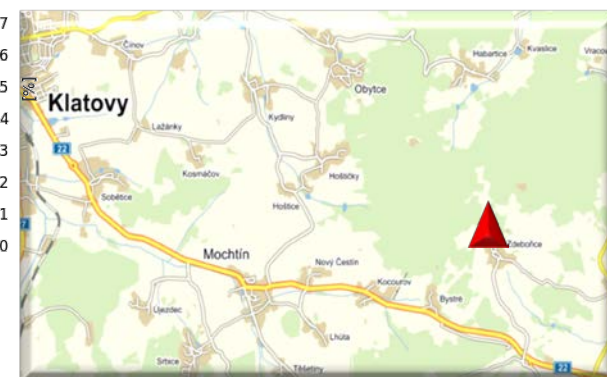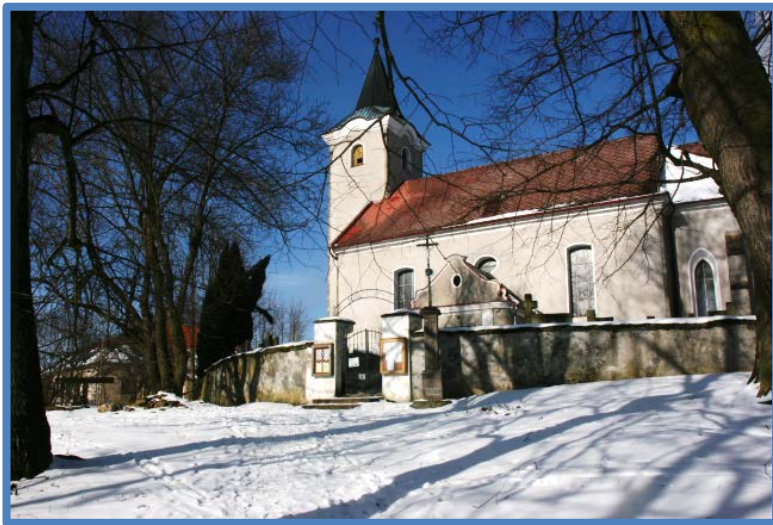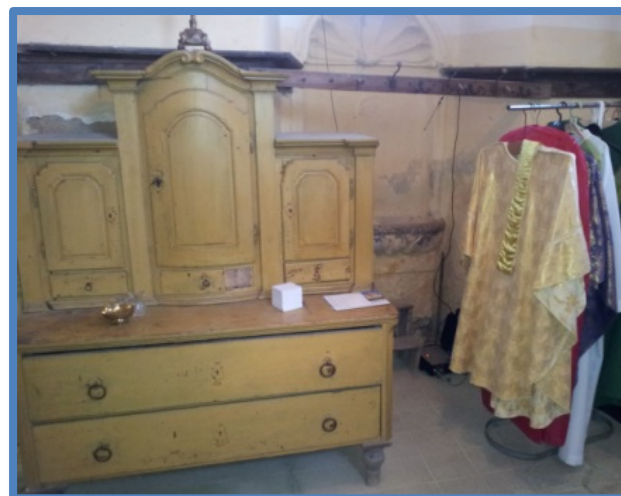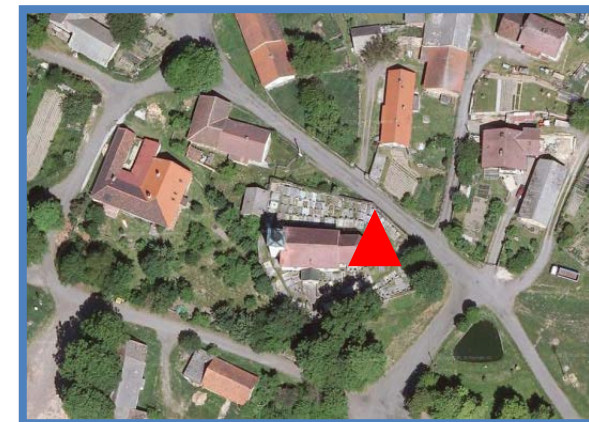

Supplement: Supplementary file 11 [file gi-2017-7-supplement.zip]
