# Supplementary material for: Data quality control and tools in passive seismic experimentsexemplified on Czech broad-band seismic pool MOBNET in theAlpArray collaborative project
Source: Copernicus journal article supplement (doi:10.5194/gi-2017-7), 2017-05-15

# A079A

## Dráchov

### INSTALLATION

Start : 15.10.2015  
 Lat : 49.2288  
 Lon : 14.7074  
 Alt : 438 m

### EQUIPMENT

Sensor : STS 2 120 s  
 Depth : 0 m  
 Recorder : Gaia 3  
 Power : electricity grid

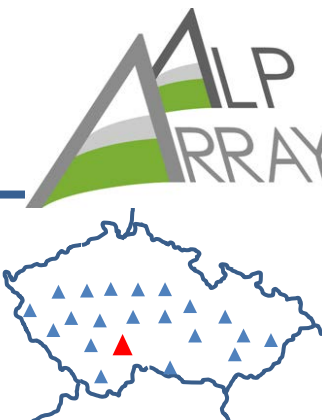

The station is located in the sacristy of the church St.. Wenceslas in Dráchov.  
 Seismometer is built on the floor of stone blocks.

The GPS antenna is brought out through the window, length - 5 m, direction E, open view.

Geomorphology: Třeboň Basin.

Subsoil: paragneiss.

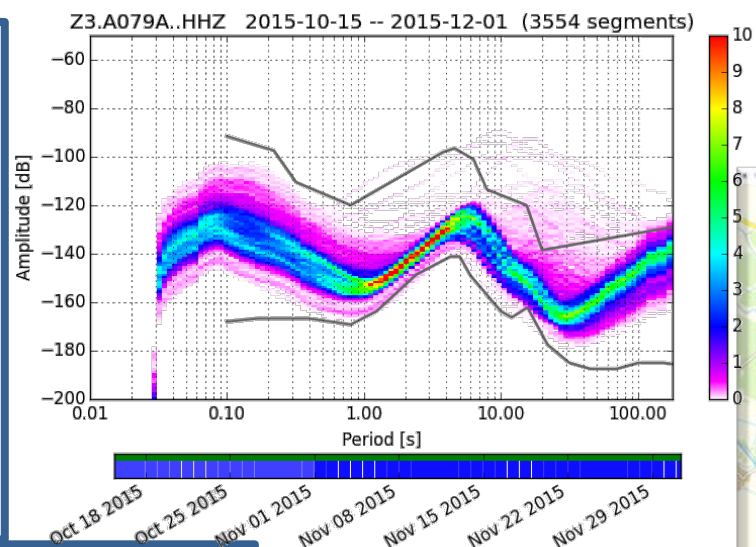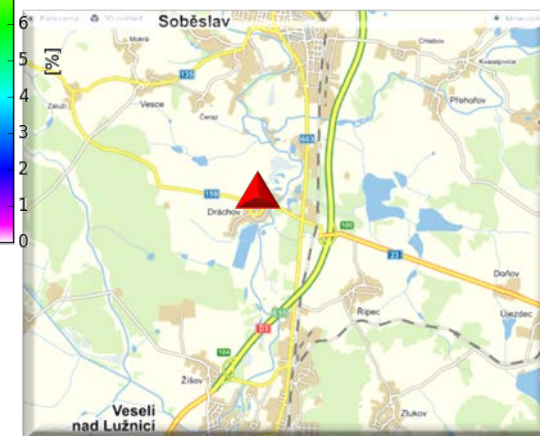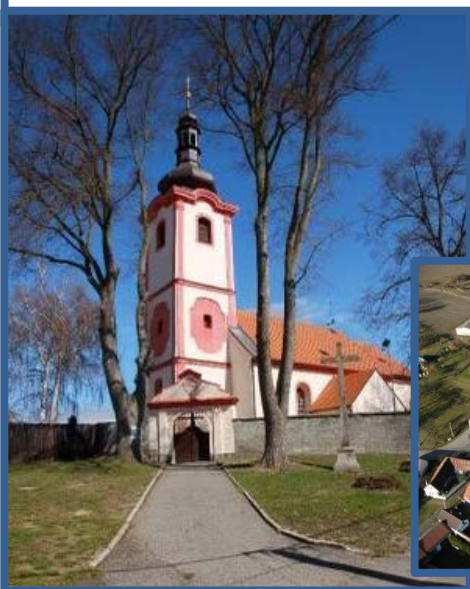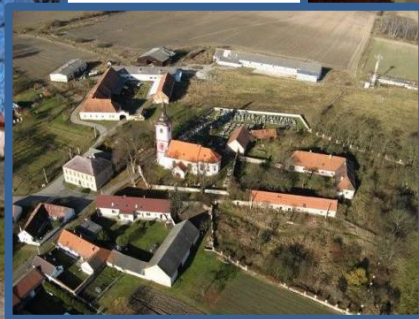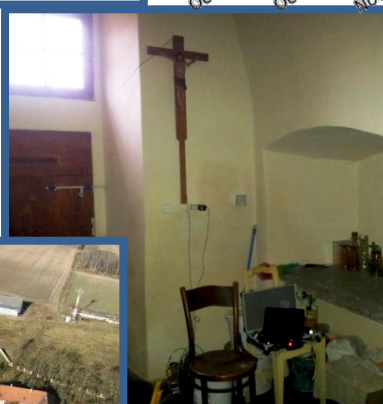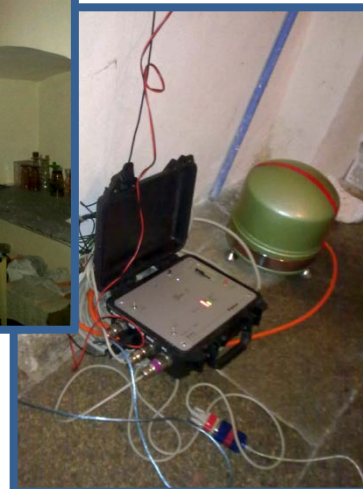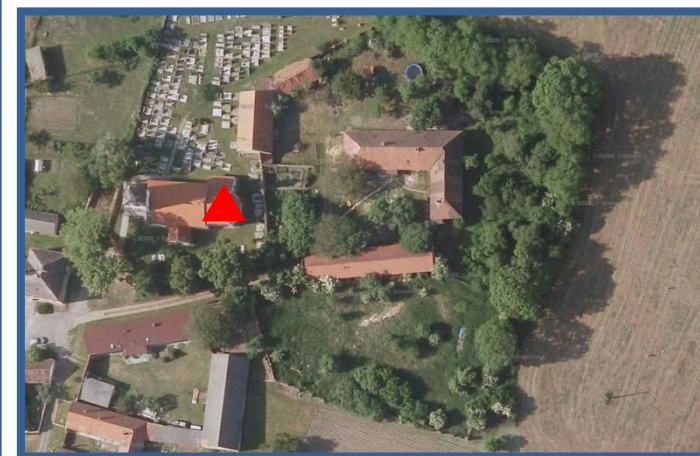

Supplement: Supplementary file 12 [file gi-2017-7-supplement.zip]
