# Supplementary material for: Data quality control and tools in passive seismic experimentsexemplified on Czech broad-band seismic pool MOBNET in theAlpArray collaborative project
Source: Copernicus journal article supplement (doi:10.5194/gi-2017-7), 2017-05-15

# AAE05

## Krásný Dvůr

### INSTALLATION

Start : 1.7.2014  
Stop : 25.8.2015  
Lat : 50.2522  
Lon : 13.3695  
Alt : 301 m

### EQUIPMENT

Sensor : STS 2 120 s  
Depth : 0 m  
Recorder : Gaia 2T  
Power : electricity grid  
Data : miniSeed, 6 GB

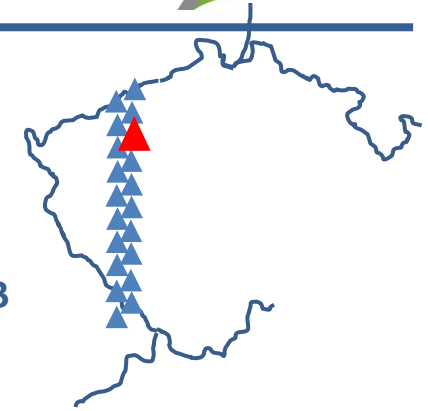

The station is located on the ground floor of the depository at Krasný Dvůr chateau.  
Seismometer is built on the stone floor.  
The GPS antenna is brought out through the window, length - 5 m, direction N, the view is free.  
Geomorphology: Most Basin.  
Subsoil: sandy loam sediment.

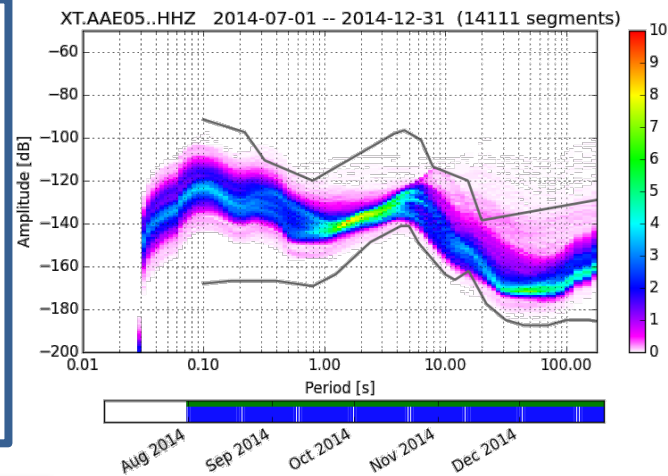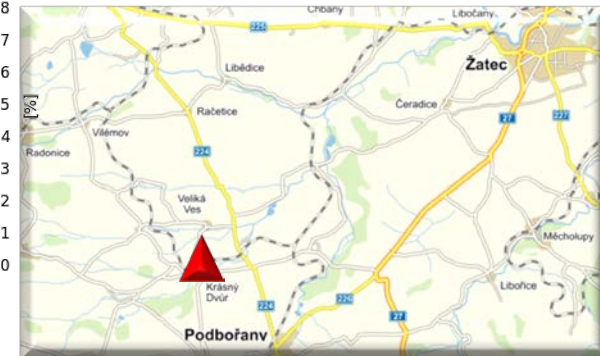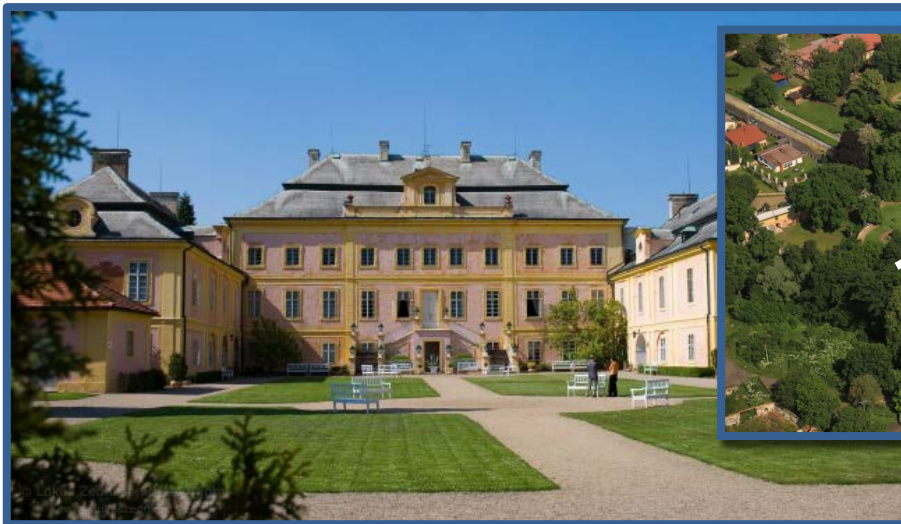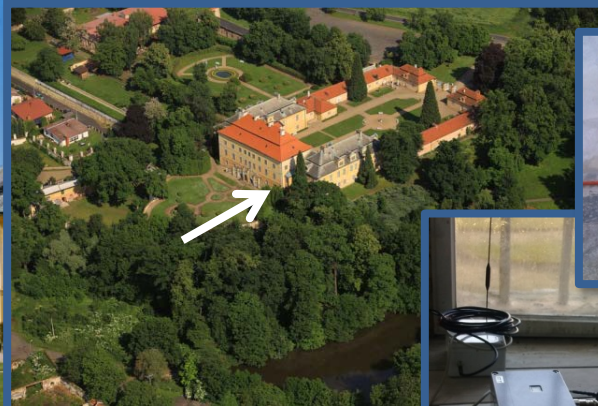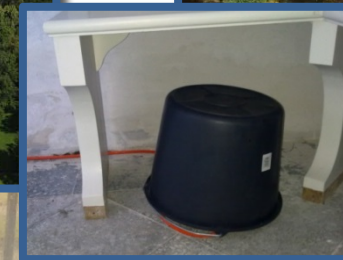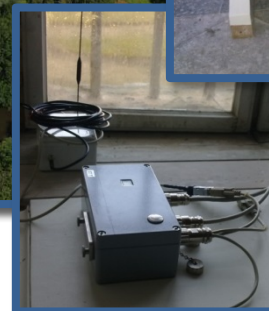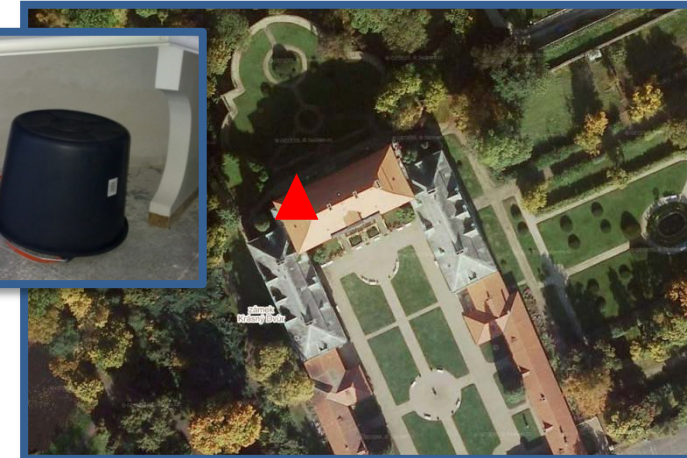

Supplement: Supplementary file 13 [file gi-2017-7-supplement.zip]
