# Supplementary material for: Data quality control and tools in passive seismic experimentsexemplified on Czech broad-band seismic pool MOBNET in theAlpArray collaborative project
Source: Copernicus journal article supplement (doi:10.5194/gi-2017-7), 2017-05-15

# AAE04

## Úhošťany

### INSTALLATION

Start : 26.7.2014  
Stop : 2015  
Lat : 50.3545  
Lon : 13.2588  
Alt : 387 m

### EQUIPMENT

Sensor : STS 2 120 s  
Depth : 0 m  
Recorder : Gaia 3  
Power : electricity grid  
Data : miniSeed, 6 GB

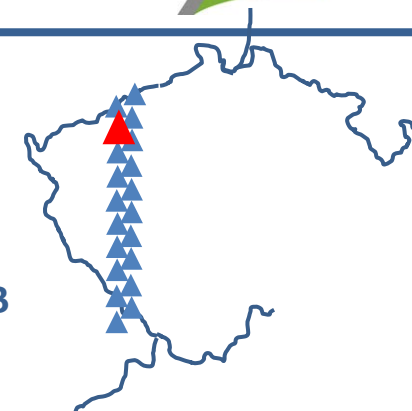

The station is located in the sacristy of the church St. Havel in Úhošťany.  
Seismometer is built on the stone floor.  
The GPS antenna is brought out through the window, length - 5 m, direction - E, the view is free.  
Geomorphology: Švihov Highlands.  
Subsoil: sandy loam sediment.

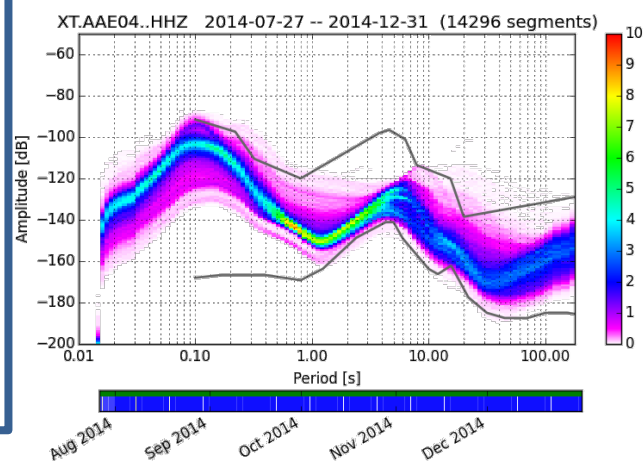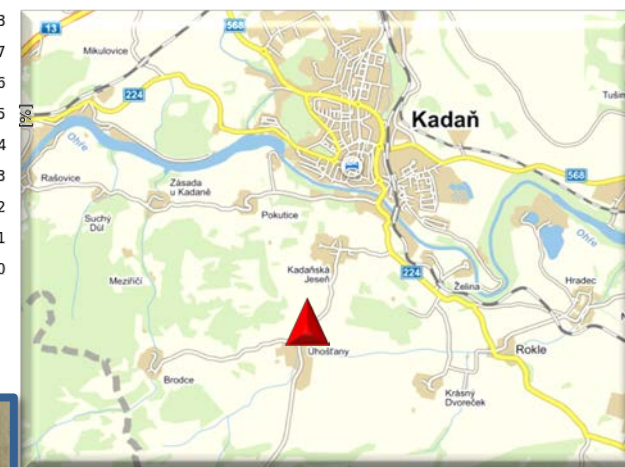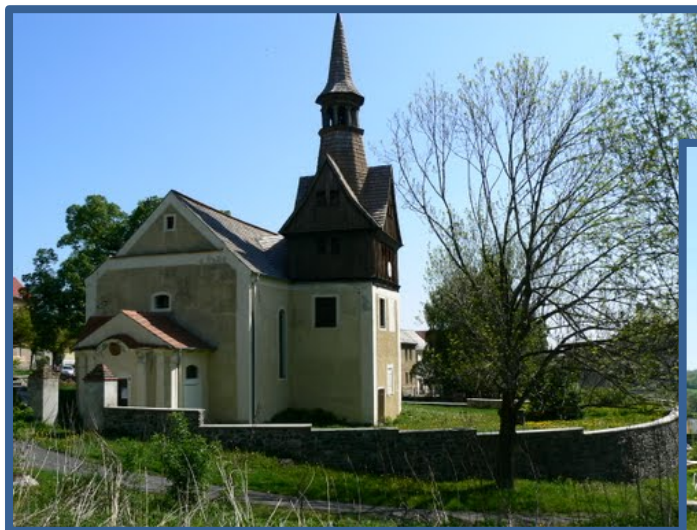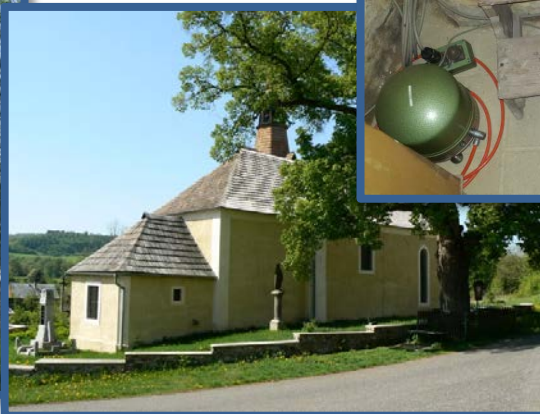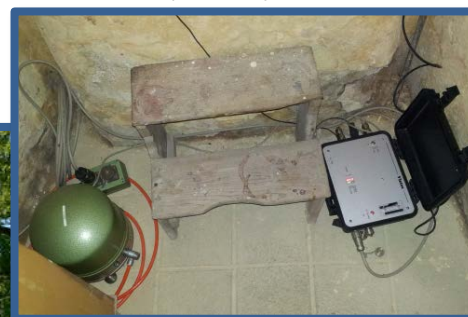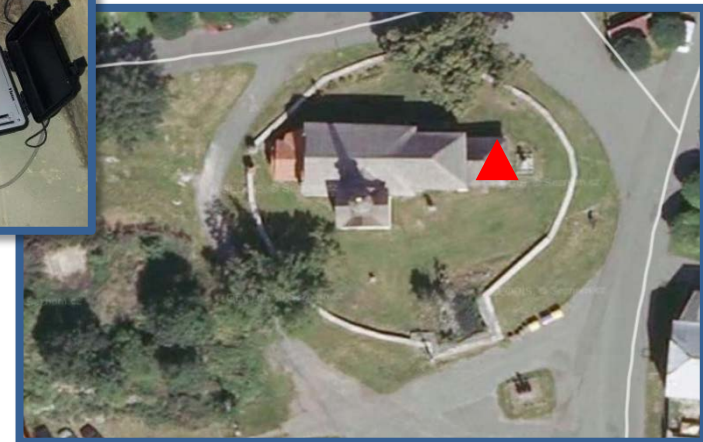

Supplement: Supplementary file 14 [file gi-2017-7-supplement.zip]
