# Supplementary material for: Data quality control and tools in passive seismic experimentsexemplified on Czech broad-band seismic pool MOBNET in theAlpArray collaborative project
Source: Copernicus journal article supplement (doi:10.5194/gi-2017-7), 2017-05-15

# AAE20

## Eppenschlag

### INSTALLATION

Start : 21.8.2014  
Stop : 10.9. 2015  
Lat : 48.8896  
Lon : 13.2980  
Alt : 580 m

### EQUIPMENT

Sensor : STS 2 120 s  
Depth : 0 m  
Recorder : Gaia 1  
Power : electricity grid  
Data : miniSeed, 6 GB

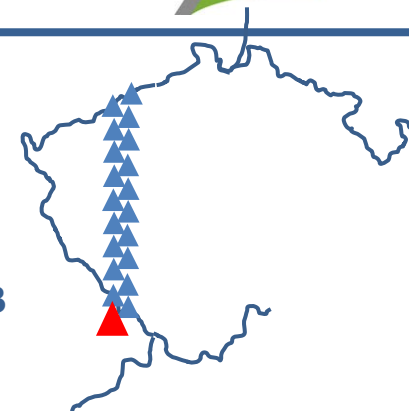

The station is located in the basement of the former town hall in the village Eppenschlag in Germany.

Seismometer is built on a concrete floor.

The GPS antenna is brought out of the front door, length - 10 m, direction - SW, the view partially obscured.

Geomorphology: Bayerischer Wald.

Subsoil: gneiss

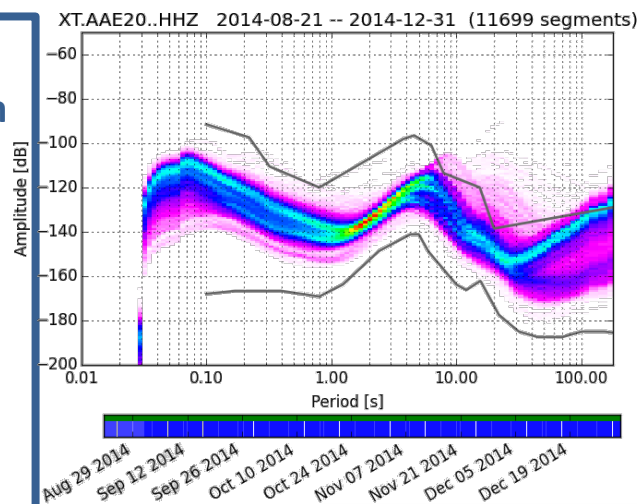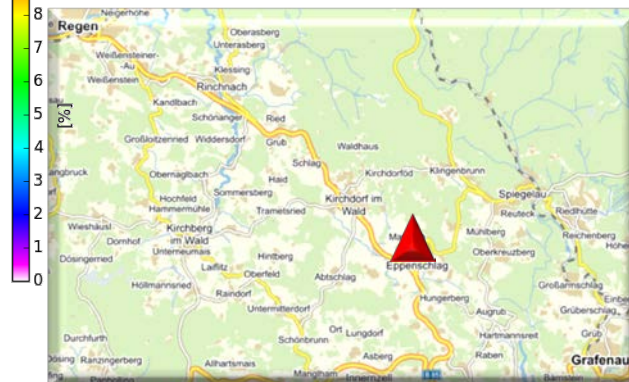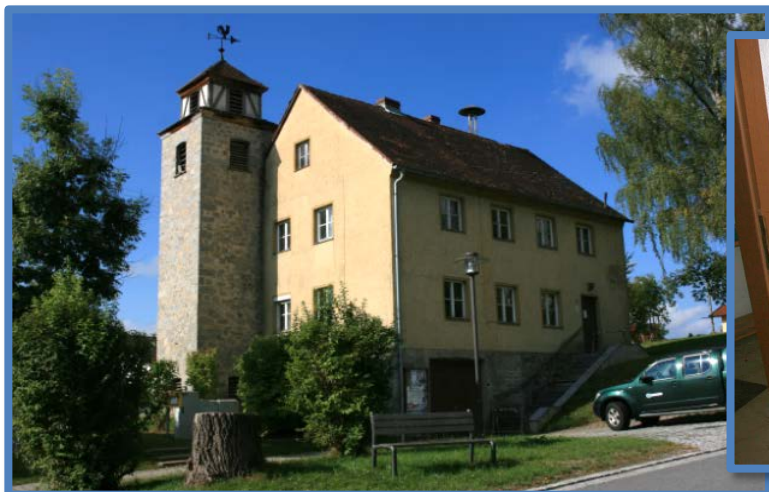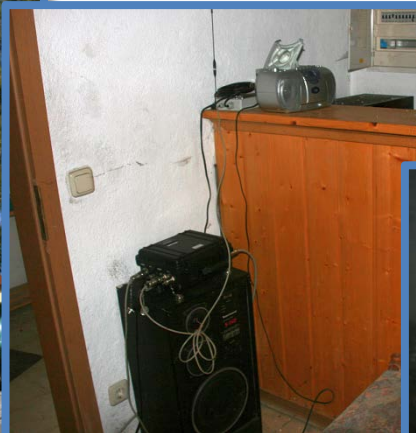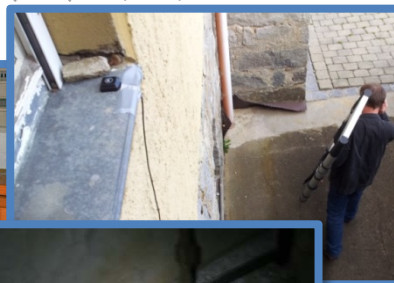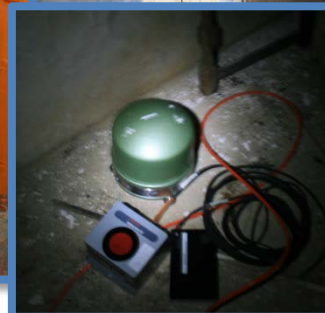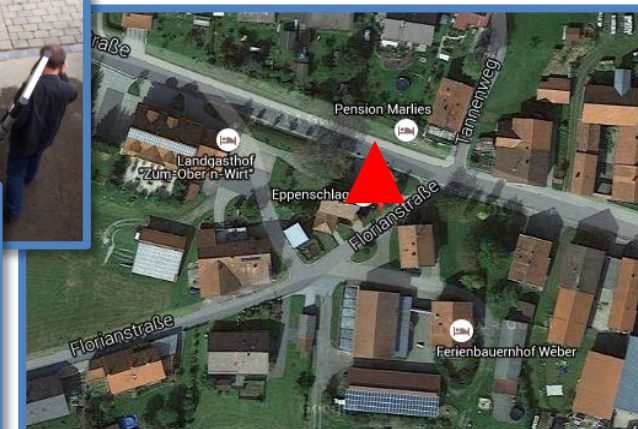

Supplement: Supplementary file 15 [file gi-2017-7-supplement.zip]
