# Supplementary material for: Data quality control and tools in passive seismic experimentsexemplified on Czech broad-band seismic pool MOBNET in theAlpArray collaborative project
Source: Copernicus journal article supplement (doi:10.5194/gi-2017-7), 2017-05-15

# A083A

## Čachotín

### INSTALLATION

Start : 16.10.2015  
 Lat : 49.6959  
 Lon : 15.6077  
 Alt : 573 m

### EQUIPMENT

Sensor : STS 2 120 s  
 Depth : 0 m  
 Recorder : Gaia 1  
 Power : electricity grid

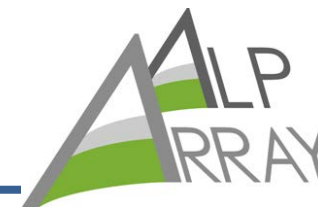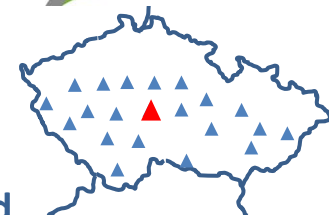

The station is located in the sacristy of the church St. Vavřince in Čachotín. Seismometer is placed behind the altar on a concrete floor covered with tiles. The GPS antenna is brought out through the window above the door, length - 5 m, direction SE, open view. Geomorphology: Sázava Uplands. Subsoil: paragneiss to migmatite.

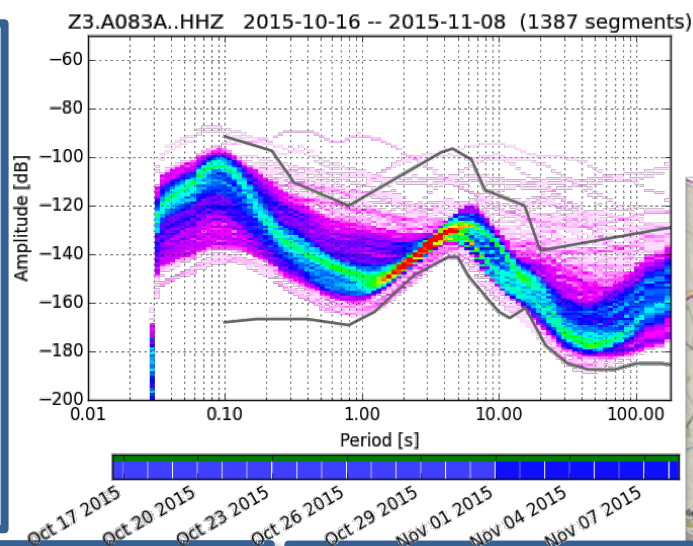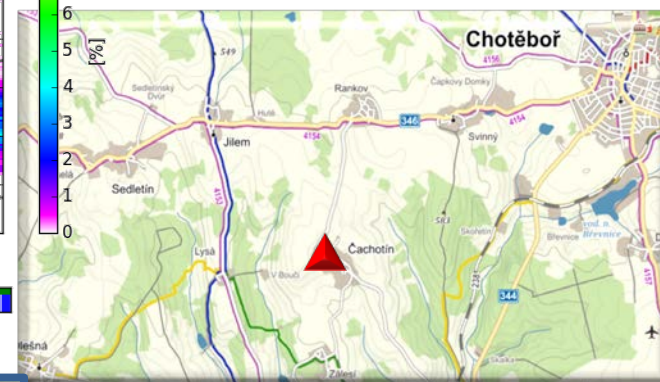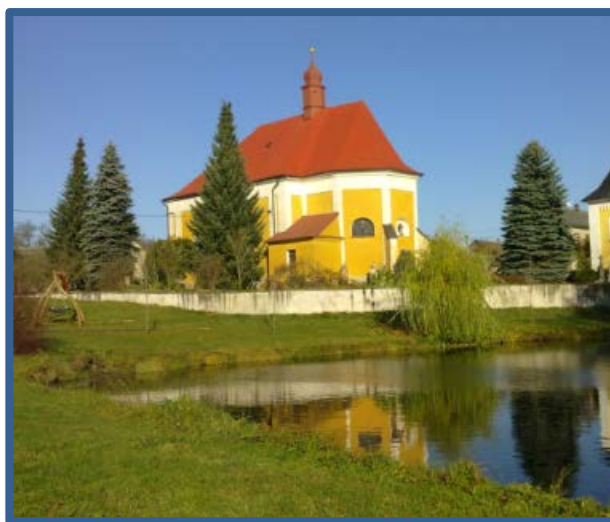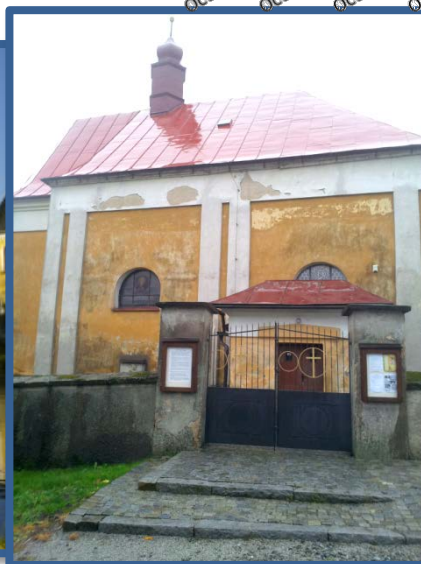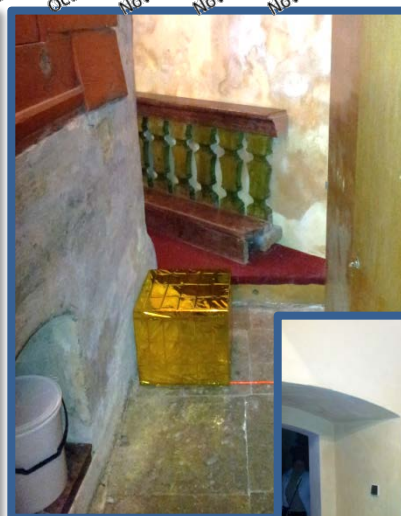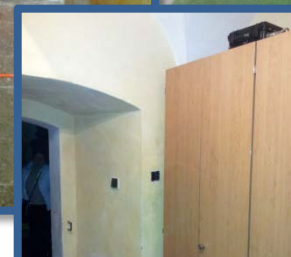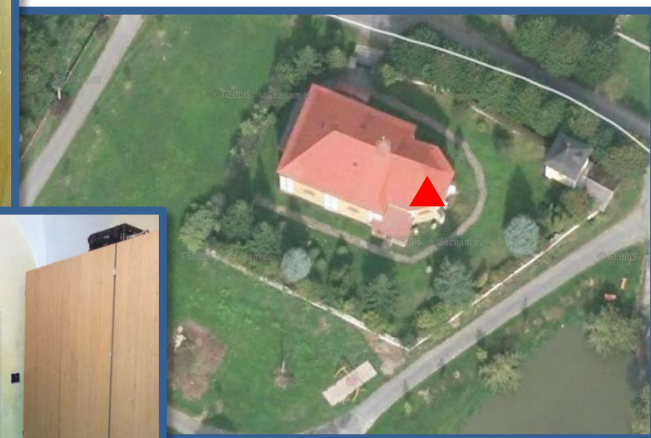

Supplement: Supplementary file 16 [file gi-2017-7-supplement.zip]
