# Supplementary material for: Data quality control and tools in passive seismic experimentsexemplified on Czech broad-band seismic pool MOBNET in theAlpArray collaborative project
Source: Copernicus journal article supplement (doi:10.5194/gi-2017-7), 2017-05-15

# A073A

## Manětín

### INSTALLATION

Start : 23.9.2015  
Lat : 49.9916  
Lon : 13.2331  
Alt : 407 m

### EQUIPMENT

Sensor : STS 2 120 s  
Depth : 3 m  
Recorder : Gaia 1  
Power : electricity

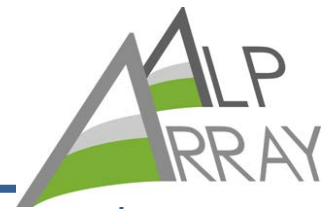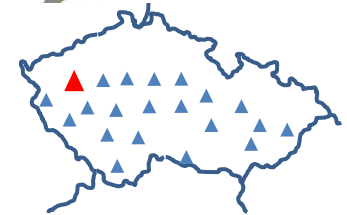

The station is located in the basement of the east wing of the chateau in Manětín. Cellar not in use, above it is the depositary. Seismometer is built in a wall niche. The GPS antenna is brought out through the vent, length - 15 m, direction - E, open view. Geomorphology: Rakovnick Uplands. Subsoil: phyllite.

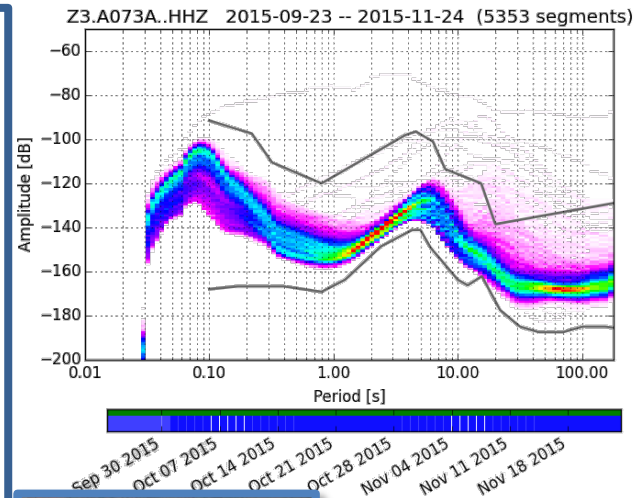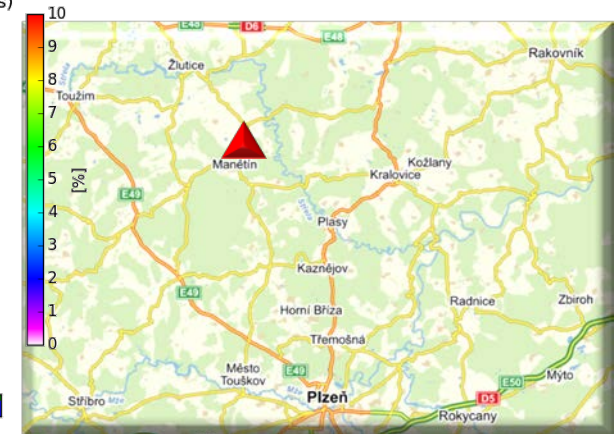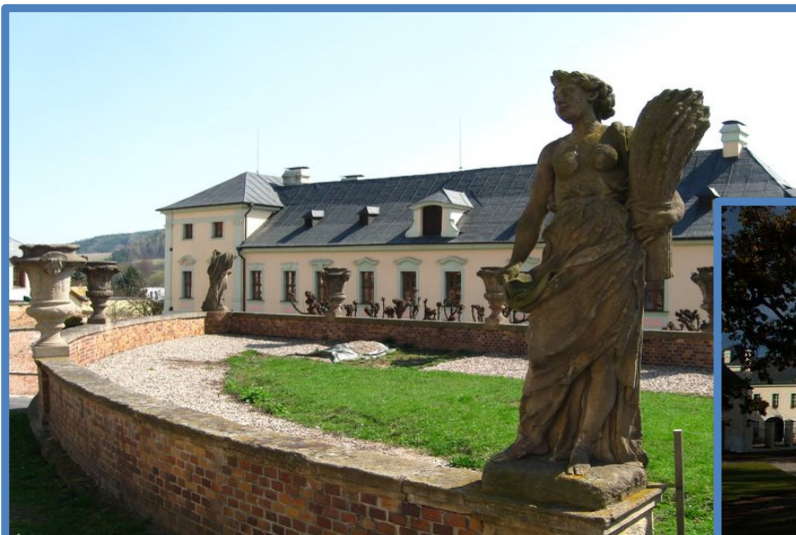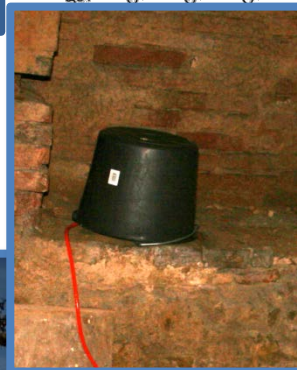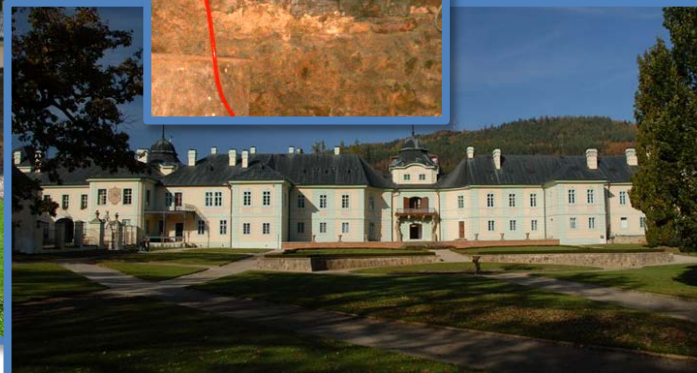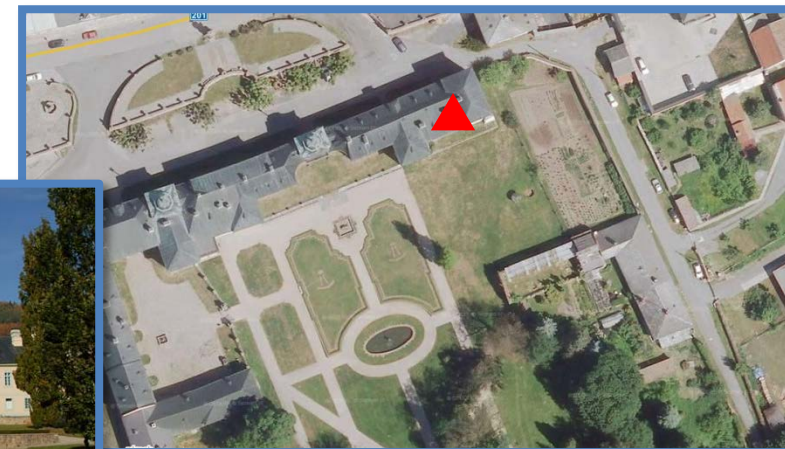

Supplement: Supplementary file 17 [file gi-2017-7-supplement.zip]
