# Supplementary material for: Data quality control and tools in passive seismic experimentsexemplified on Czech broad-band seismic pool MOBNET in theAlpArray collaborative project
Source: Copernicus journal article supplement (doi:10.5194/gi-2017-7), 2017-05-15

A074A

Kozel

## INSTALLATION

Start : 2.10.2015

Lat : 49.6715

Lon : 13.5309

Alt : 385 m

## EQUIPMENT

Sensor : STS 2 120 s

Depth : 2 m

Recorder : Gaia 1

Power : electricity

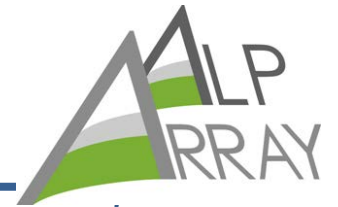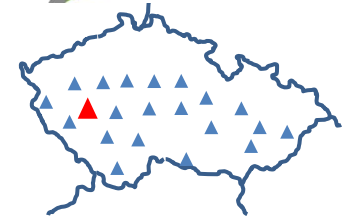

The station is located in an old refrigerator standing alone on a hillside in the park near the chateau Kozel.

Sesimometr is built on a concrete floor covered with tiles. The building is not being used.

GPS antenna is brought out the window, length - 5 m, direction NE, open view.

Geomorphology: Švihov Highlands.

Subsoil: greywacke, siltstone, slate.

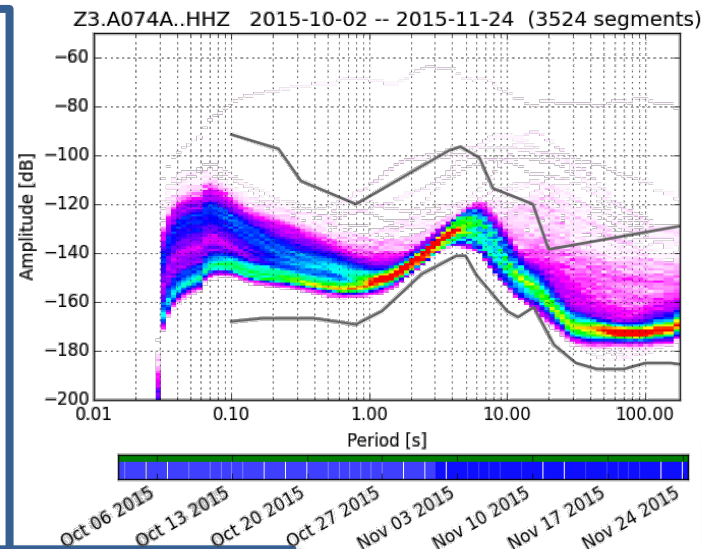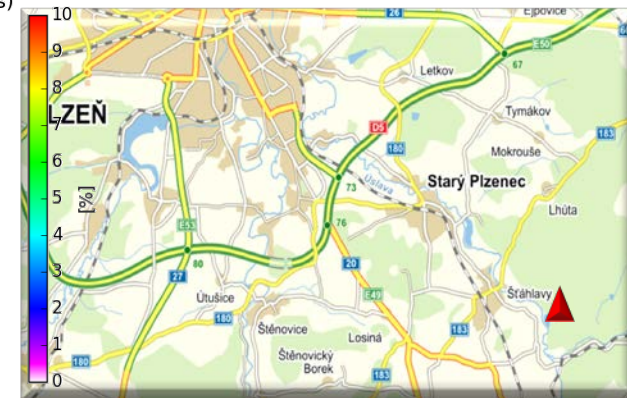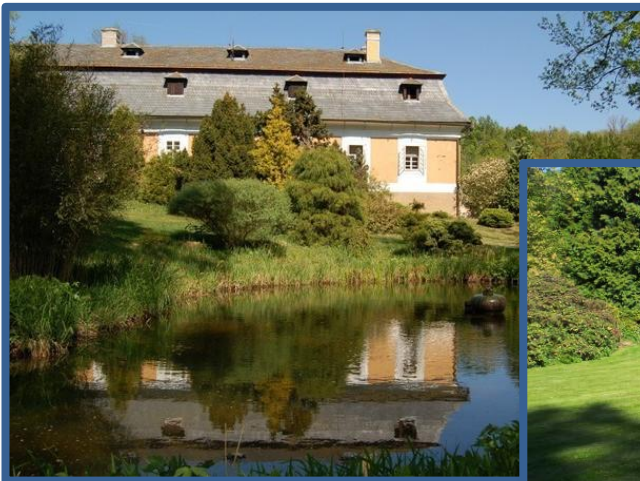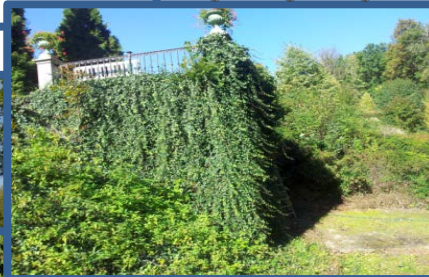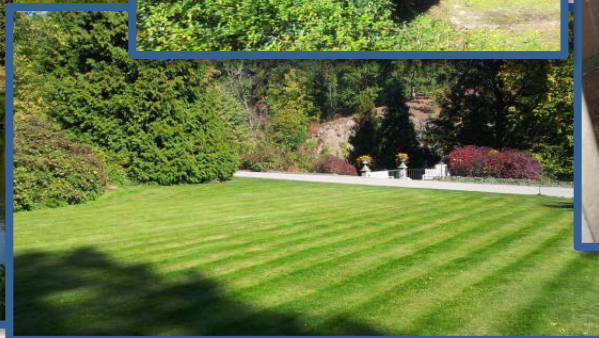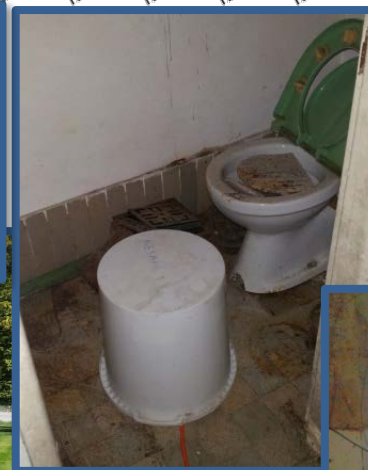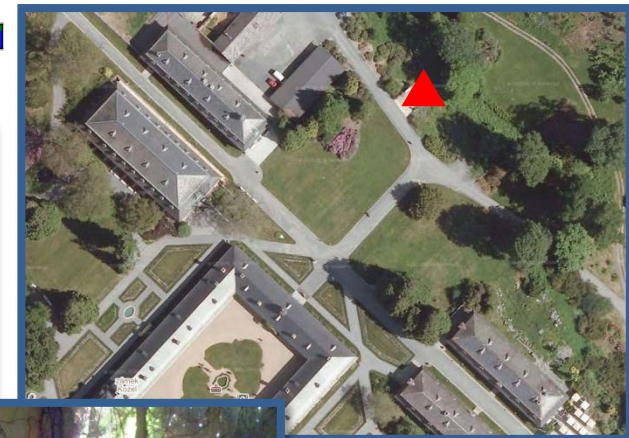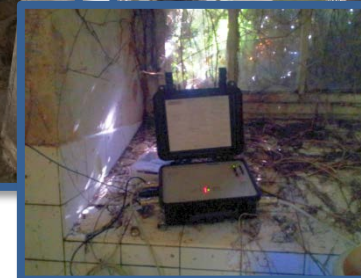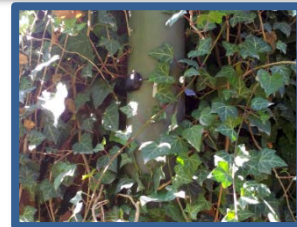

Supplement: Supplementary file 18 [file gi-2017-7-supplement.zip]
