# Supplementary material for: Data quality control and tools in passive seismic experimentsexemplified on Czech broad-band seismic pool MOBNET in theAlpArray collaborative project
Source: Copernicus journal article supplement (doi:10.5194/gi-2017-7), 2017-05-15

# A071A

## Staré Sedliště

### INSTALLATION

Start : 27.10.2015  
Lat : 49.7419  
Lon : 12.6911  
Alt : 502 m

### EQUIPMENT

Sensor : CMG-3T 120 s  
Depth : 0 m  
Recorder : Gaia 1  
Power : electricity grid

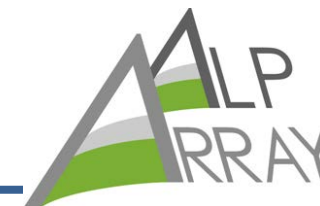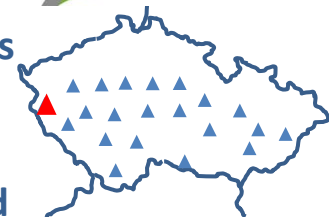

The station is located behind the sacristy under the staircase in the church of St. Prokop and Ulrich in village Staré Sedliště. Seismometer is built on the floor, which is made of stone plates. The GPS antenna is brought out through the door, length - 5 m, direction - NE, view partially obscured by trees. Geomorphology: Bohemian Forest. Subsoil: paragneiss.

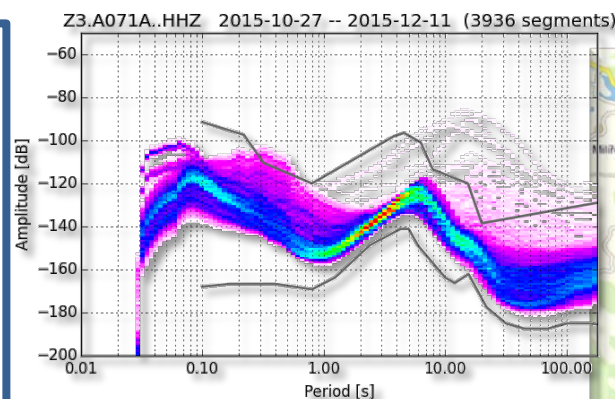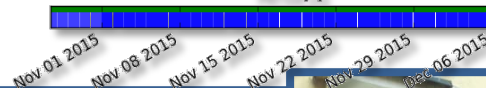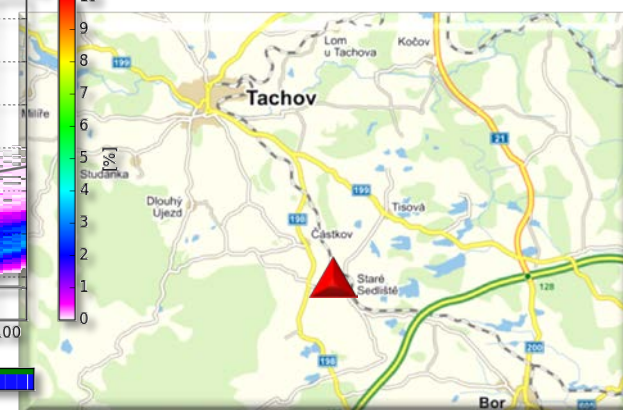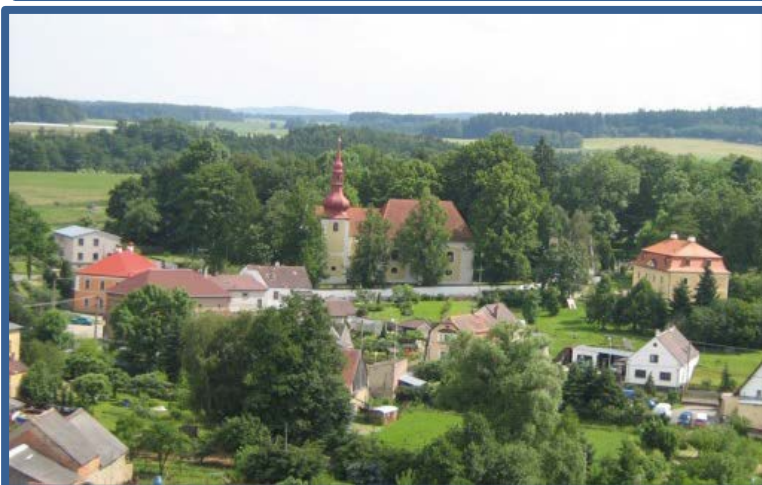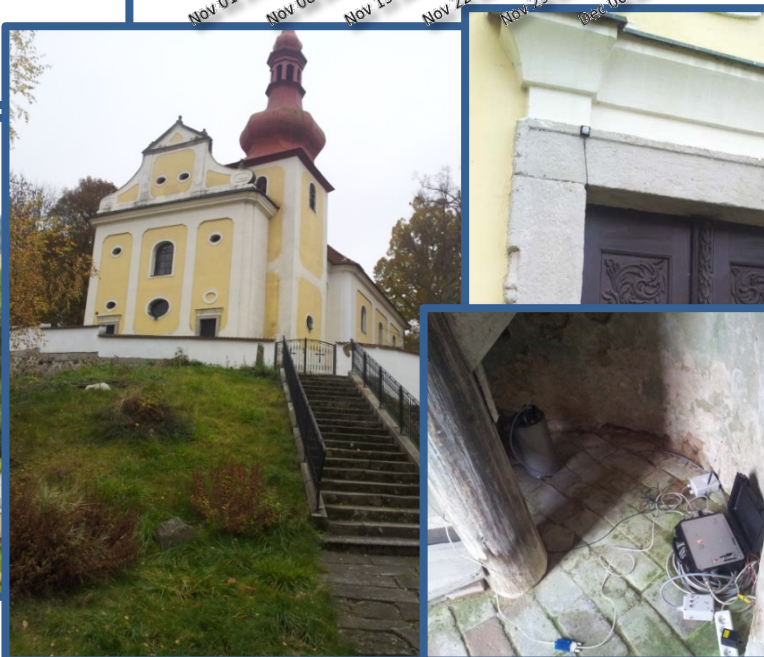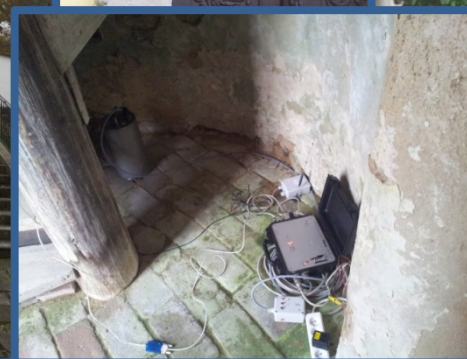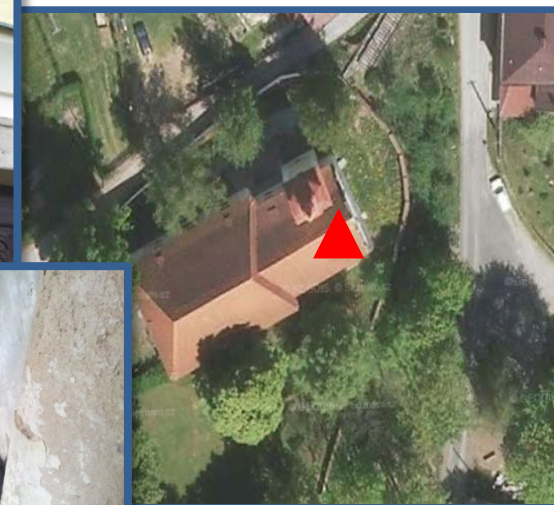

Supplement: Supplementary file 19 [file gi-2017-7-supplement.zip]
