# Supplementary material for: Data quality control and tools in passive seismic experimentsexemplified on Czech broad-band seismic pool MOBNET in theAlpArray collaborative project
Source: Copernicus journal article supplement (doi:10.5194/gi-2017-7), 2017-05-15

# AAE17

## Dobrá Voda

### INSTALLATION

Start : 17.6.2014  
Stop : 14.9.2015  
Lat : 49.1554  
Lon : 13.4379  
Alt : 890 m

### EQUIPMENT

Sensor : CMG3ESP 30 s  
Depth : 0 m  
Recorder : Gaia 1  
Power : electricity grid  
Data : miniSeed, 6 GB

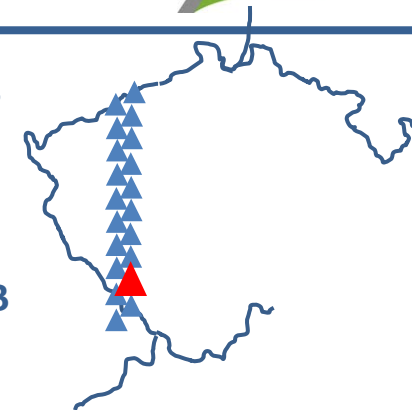

The station is located in the sacristy of the church St. Vintir in Dobra Voda.  
Seismometer is built on the brick floor.  
The GPS antenna is brought out through the window, length - 5 m, direction - E, the view partially obscured.  
Geomorphology: Bohemian Forest.  
Subsoil: paragneiss.

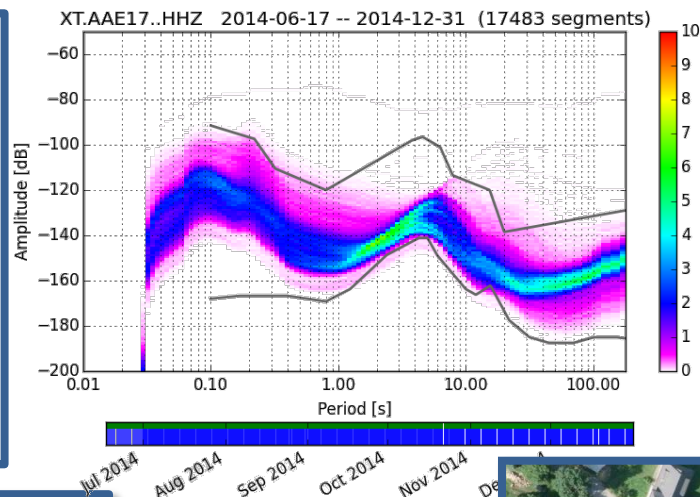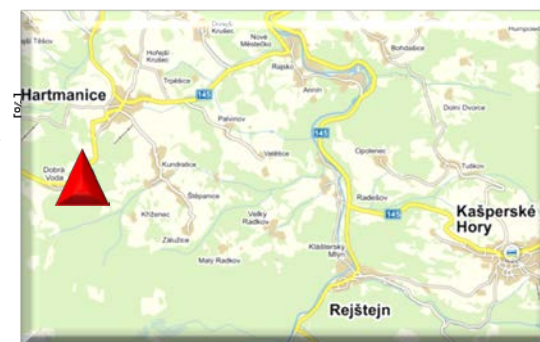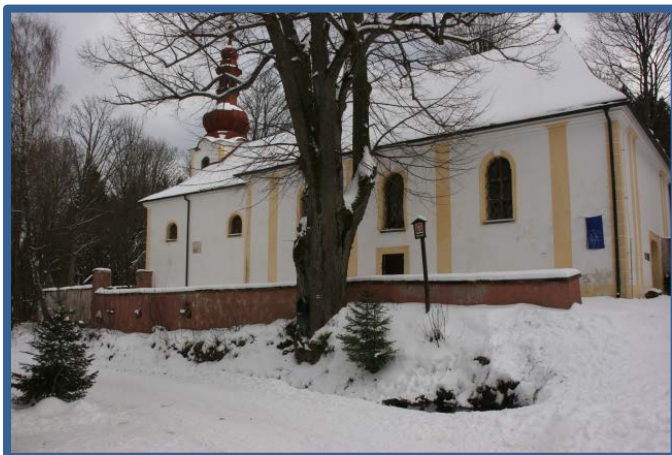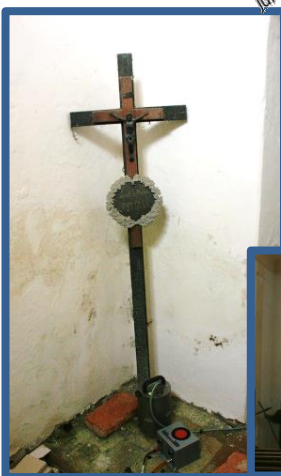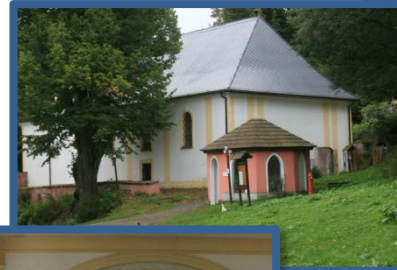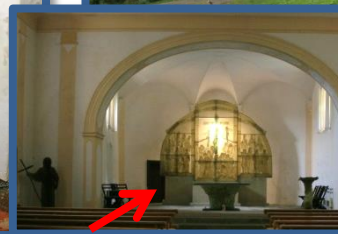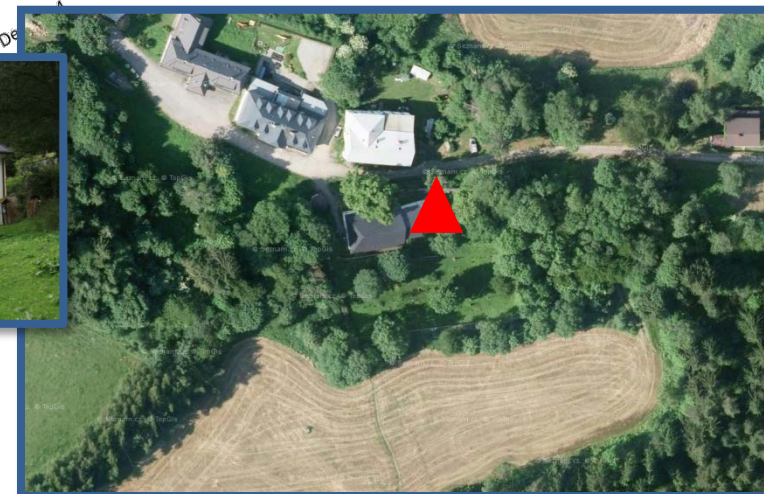

Supplement: Supplementary file 20 [file gi-2017-7-supplement.zip]
