# Supplementary material for: Data quality control and tools in passive seismic experimentsexemplified on Czech broad-band seismic pool MOBNET in theAlpArray collaborative project
Source: Copernicus journal article supplement (doi:10.5194/gi-2017-7), 2017-05-15

# AAE11

## Starý Plzenec

### INSTALLATION

Start : 20.6.2014  
Stop : 2.10.2015  
Lat : 49.7030  
Lon : 13.4692  
Alt : 345 m

### EQUIPMENT

Sensor : STS 2 120 s  
Depth : 0 m  
Recorder : Gaia 1  
Power : electricity grid  
Data : miniSeed, 6 GB

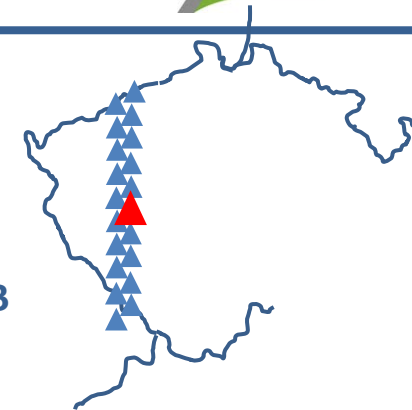

The station is located under the stairs, which lead into the tower of the Church of the Nativity of the Virgin Mary in Starý Plzenec. Seismometer is built on the stone floor. The GPS antenna is brought out through the window, length - 5 m, direction - S, the view is free.

Geomorphology: Švihov Highlands.  
Subsoil: gravel sediment.

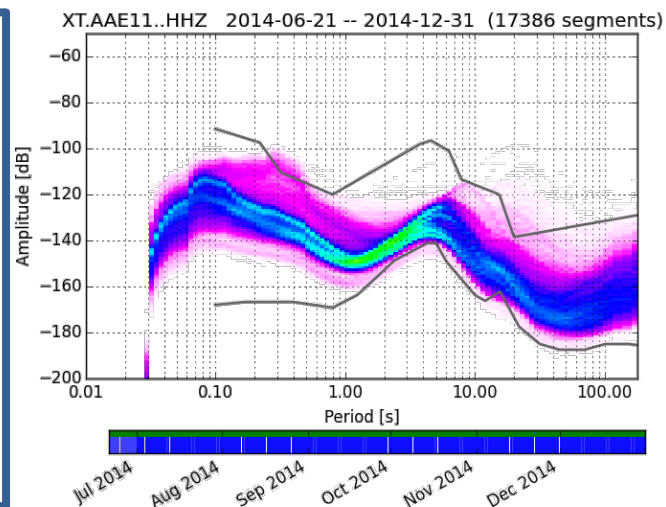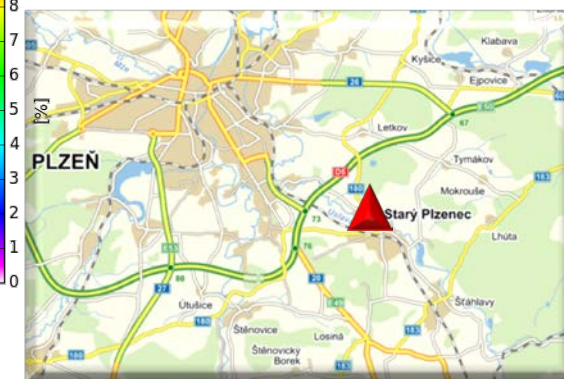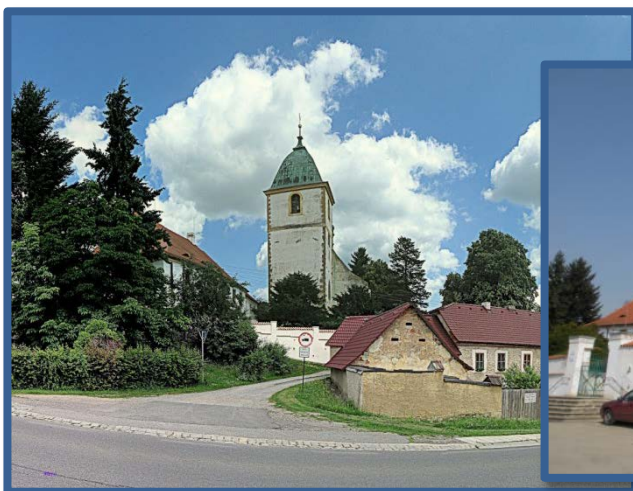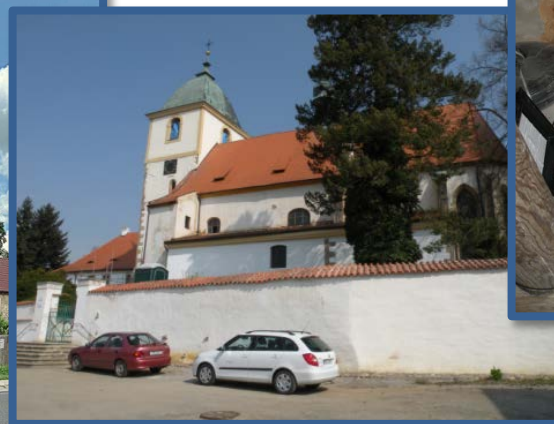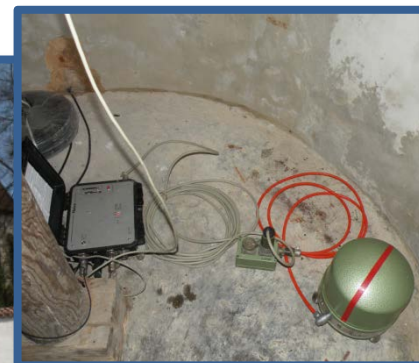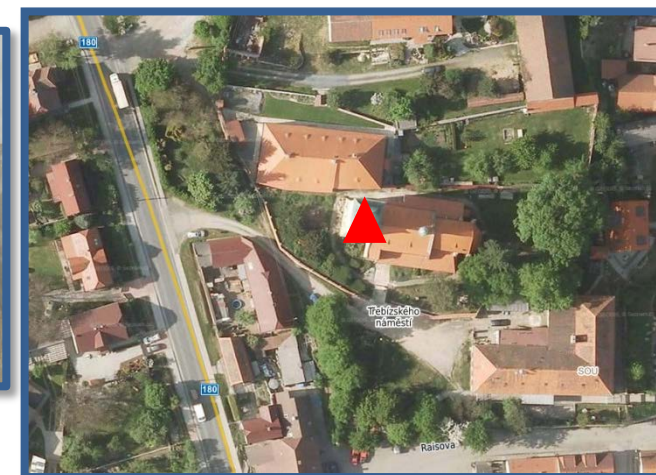

Supplement: Supplementary file 21 [file gi-2017-7-supplement.zip]
