# Supplementary material for: Data quality control and tools in passive seismic experimentsexemplified on Czech broad-band seismic pool MOBNET in theAlpArray collaborative project
Source: Copernicus journal article supplement (doi:10.5194/gi-2017-7), 2017-05-15

# A085A

## Strážek

### INSTALLATION

Start : 7.10.2015  
Lat : 49.4392  
Lon : 16.1962  
Alt : 458 m

### EQUIPMENT

Sensor : STS 2 120 s  
Depth : 0 m  
Recorder : Gaia 1  
Power : electricity grid

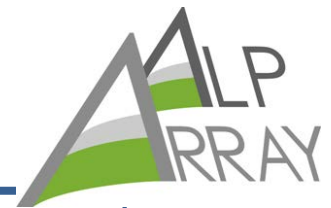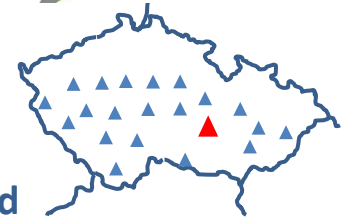

The station is located in the sacristy of the church St. Simon and Jude in the village Strážek.

Seismometer is placed on a concrete floor covered with tiles.

The GPS antenna is brought out through the window, length - 5 m, direction SE, open view.

Geomorphology: Křižanov Highlands.

Subsoil: paragneiss to migmatite.

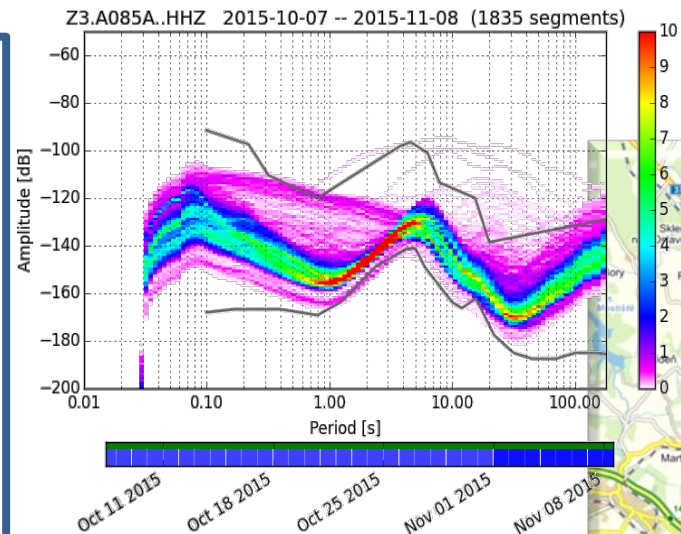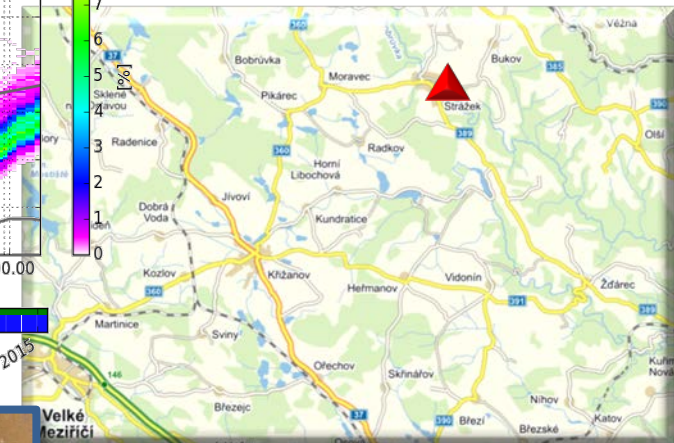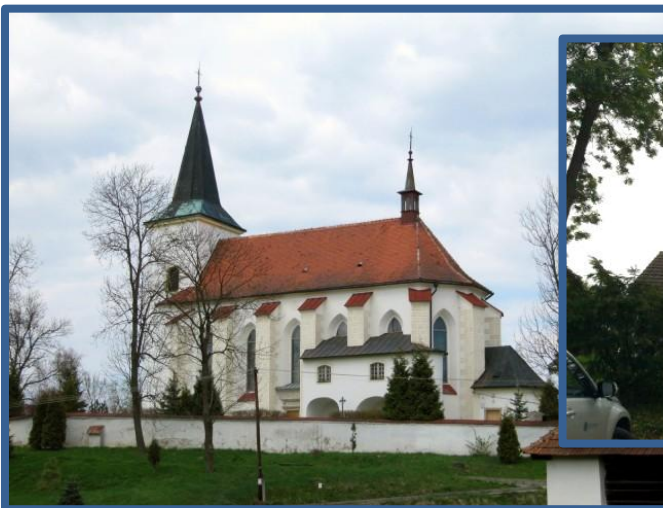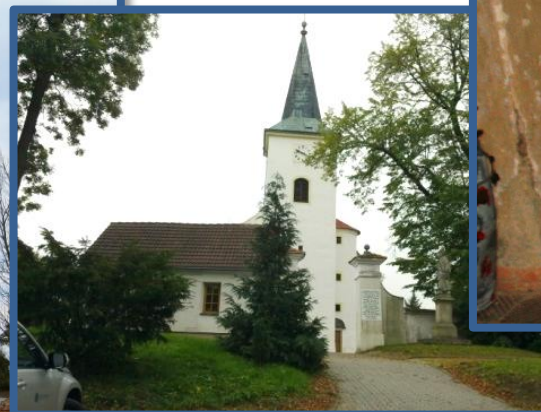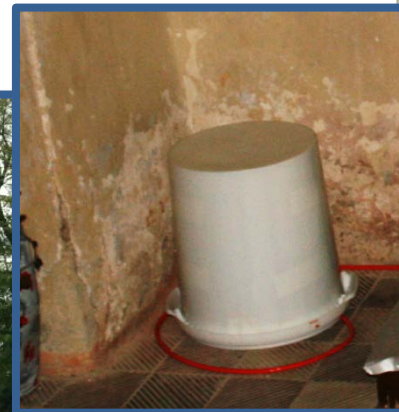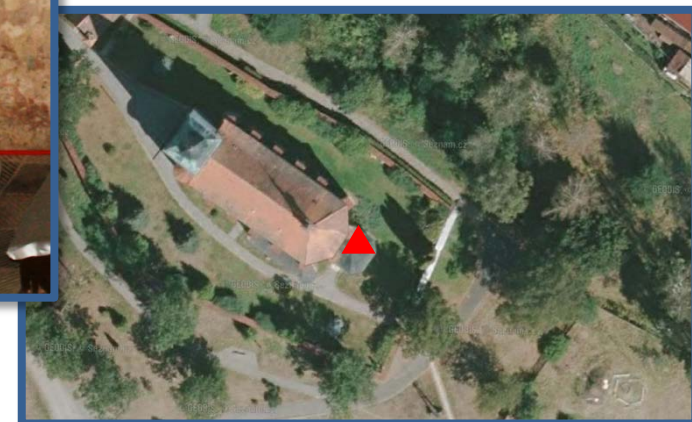

Supplement: Supplementary file 22 [file gi-2017-7-supplement.zip]
