# Supplementary material for: Data quality control and tools in passive seismic experimentsexemplified on Czech broad-band seismic pool MOBNET in theAlpArray collaborative project
Source: Copernicus journal article supplement (doi:10.5194/gi-2017-7), 2017-05-15

# AAE13

## Lázně Letiny

### INSTALLATION

Start : 20.6.2014  
Stop : 2.10.2015  
Lat : 49.5289  
Lon : 13.4547  
Alt : 361 m

### EQUIPMENT

Sensor : STS 2 120 s  
Depth : 0 m  
Recorder : Gaia 1  
Power : electricity grid  
Data : miniSeed, 6 GB

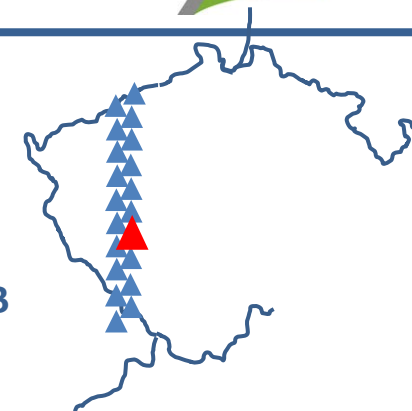

The station is located in the storeroom by the Letiny chateau.  
Seismometer is built on a concrete floor covered with tiles.  
The GPS antenna is brought out through the window, length - 5 m, direction - NE, free views.  
Geomorphology: Švihov Highlands.  
Subsoil: sandy loam sediment.

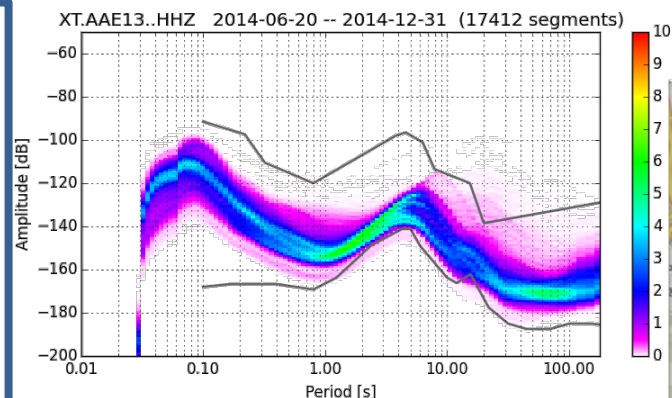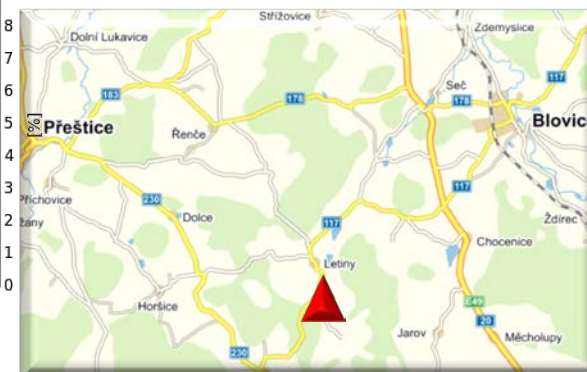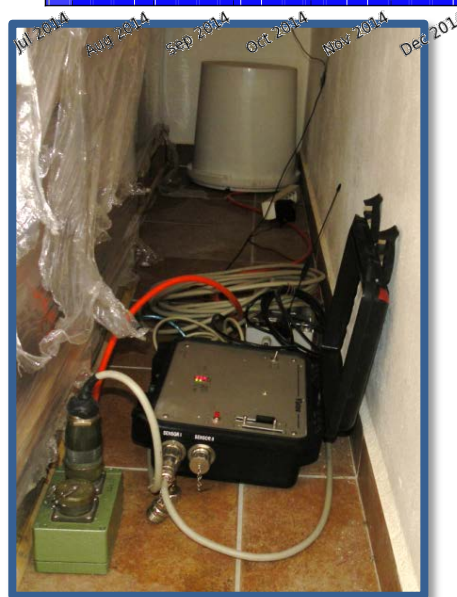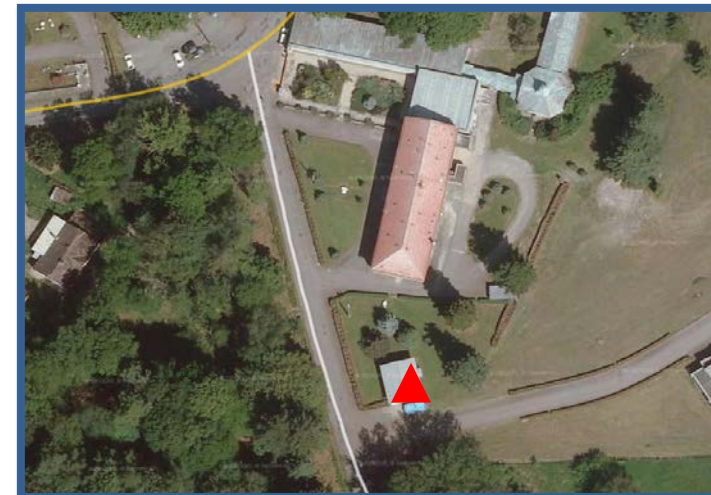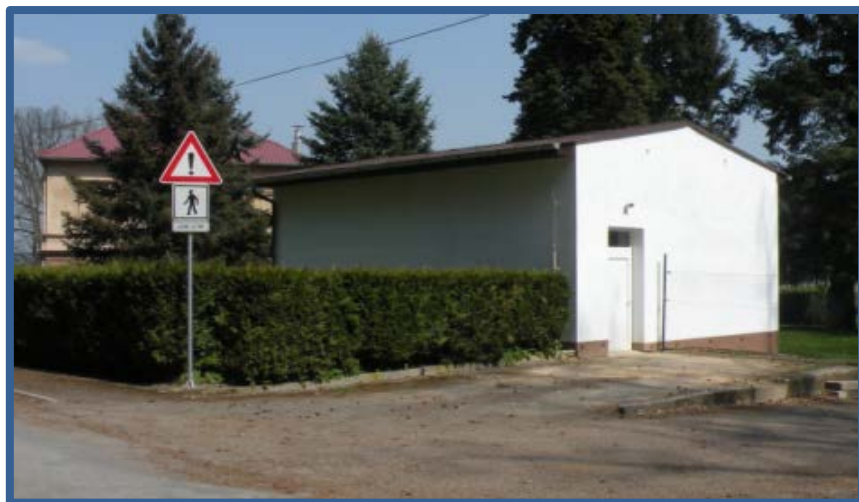

Supplement: Supplementary file 23 [file gi-2017-7-supplement.zip]
