# Supplementary material for: Data quality control and tools in passive seismic experimentsexemplified on Czech broad-band seismic pool MOBNET in theAlpArray collaborative project
Source: Copernicus journal article supplement (doi:10.5194/gi-2017-7), 2017-05-15

**AAE14**

**Dolany**

## INSTALLATION

Start : 4.7.2014  
Stop : 12.9.2015  
Lat : 49.4427  
Lon : 13.2495  
Alt : 386 m

## EQUIPMENT

Sensor : STS 2 120 s  
Depth : 3 m  
Recorder : Gaia 1  
Power : electricity grid  
Data : miniSeed, 6 GB

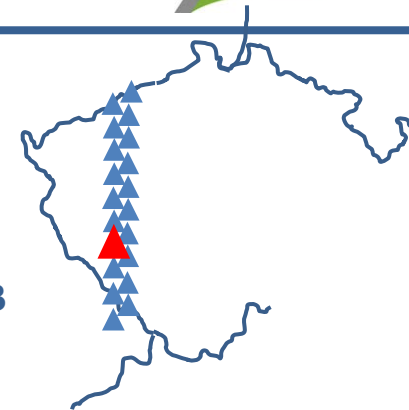

The station is located in the sacristy of the Church of St. Peter and Paul in Dolany. Seismometer is built on a concrete floor covered with tiles. The GPS antenna is brought out through the window, length - 5 m, direction - E, the view is free. Geomorphology: Švihov Highlands. Subsoil: sandy loam sediment.

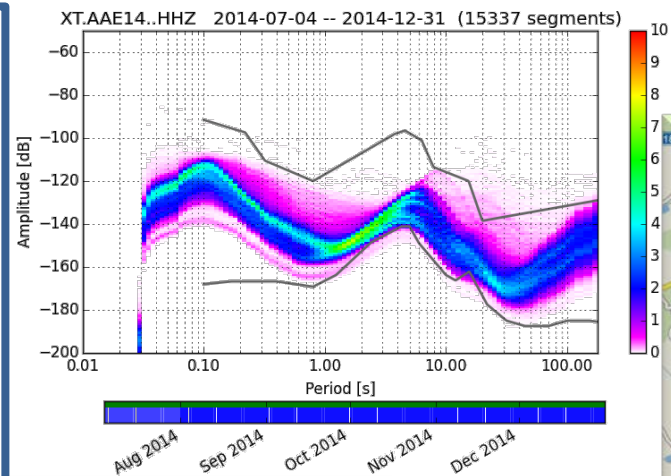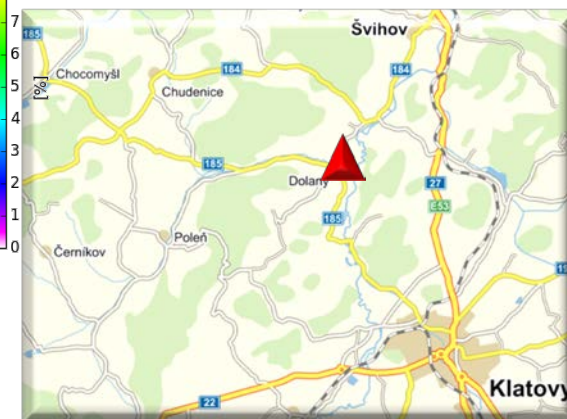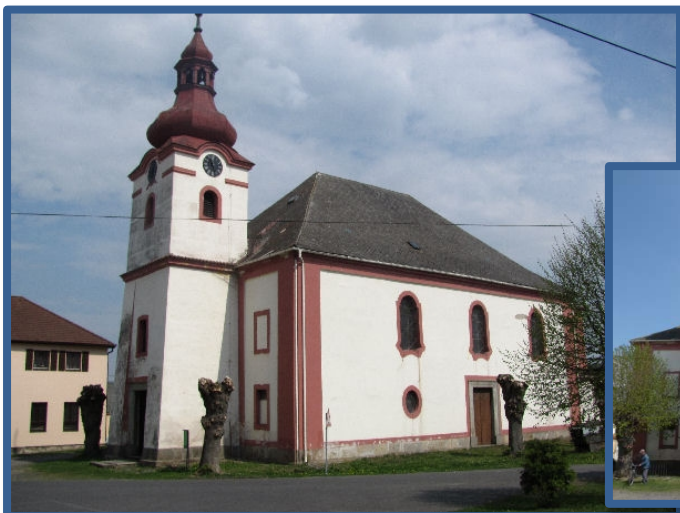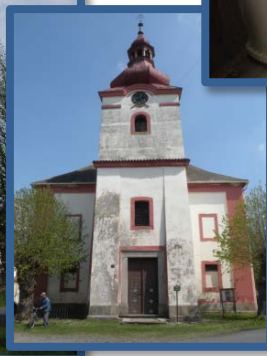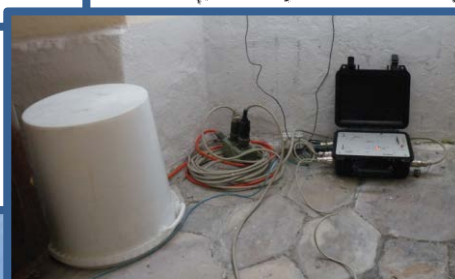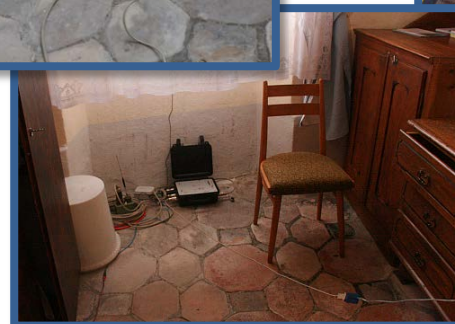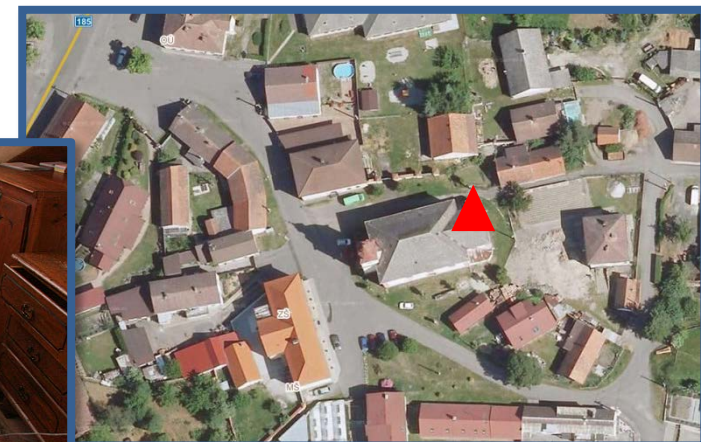

Supplement: Supplementary file 24 [file gi-2017-7-supplement.zip]
