# Supplementary material for: Data quality control and tools in passive seismic experimentsexemplified on Czech broad-band seismic pool MOBNET in theAlpArray collaborative project
Source: Copernicus journal article supplement (doi:10.5194/gi-2017-7), 2017-05-15

# AAE19 Březník

## INSTALLATION

Start : 18.6.2014  
Stop : 1.9.2015  
Lat : 48.9712  
Lon : 13.4826  
Alt : 1173 m

## EQUIPMENT

Sensor : CMG3ESP 30 s  
Depth : 1.5 m  
Recorder : Gaia 1  
Power : akumulator 120Ah  
Data : miniSeed, 6 GB

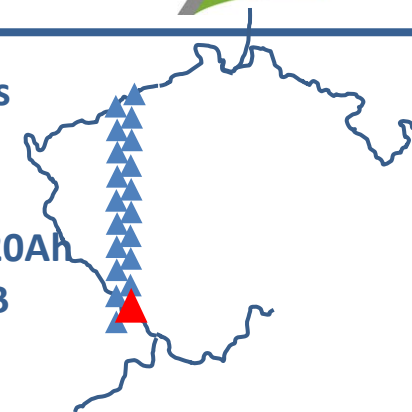

The station is located in the basement of a building information center at Březník. Seismometer is built on a floor covered with tiles.

The GPS antenna is brought out through the window, length - 5 m, direction - S, unobstructed views.

Geomorphology: Bohemian Forest.  
Subsoil: migmatite.

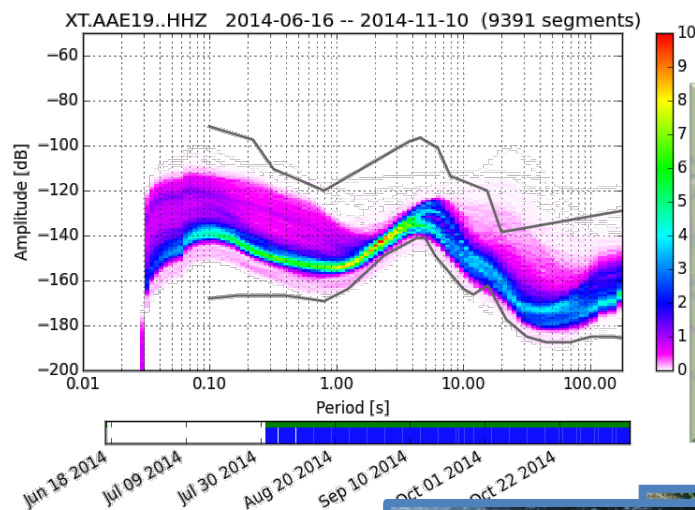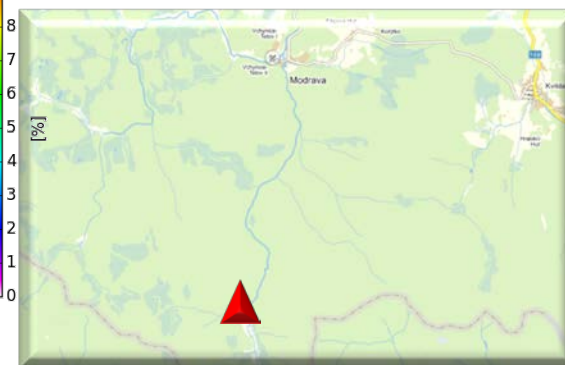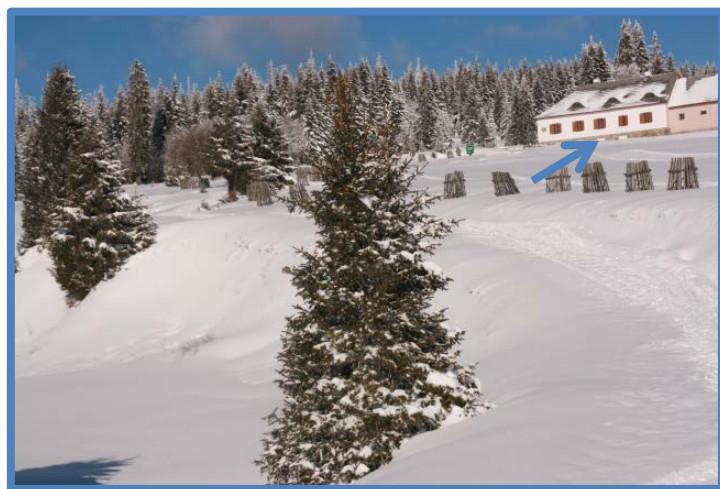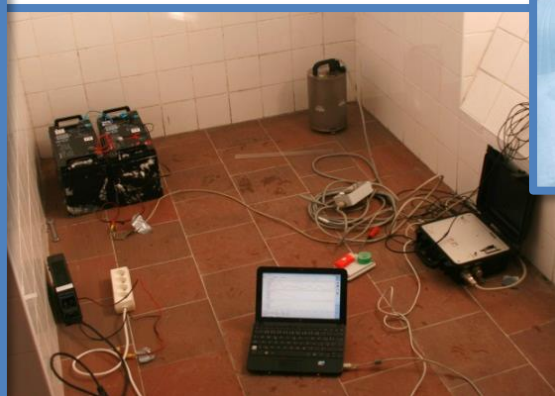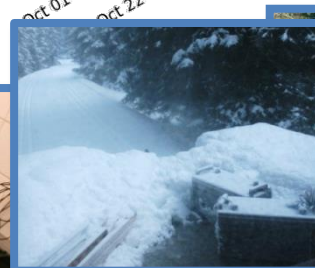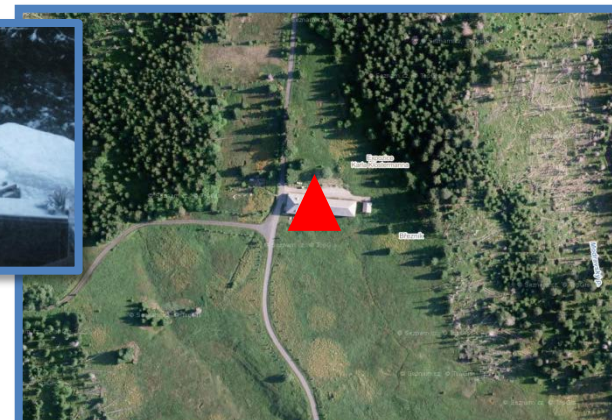

Supplement: Supplementary file 25 [file gi-2017-7-supplement.zip]
