# Supplementary material for: Data quality control and tools in passive seismic experimentsexemplified on Czech broad-band seismic pool MOBNET in theAlpArray collaborative project
Source: Copernicus journal article supplement (doi:10.5194/gi-2017-7), 2017-05-15

**AAE01**

**Hora Sv. Kateřiny**

## INSTALLATION

Start : 23.7.2014  
Stop : in operation  
Lat : 50.6072  
Lon : 13.4317  
Alt : 590 m

## EQUIPMENT

Sensor : STS 2 120 s  
Depth : 15 m  
Recorder : Q 330 S  
Power : electricity grid  
Data : miniSeed, 6 GB

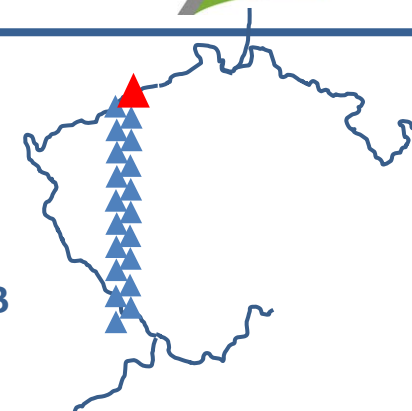

The station is located in an old adit below the village Hora Sv. Kateřiny.

Seismometer standing on a concrete pillar, which is built on a rock.

The GPS antenna is located at the pole in front of adit, length - 20 m, omnidirectional view.

Geomorphology: Ore Mountains.

Subsoil: orthogneiss.

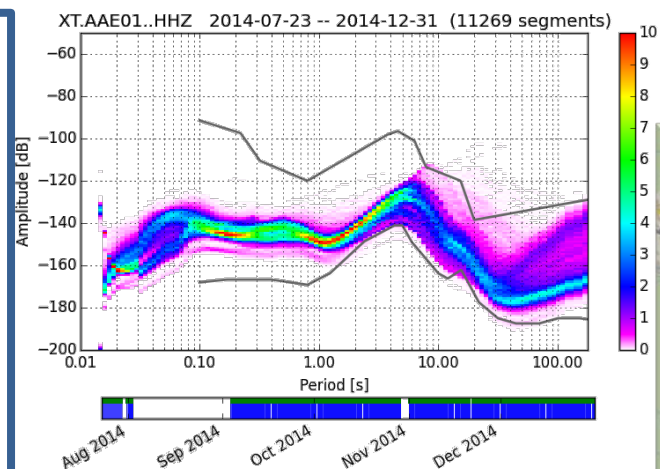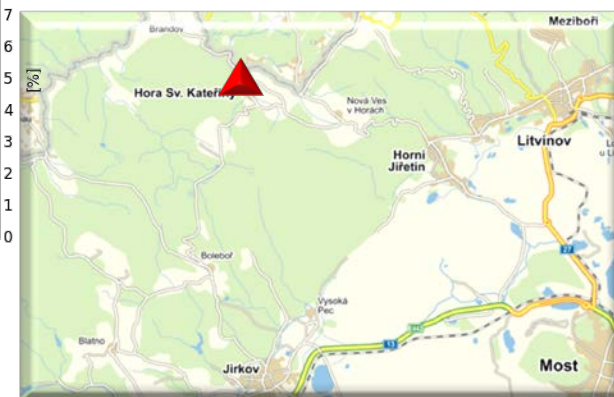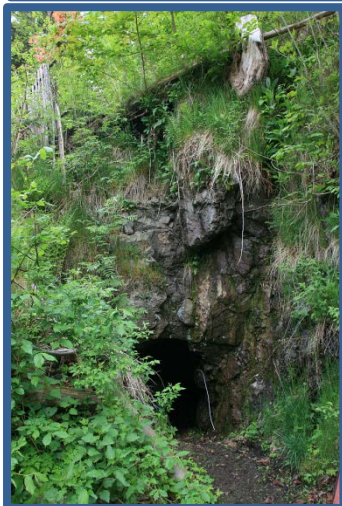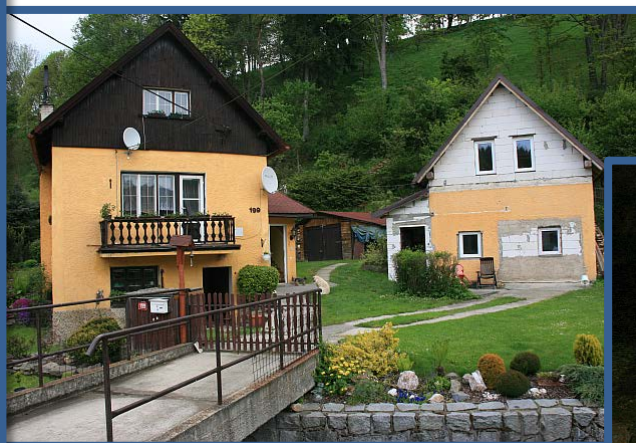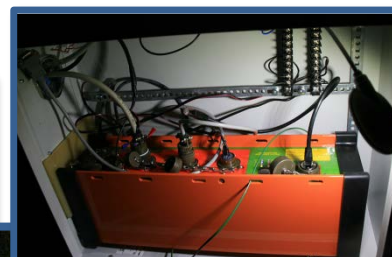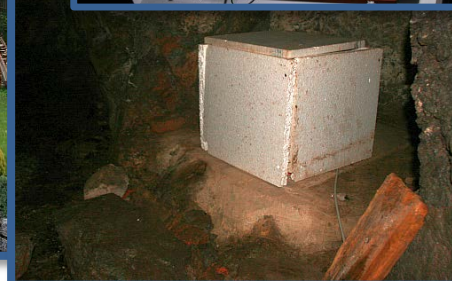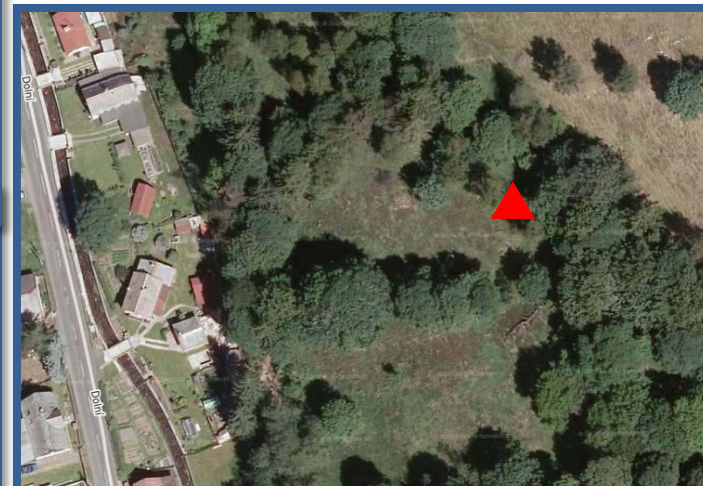

Supplement: Supplementary file 26 [file gi-2017-7-supplement.zip]
