# Supplementary material for: Data quality control and tools in passive seismic experimentsexemplified on Czech broad-band seismic pool MOBNET in theAlpArray collaborative project
Source: Copernicus journal article supplement (doi:10.5194/gi-2017-7), 2017-05-15

AAE09

Obora

## INSTALLATION

Start : 4.7.2014  
Stop : 2.10. 2015  
Lat : 49.8890  
Lon : 13.4135  
Alt : 493 m

## EQUIPMENT

Sensor : STS 2 120 s  
Depth : 0 m  
Recorder : Gaia 1  
Power : electricity grid  
Data : miniSeed, 6 GB

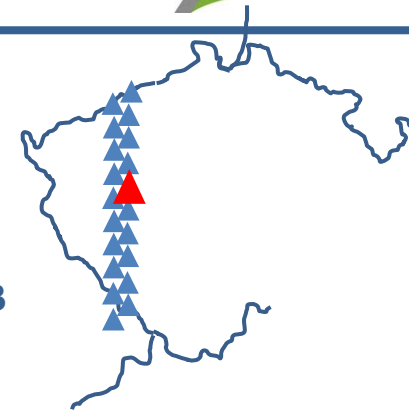

The station is located in the sacristy of the church St. Michael the Archangel in the village Obora.

Seismometer is built on a concrete floor covered with tiles.

The GPS antenna is brought out over the front door, lenght - 5 m, direction - SE, view partially obscured by trees.

Geomorphology: Plazy Uplands.

Subsoil: sericite phyllite.

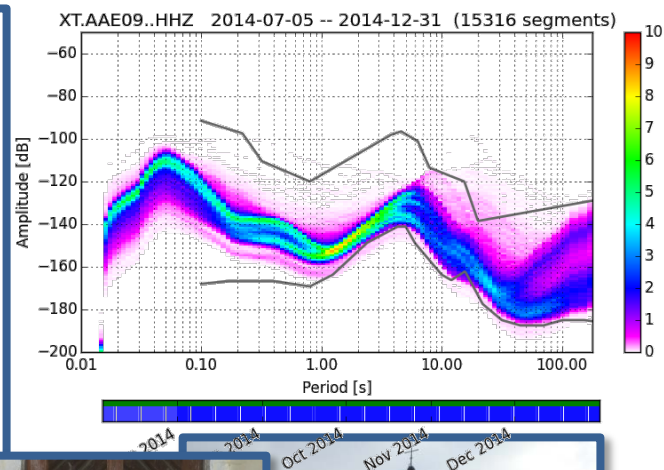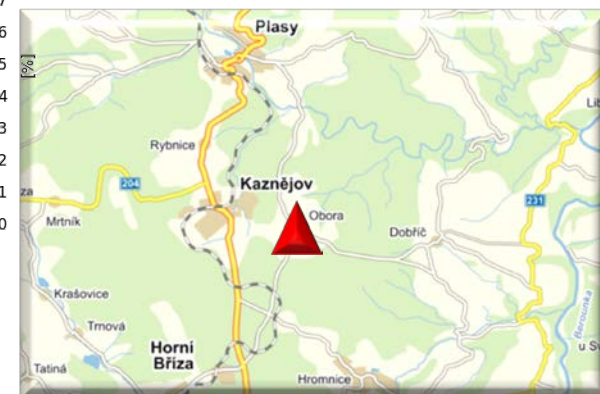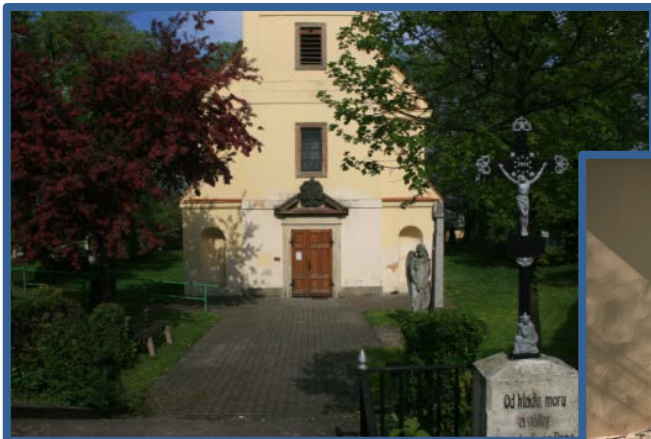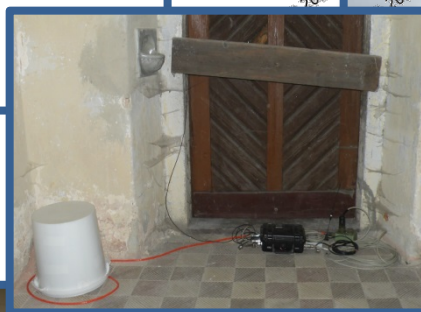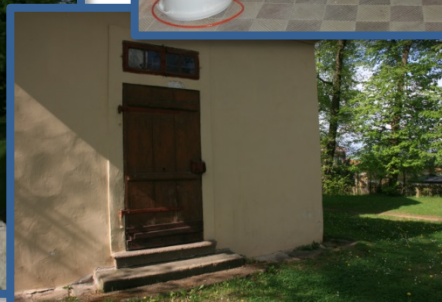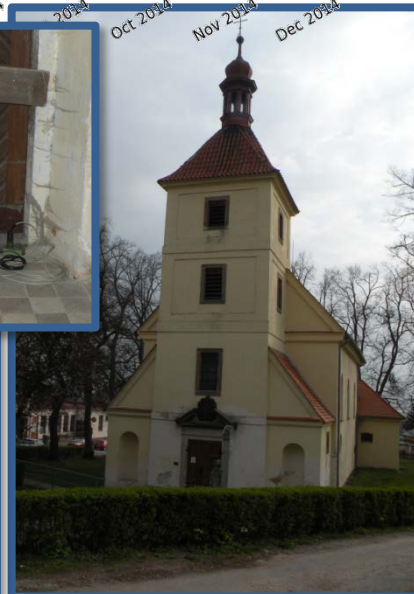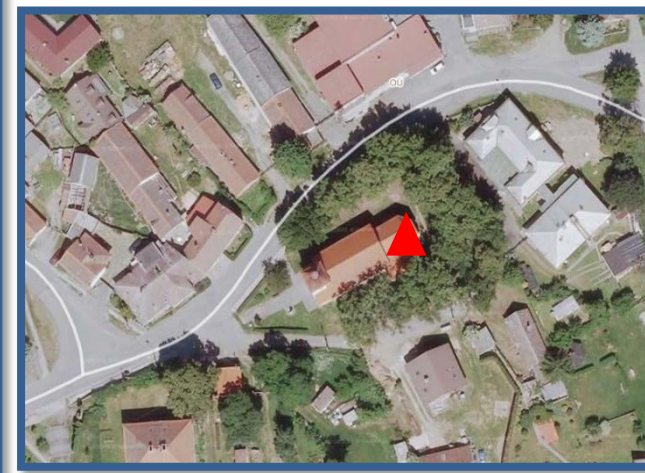

Supplement: Supplementary file 28 [file gi-2017-7-supplement.zip]
