# Supplementary material for: Data quality control and tools in passive seismic experimentsexemplified on Czech broad-band seismic pool MOBNET in theAlpArray collaborative project
Source: Copernicus journal article supplement (doi:10.5194/gi-2017-7), 2017-05-15

# A082A Živanice

## INSTALLATION

Start : 8.10.2015  
Lat : 50,0609  
Lon : 15,6502  
Alt : 220 m

## EQUIPMENT

Sensor : STS 2 120 s  
Depth : 0 m  
Recorder : Gaia 1  
Power : electricity grid

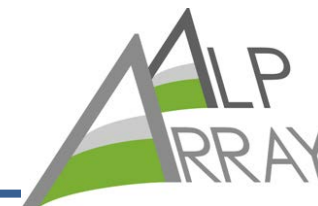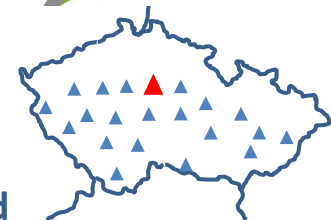

The station is located in the sacristy of the Church of Annunciation of the Lord in Živanice.

Seismometer is situated on the concrete floor.

The GPS antenna is brought out through the window, length - 5 m, direction E, open view.

Geomorphology: Elbe Lowland.

Subsoil: windblown sand.

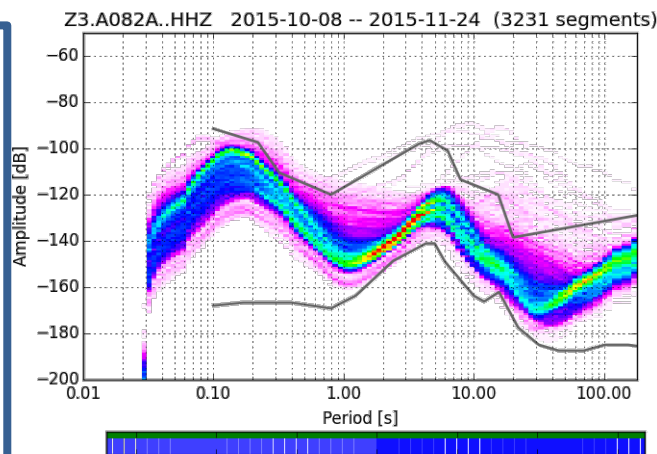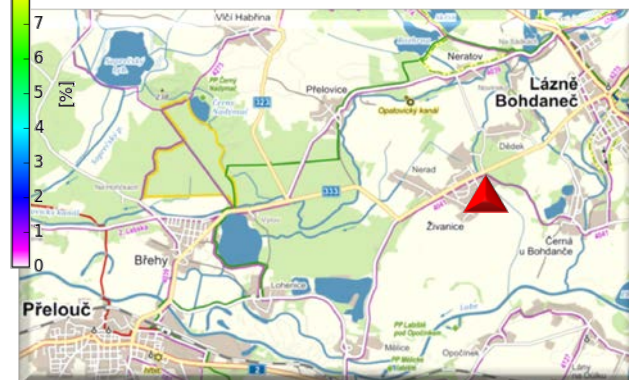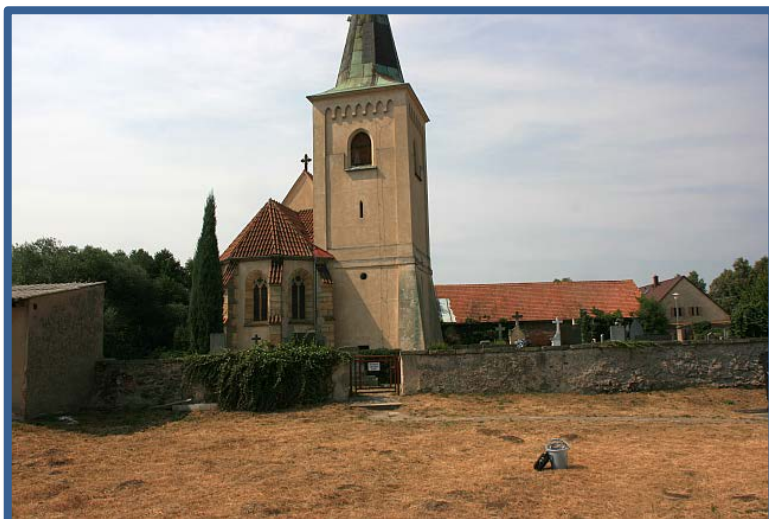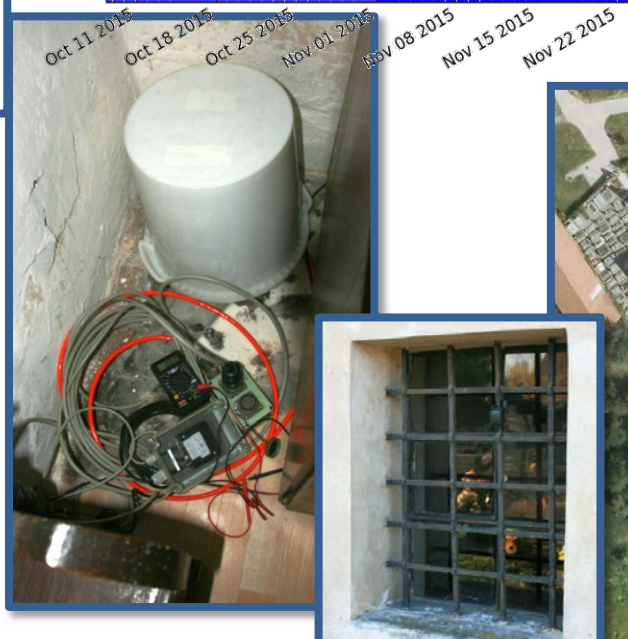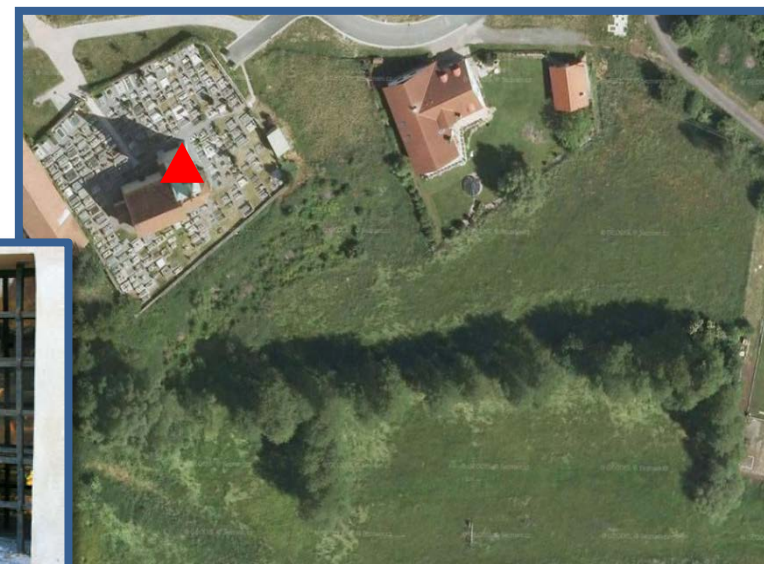

Supplement: Supplementary file 29 [file gi-2017-7-supplement.zip]
