# Supplementary material for: Data quality control and tools in passive seismic experimentsexemplified on Czech broad-band seismic pool MOBNET in theAlpArray collaborative project
Source: Copernicus journal article supplement (doi:10.5194/gi-2017-7), 2017-05-15

# A077A

## Kestřany

### INSTALLATION

Start : 3.11.2015  
 Lat : 49.2705  
 Lon : 14.0739  
 Alt : 370 m

### EQUIPMENT

Sensor : CMG-3ESP 30 s  
 Depth : 5 m  
 Recorder : Gaia 1  
 Power : electricity grid

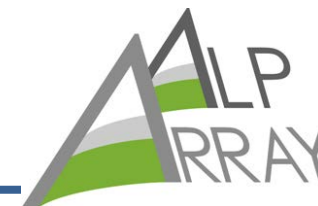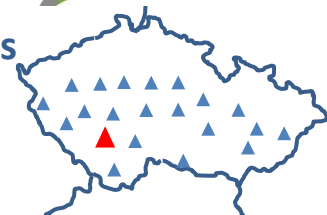

The station is located in the cellar of the Upper fortress in Kestřany. The fortress is open to the public. The cellar is unused and accessible only by a ladder. Seismometer is built on the protrusion wall.

The GPS antenna is brought out through the window, length - 5 m, direction SE, open view.

Geomorphology: České Budějovice Basin.  
 Subsoil: granite- sediment mixed transition.

Z3.A077A..HHZ 2015-11-03 -- 2015-12-01 (1298 segments)

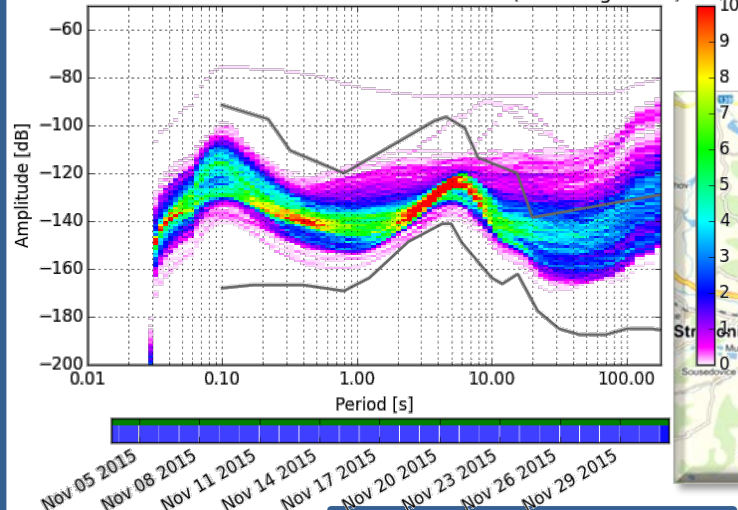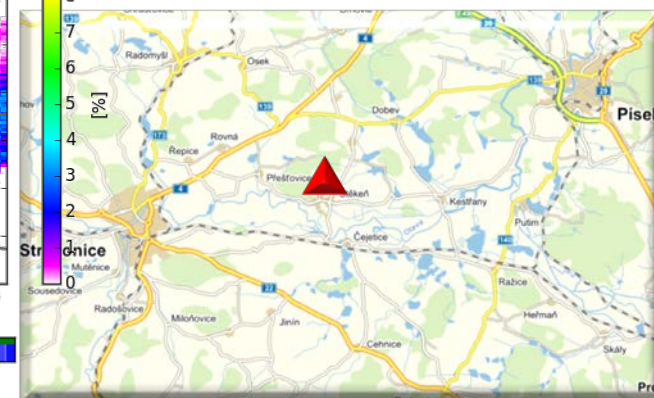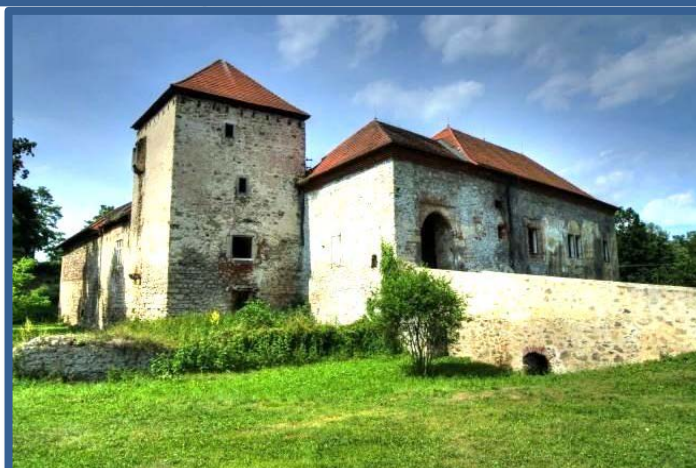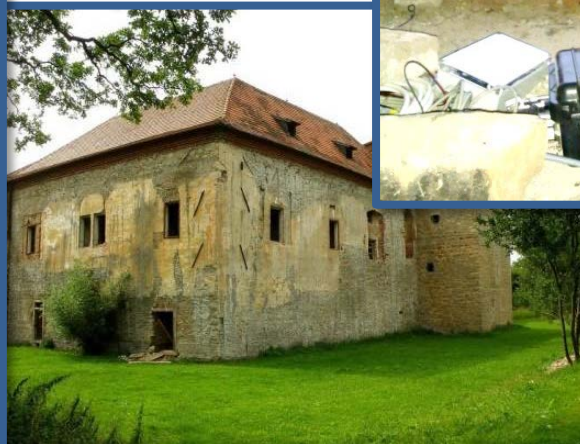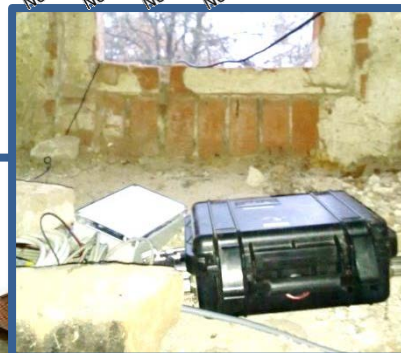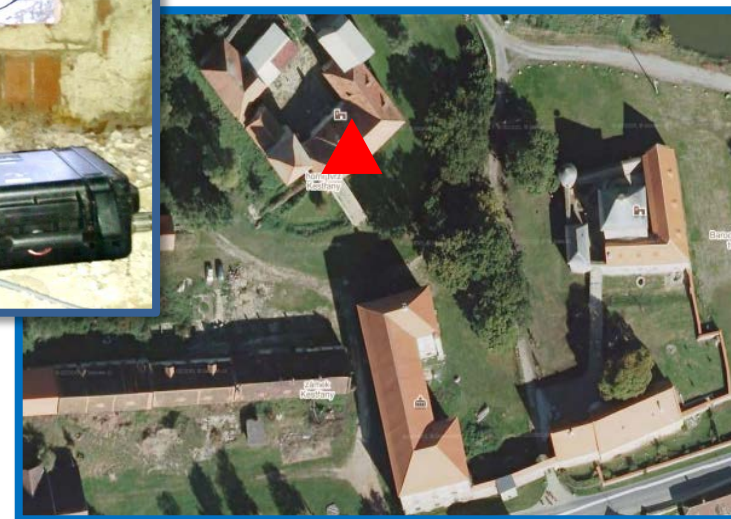

Supplement: Supplementary file 30 [file gi-2017-7-supplement.zip]
