# Supplementary material for: Data quality control and tools in passive seismic experimentsexemplified on Czech broad-band seismic pool MOBNET in theAlpArray collaborative project
Source: Copernicus journal article supplement (doi:10.5194/gi-2017-7), 2017-05-15

A084A

Bítov

## INSTALLATION

Start : 22.9.2015

Lat : 48.9434

Lon : 15.7007

Alt : 403 m

## EQUIPMENT

Sensor : STS 2 120 s

Depth : 0 m

Recorder : Gaia 1

Power : electricity grid

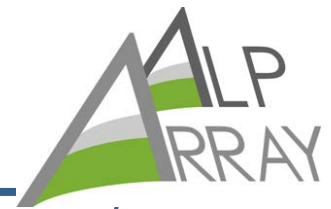

The station is located on the ground floor of the second gate of the castle Bitov. Seismometer is placed on an outcrop of rock on a concrete floor covered with tiles. The GPS antenna is brought out through the window and fastened to iron bars, length - 5 m, direction S, limited view from the east.

Geomorphology: Jevišov Uplands.  
Subsoil: amfibolite.

Z3.A084A..HHZ 2015-09-22 -- 2015-12-03 (6230 segments)

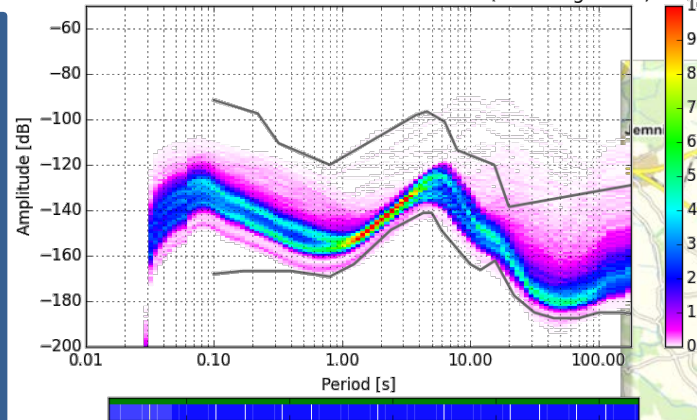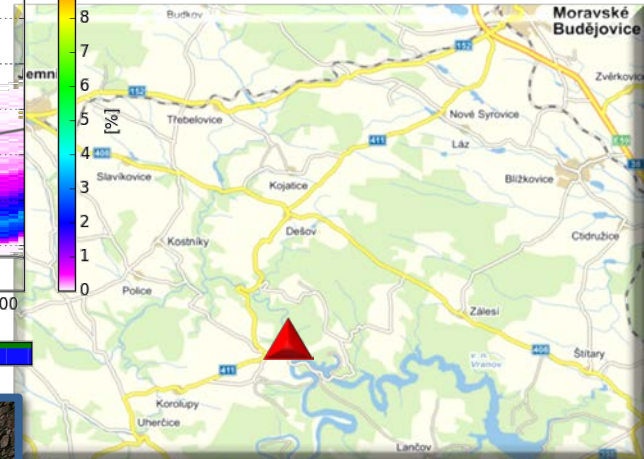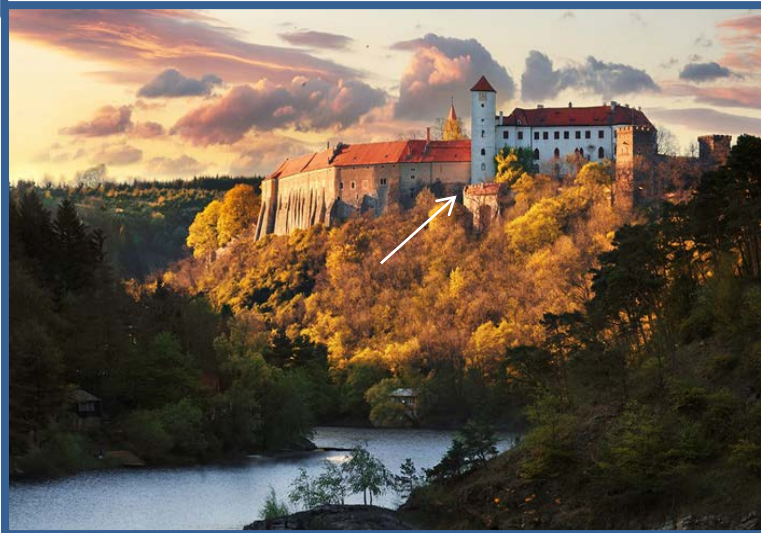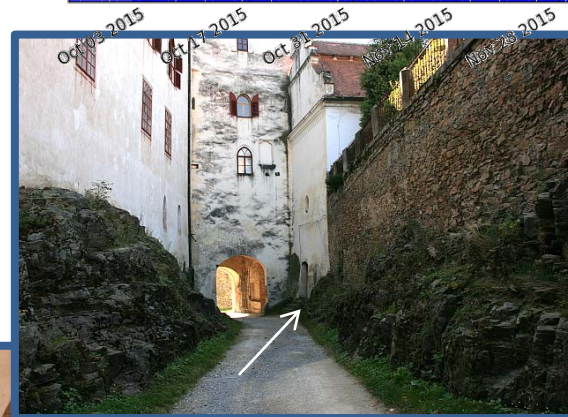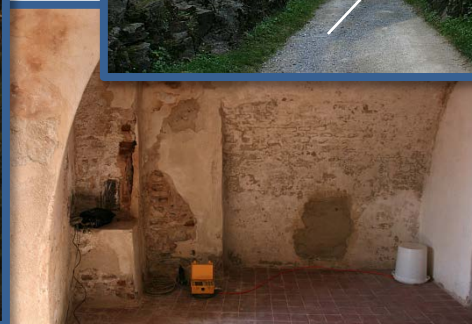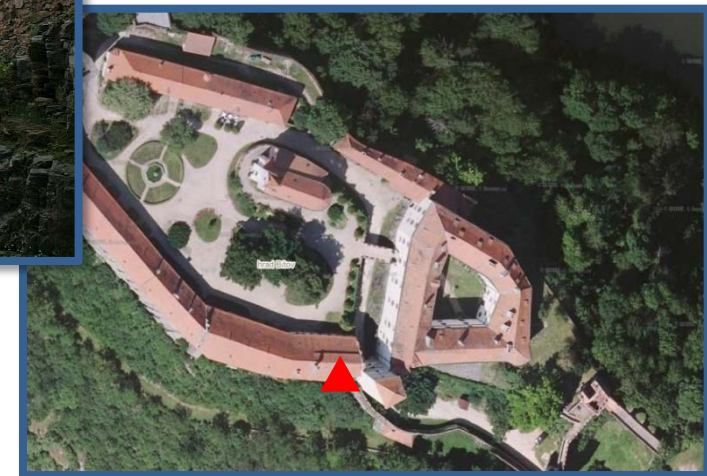

Supplement: Supplementary file 31 [file gi-2017-7-supplement.zip]
