# Supplementary material for: Data quality control and tools in passive seismic experimentsexemplified on Czech broad-band seismic pool MOBNET in theAlpArray collaborative project
Source: Copernicus journal article supplement (doi:10.5194/gi-2017-7), 2017-05-15

**AAE06**

**Valeč**

## INSTALLATION

Start : 1.7.2014  
Stop : 25.8.2015  
Lat : 50.1746  
Lon : 13.2519  
Alt : 545 m

## EQUIPMENT

Sensor : CMG 3T 120 s  
Depth : 2 m  
Recorder : Gaia 1  
Power : electricity grid  
Data : miniSeed, 6 GB

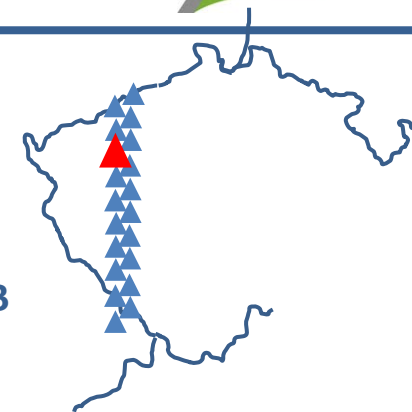

The station is located in the cellar below the Valeč chateau.

Seismometer is built in a wall niche.

The GPS antenna is brought out through the vent, lenght - 5 m, direction - S, the view is free.

Geomorphology: Doupov Mountains.

Subsoil: pyroclastic rock.

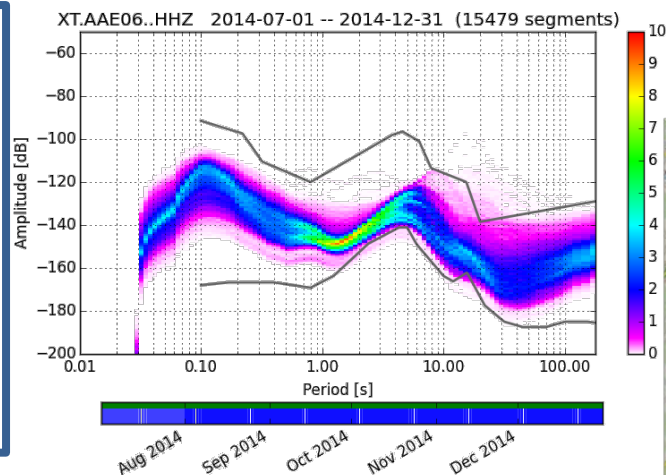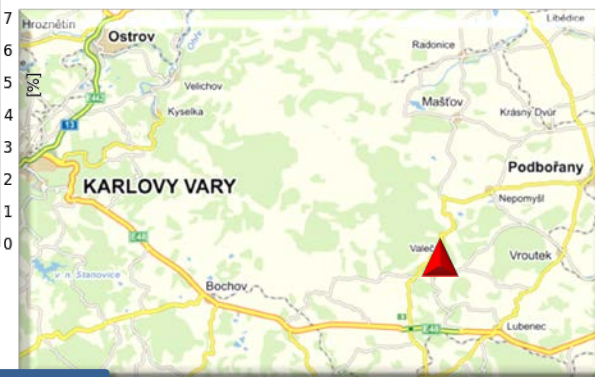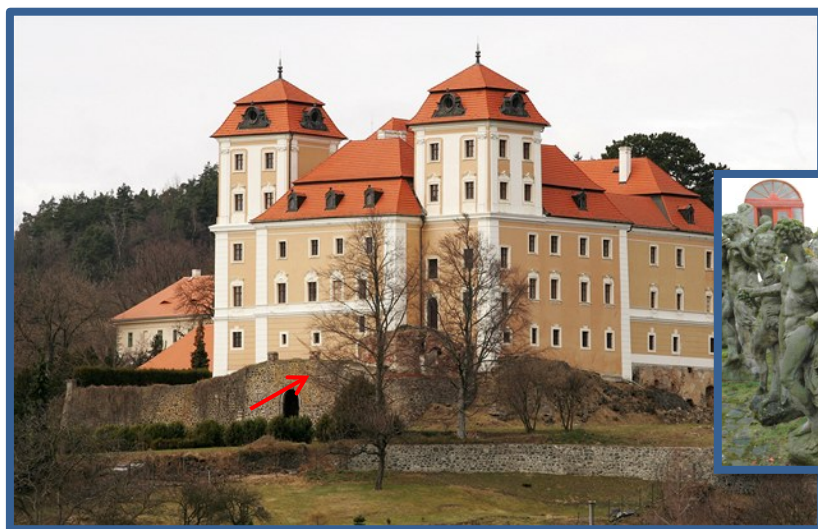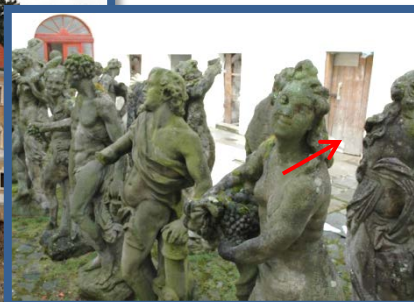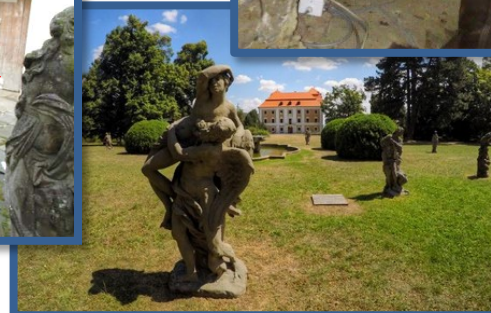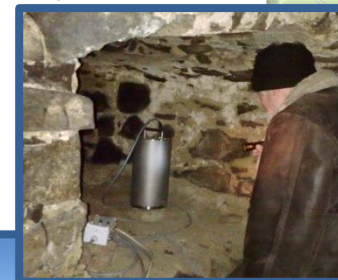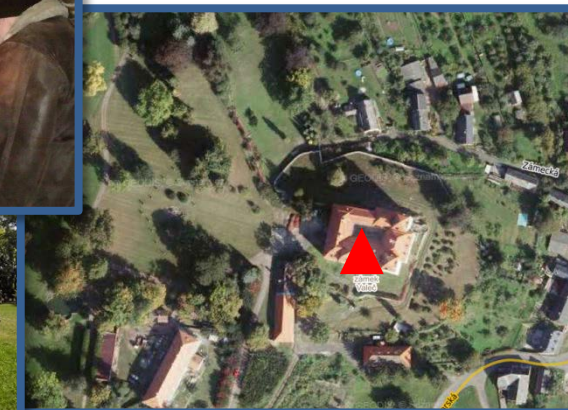

Supplement: Supplementary file 32 [file gi-2017-7-supplement.zip]
