# Supplementary material for: Data quality control and tools in passive seismic experimentsexemplified on Czech broad-band seismic pool MOBNET in theAlpArray collaborative project
Source: Copernicus journal article supplement (doi:10.5194/gi-2017-7), 2017-05-15

# AAE10 Čeminy

## INSTALLATION

Start : 4.7.2014  
Stop : 12.9.2015  
Lat : 49.7998  
Lon : 13.2509  
Alt : 353 m

## EQUIPMENT

Sensor : STS 2 120 s  
Depth : 0 m  
Recorder : Gaia 3  
Power : electricity grid  
Data : miniSeed, 6 GB

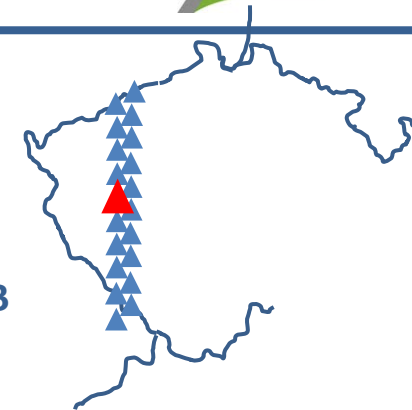

The station is located on the ground floor of an unused room of the Čeminy chateau. Seismometer is built on a concrete floor. The GPS antenna is brought out of the front door, length - 15 m, direction - SW, the view is free.

Geomorf. Division: Plazy Uplands.  
Subsoil: floodplain sediment.

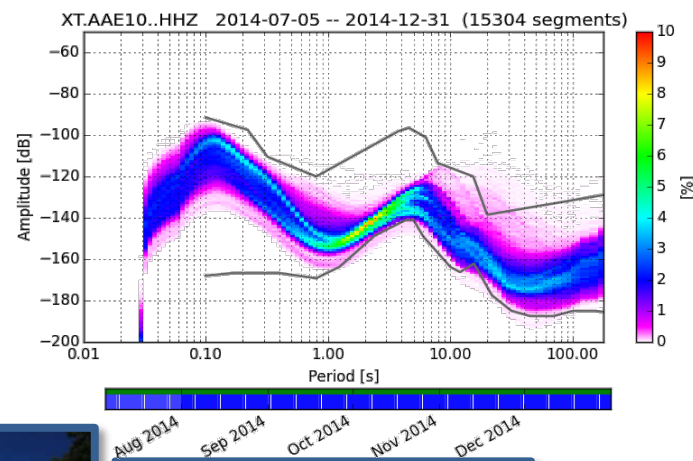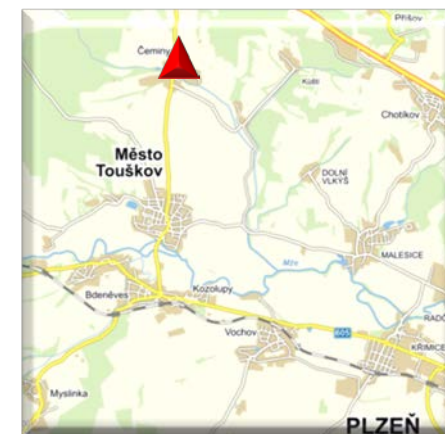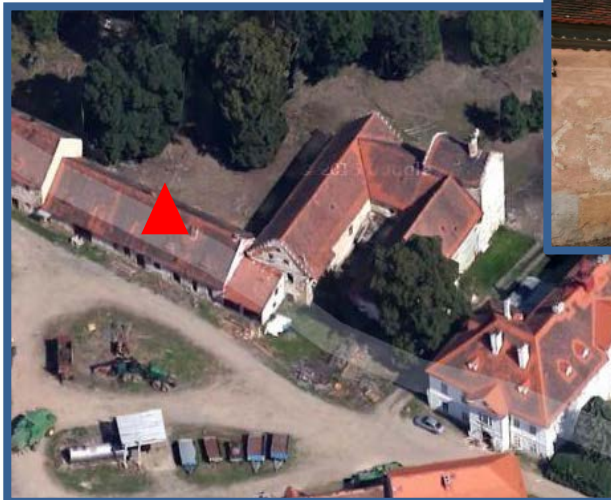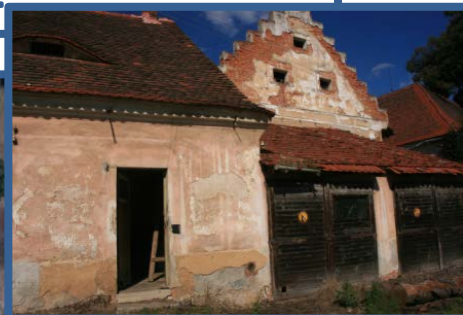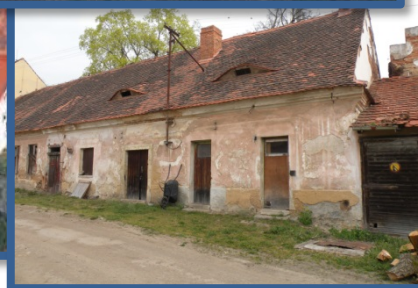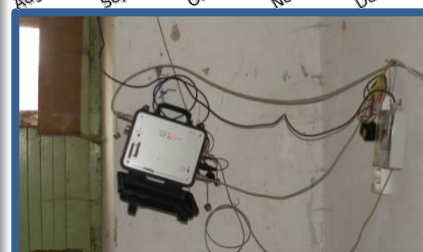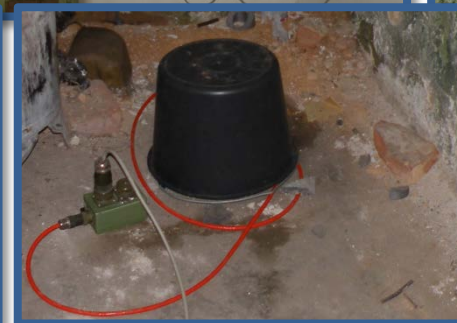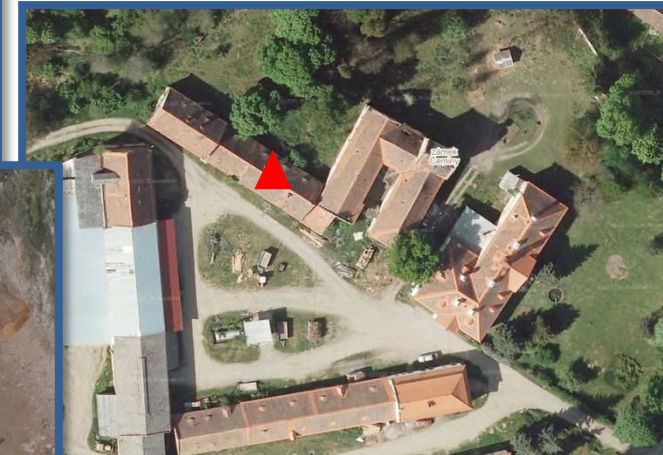

Supplement: Supplementary file 33 [file gi-2017-7-supplement.zip]
