# Supplementary material for: Data quality control and tools in passive seismic experimentsexemplified on Czech broad-band seismic pool MOBNET in theAlpArray collaborative project
Source: Copernicus journal article supplement (doi:10.5194/gi-2017-7), 2017-05-15

# A088A Tovačov

## INSTALLATION

Start : 24.9.2015  
Lat : 49.4302  
Lon : 17.2911  
Alt : 211 m

## EQUIPMENT

Sensor : STS 2 120 s  
Depth : 0 m  
Recorder : Gaia 1  
Power : electricity grid

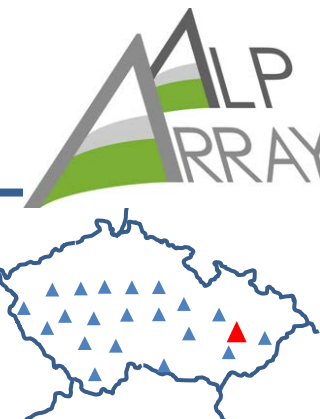

The station is located in an unused room on the ground floor in chateau Tovačov. Seismometer is situated on the concrete floor.

The GPS antenna is brought out through the window, length - 5 m, direction SW, unlimited view.

Geomorphology: Horní Morava Valley.  
Subsoil: loess.

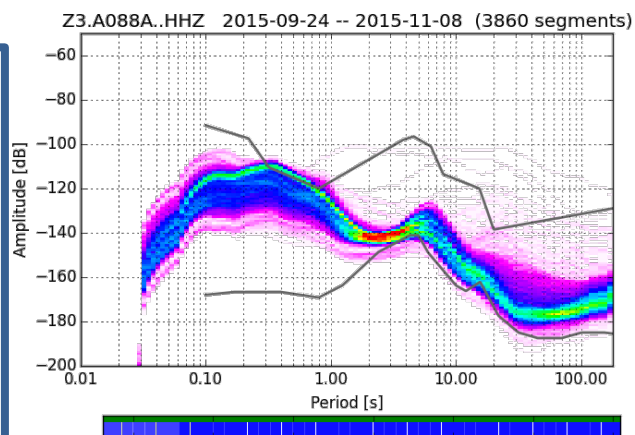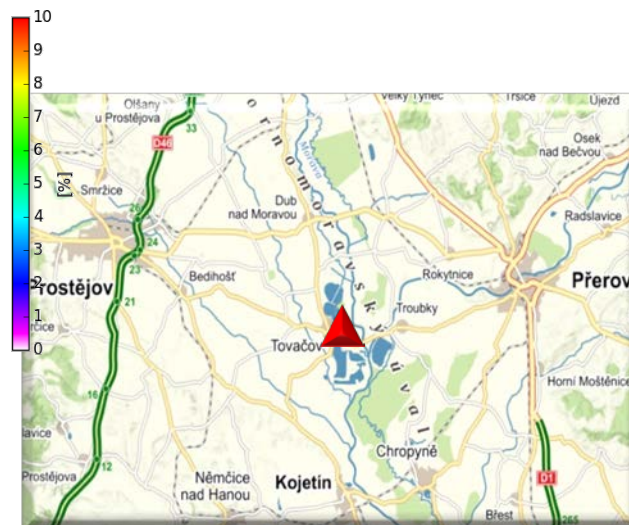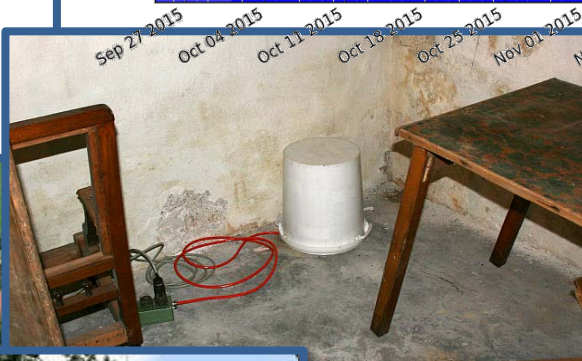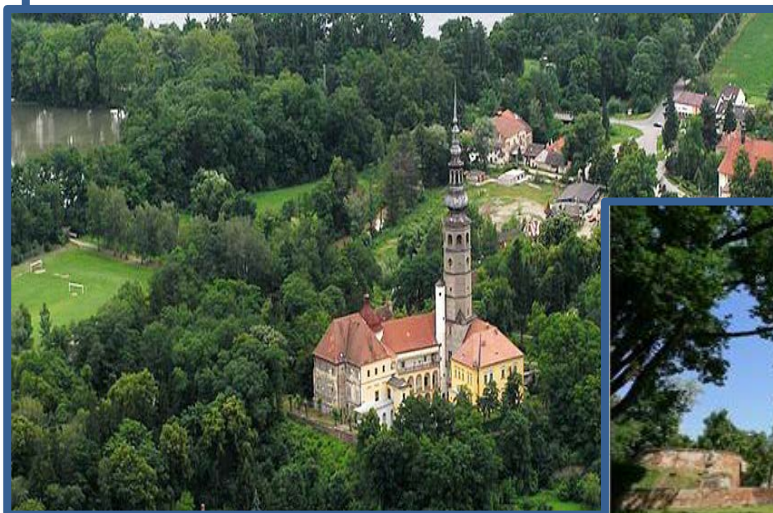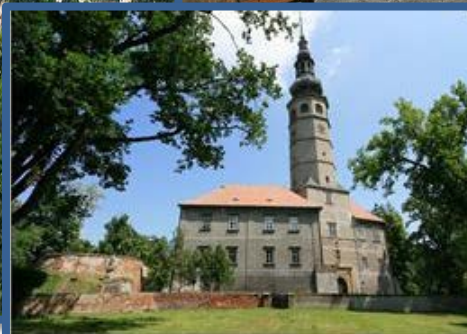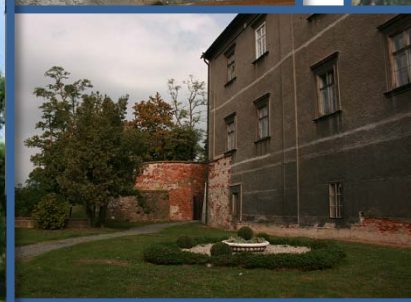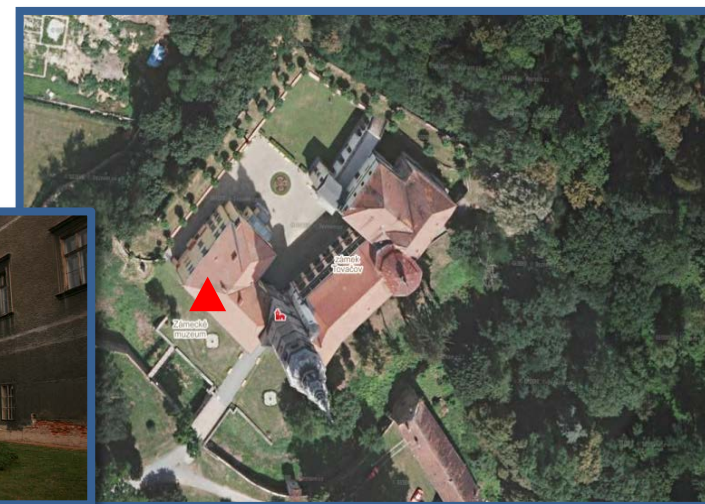

Supplement: Supplementary file 34 [file gi-2017-7-supplement.zip]
