# Supplementary material for: Data quality control and tools in passive seismic experimentsexemplified on Czech broad-band seismic pool MOBNET in theAlpArray collaborative project
Source: Copernicus journal article supplement (doi:10.5194/gi-2017-7), 2017-05-15

**A078A**

**Klet'**

The station is located on the premises of the observatory on Mount Klet'. Seismometer is built in a plastic box on a concrete background at the ground level. The GPS antenna is glued onto the underside of the plastic cover, length - 5 m, a circular open view. Geomorphology: Blansko Forest. Subsoil: granulit (granulite).

## INSTALLATION

Start : 20.10.2015

Lat : 48.8640

Lon : 14.2845

Alt : 1060 m

## EQUIPMENT

Sensor : CMG-3ESP 30 s

Depth : 0 m

Recorder : Gaia 1

Power : solar panel,  
aku 100 Ah

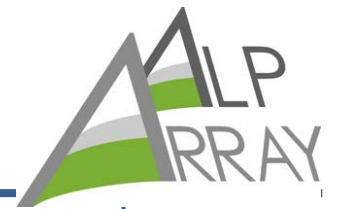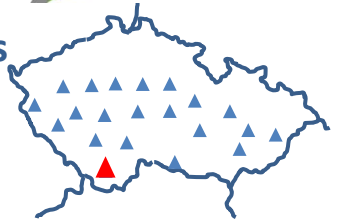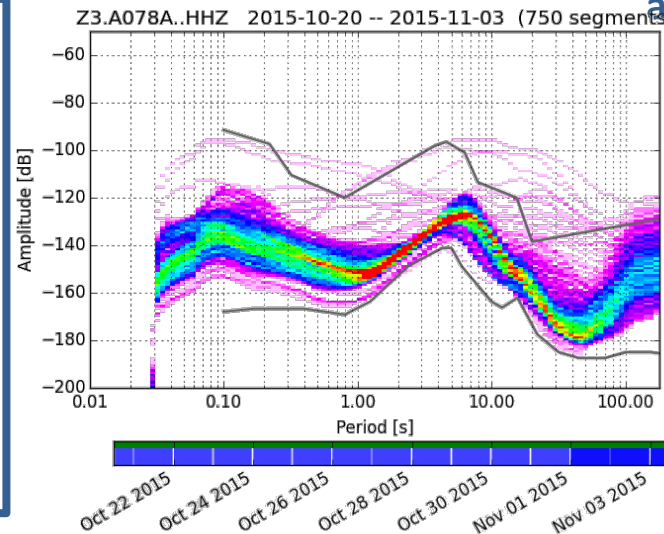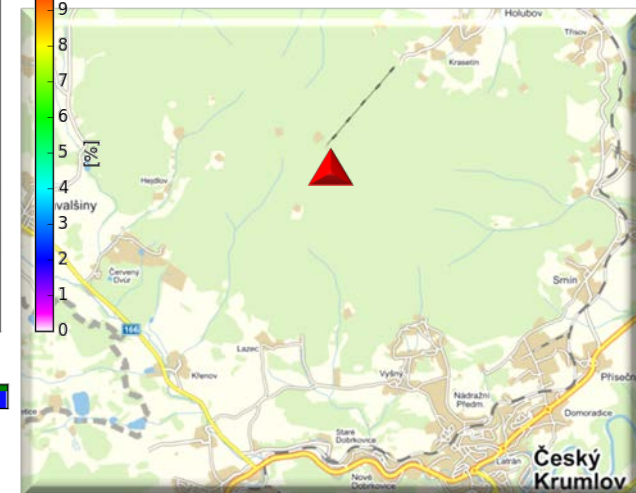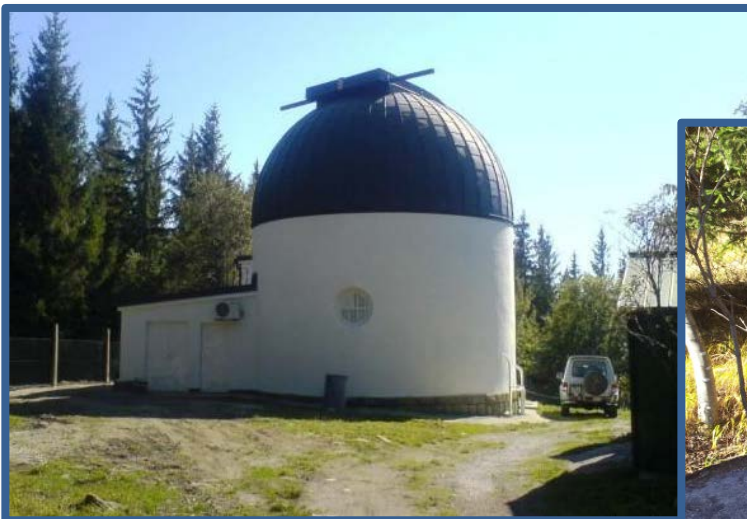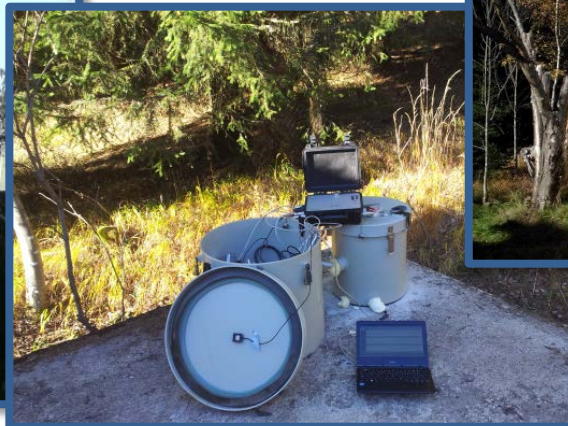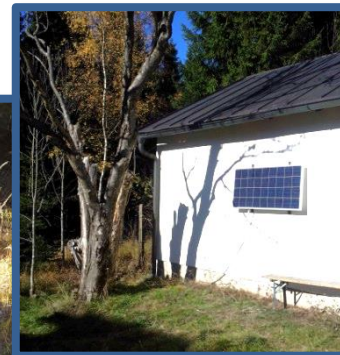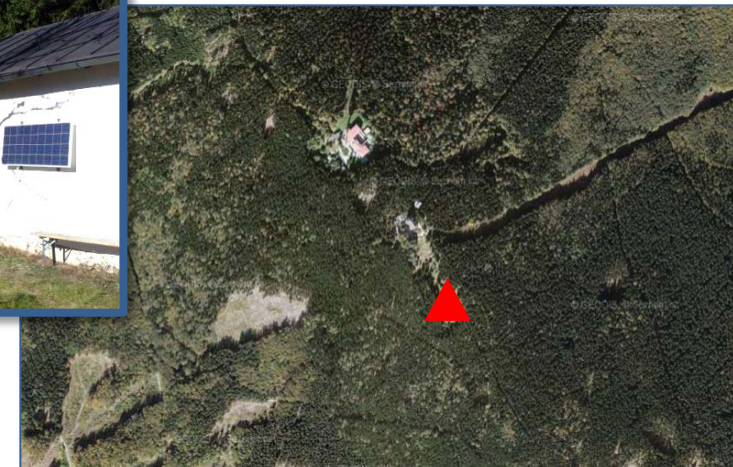

Supplement: Supplementary file 36 [file gi-2017-7-supplement.zip]
