# Supplementary material for: Data quality control and tools in passive seismic experimentsexemplified on Czech broad-band seismic pool MOBNET in theAlpArray collaborative project
Source: Copernicus journal article supplement (doi:10.5194/gi-2017-7), 2017-05-15

# A090A Maruška

## INSTALLATION

Start : 24.9.2015  
Lat : 49.3655  
Lon : 17.8278  
Alt : 659 m

## EQUIPMENT

Sensor : CMG3ESPC 30s  
Depth : 0.5 m  
Recorder : Gaia 1  
Power : electricity grid

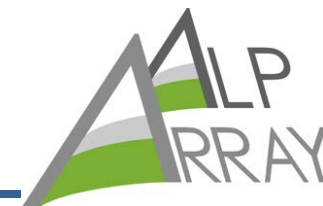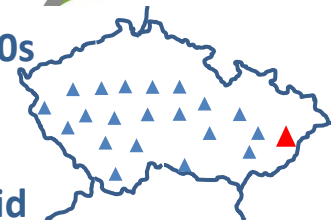

The station is built in the complex of the meteorological station Maruška.  
Seismometer is placed in a buried plastic shaft with a concrete pillar.  
GPS antenna is mounted on the inside of the lid, length - 5 m, omnidirectional unlimited view.  
Geomorphology: Hostýn-Vsetín Highlands.  
Subsoil: sandstone, claystone.

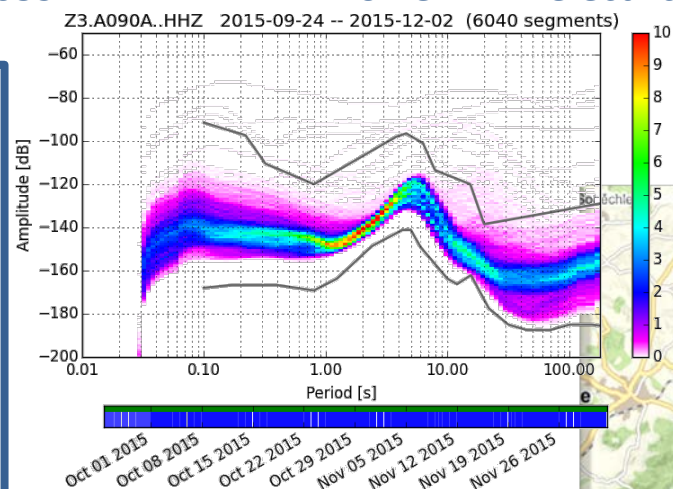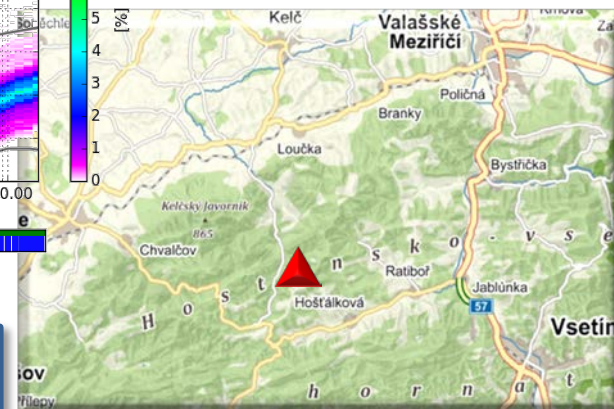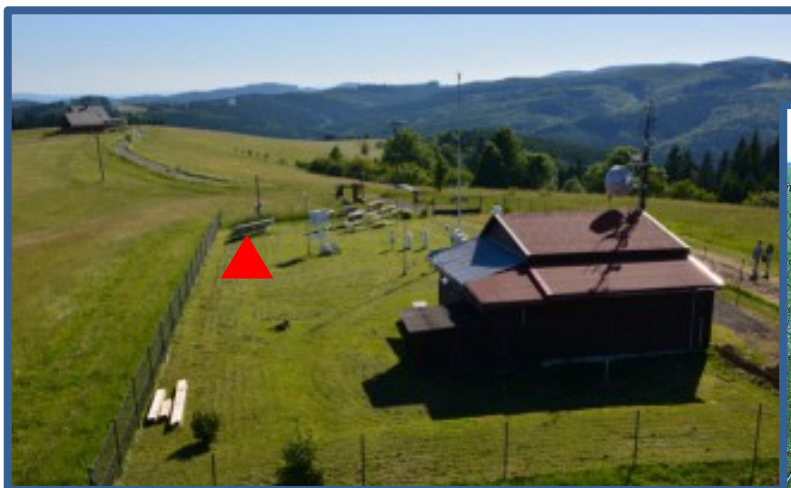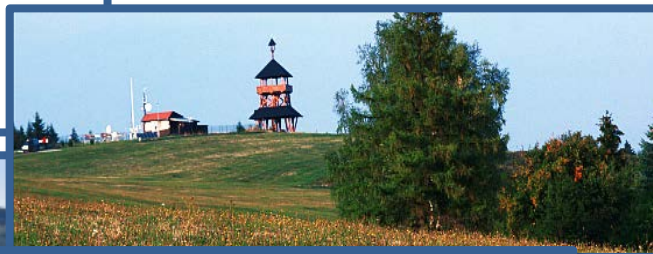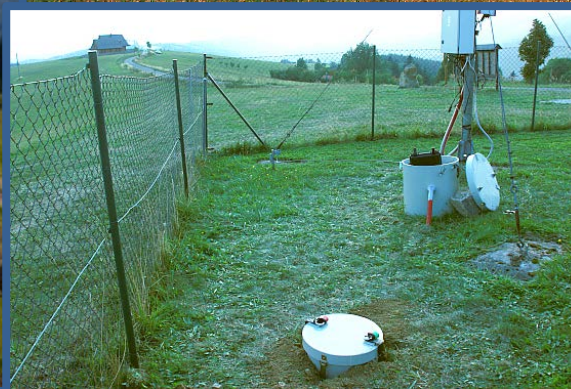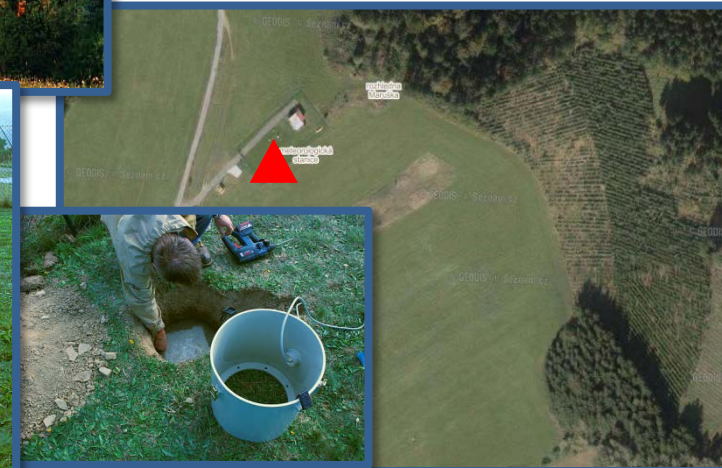

Supplement: Supplementary file 37 [file gi-2017-7-supplement.zip]
