# Supplementary material for: Data quality control and tools in passive seismic experimentsexemplified on Czech broad-band seismic pool MOBNET in theAlpArray collaborative project
Source: Copernicus journal article supplement (doi:10.5194/gi-2017-7), 2017-05-15

# AAE07 Ostrovec

## INSTALLATION

Start : 1.7.2014  
Stop : 3.9. 2015  
Lat : 50.0733  
Lon : 13.4220  
Alt : 460 m

## EQUIPMENT

Sensor : STS 2 120 s  
Depth : 0 m  
Recorder : Gaia 1  
Power : electricity grid  
Data : miniSeed, 6 GB

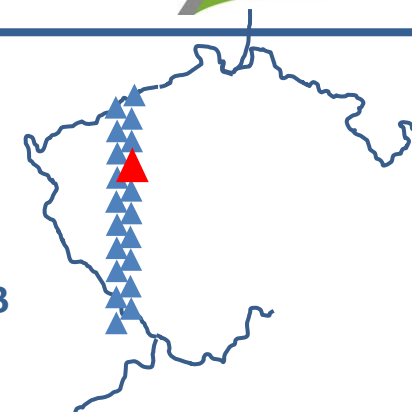

The station is located on the ground floor of the stairs leading to the choir in the church St. John the Baptist in Ostrovec. The church is unused.

Seismometer is built on the stone floor. The GPS antenna is brought out through the window, lenght - 5 m long, direction - SW, the view is free.

Geomorphology: Rakovník Upland.  
Subsoil: sandstones, conglomerates.

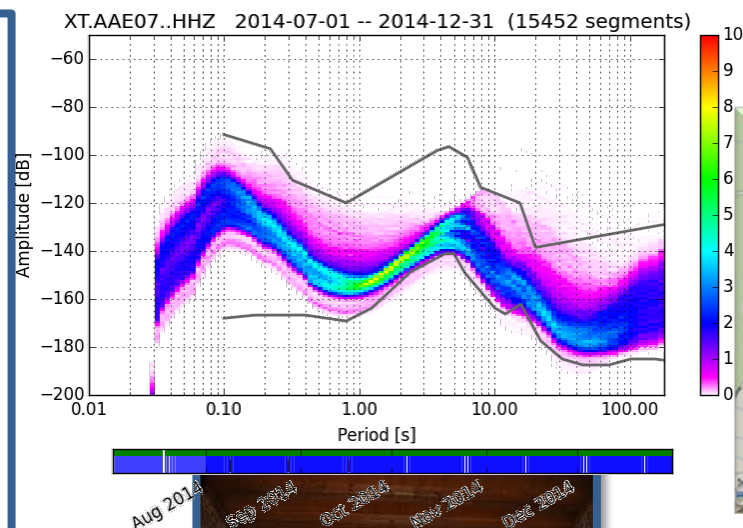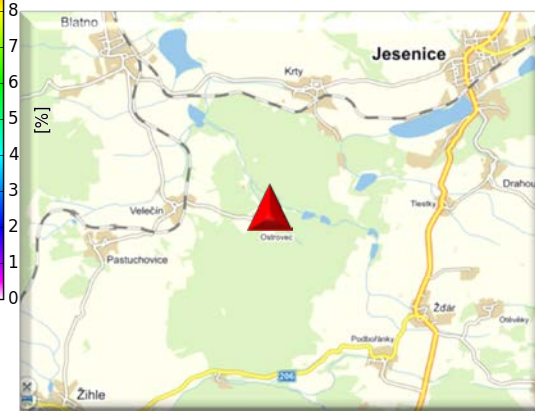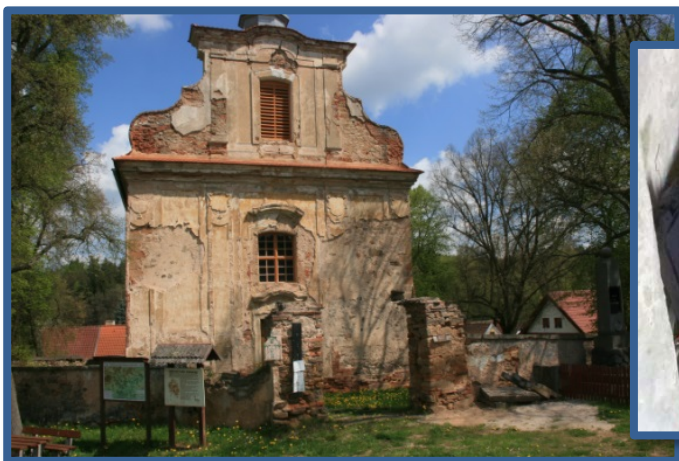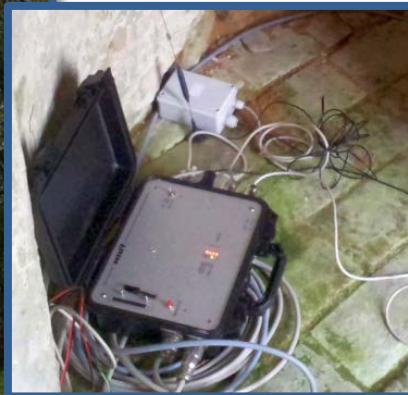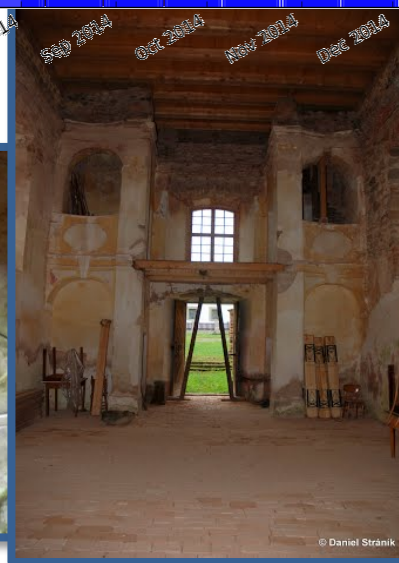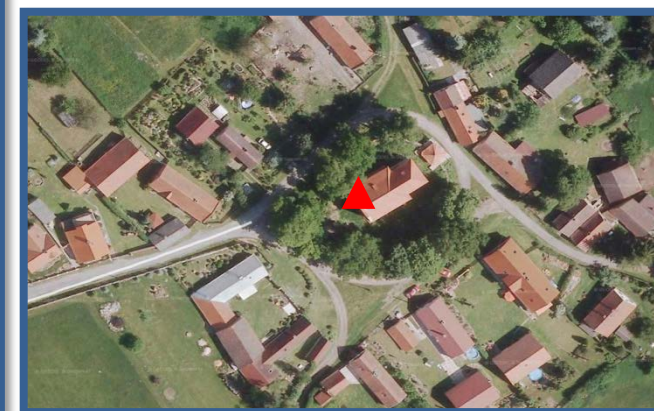

Supplement: Supplementary file 38 [file gi-2017-7-supplement.zip]
